# Supplementary material for: Genome-wide association study and population structure analysis of seed-bound amino acids and total protein in watermelon
Source: PubMed Central journal article supplement (PMC8533027; doi:10.7717/peerj.12343), 2021-10-19
Supplement: peerj-09-12343-s005.pdf [file peerj-09-12343-s005.pdf]

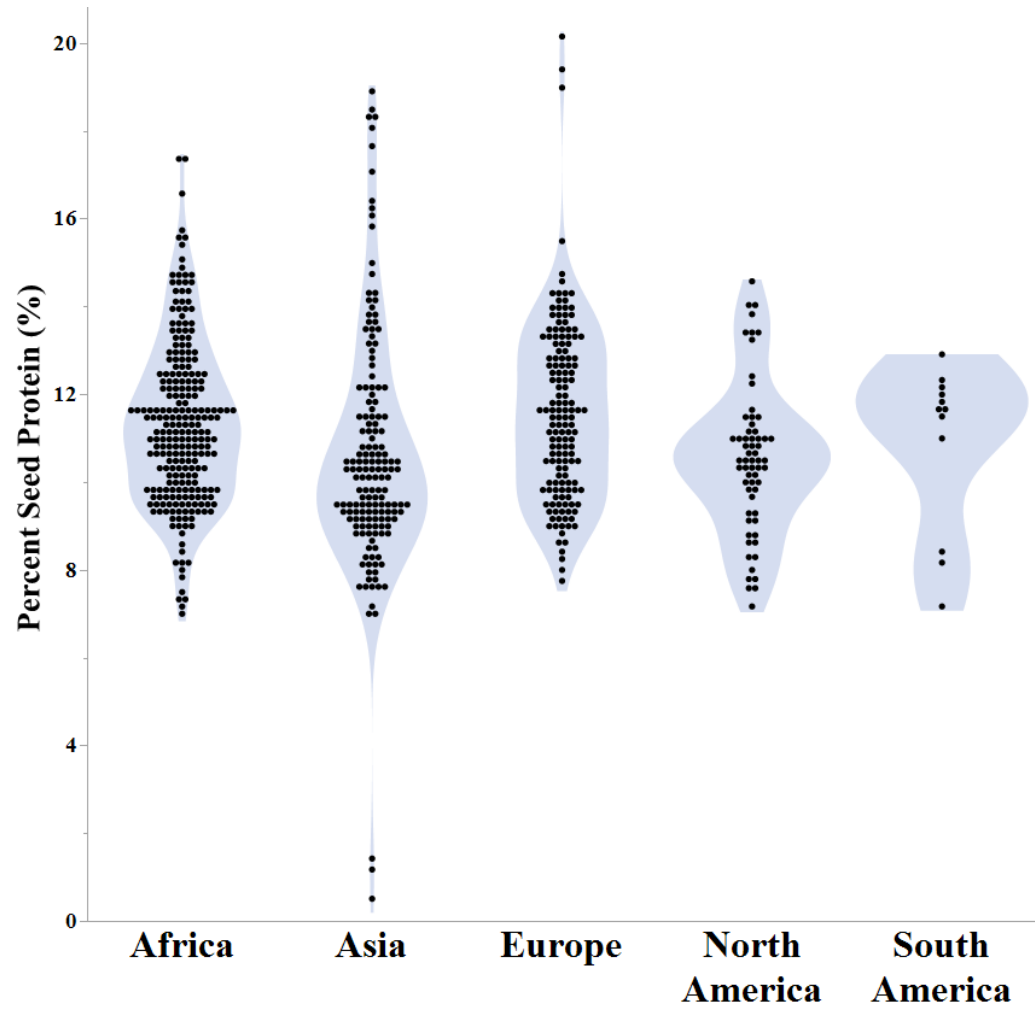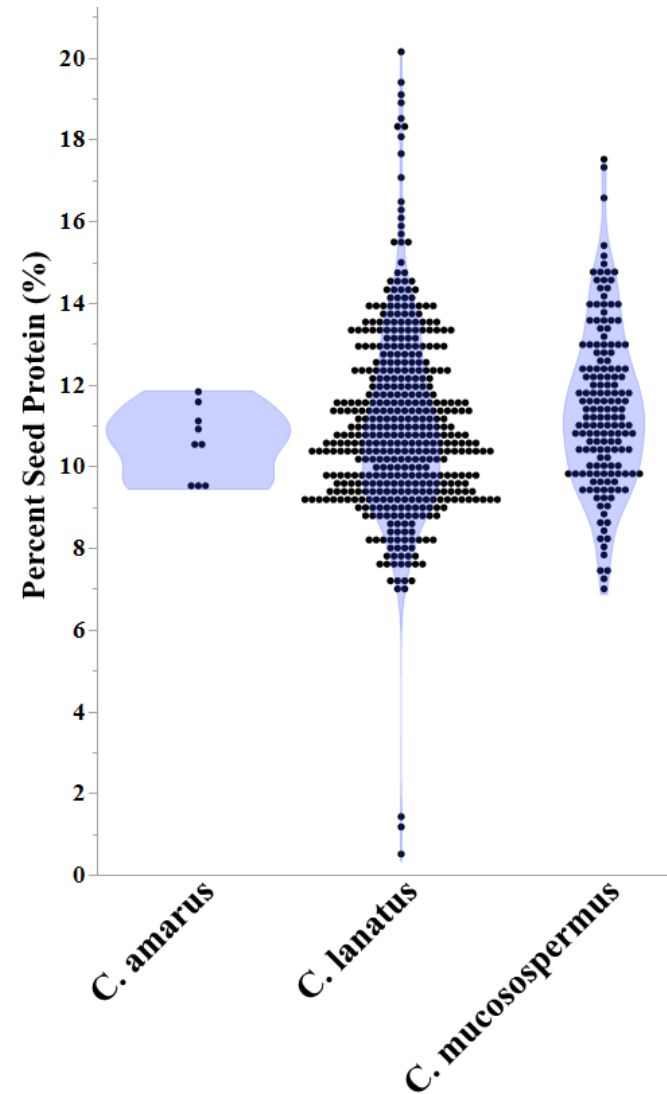

Supplemental Figure S5. Contour graphs showing geographic variation in protein content across continents (A) and species (B) in watermelon accessions.
