# Supplementary material for: Genome-wide association study and population structure analysis of seed-bound amino acids and total protein in watermelon
Source: PubMed Central journal article supplement (PMC8533027; doi:10.7717/peerj.12343), 2021-10-19
Supplement: peerj-09-12343-s007.pdf [file peerj-09-12343-s007.pdf]

## Histidine

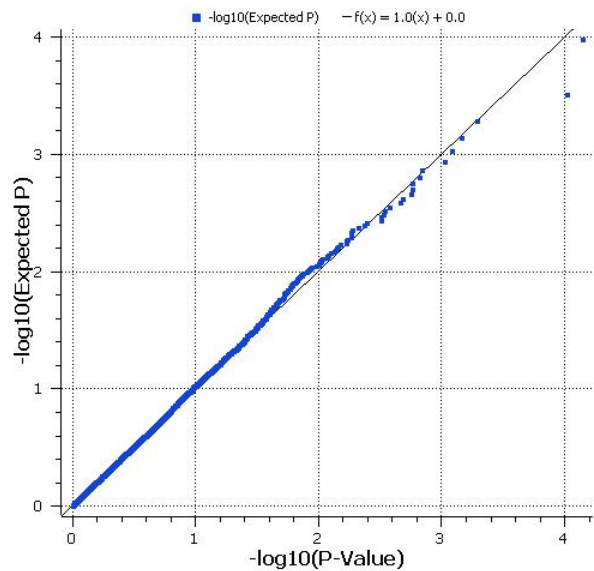

## Arginine

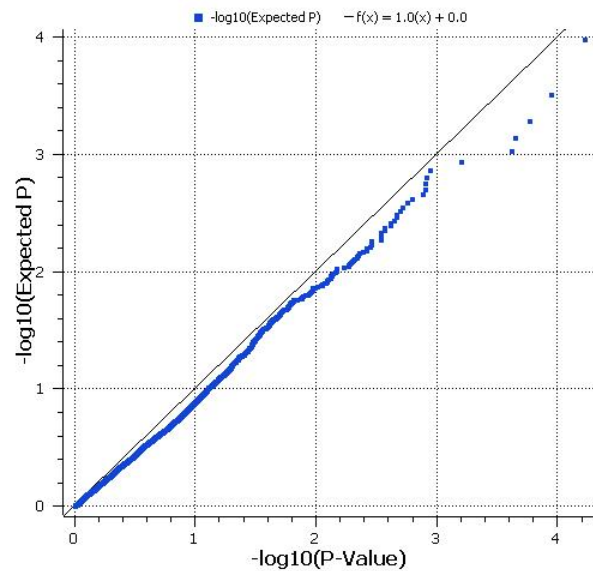

## Asparagine

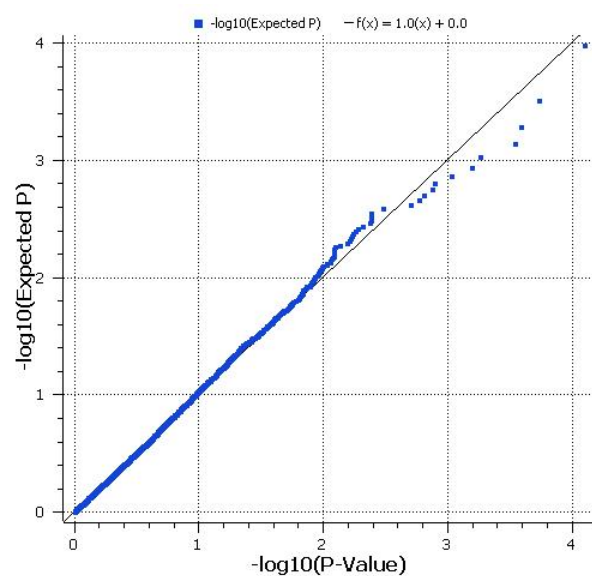

## Glutamine

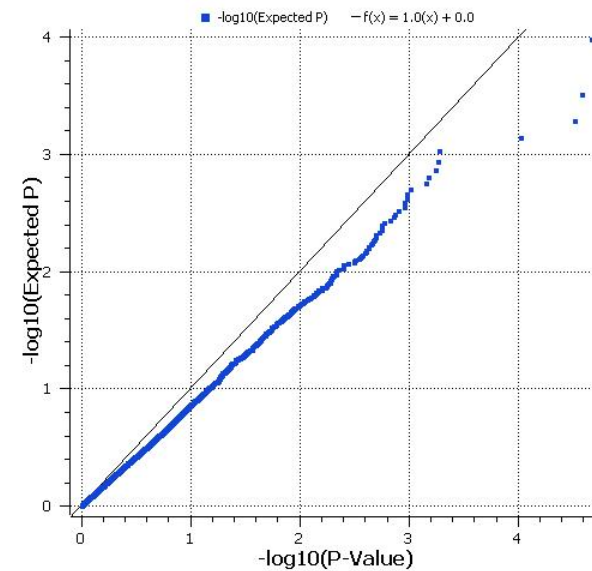

## Serine

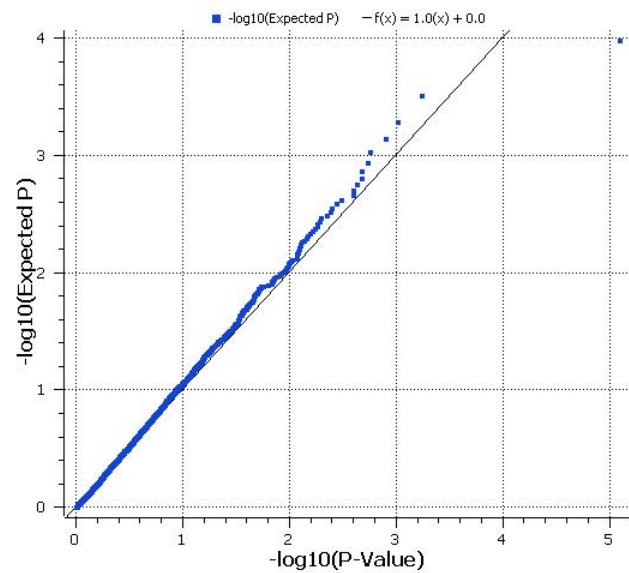

## Glutamic Acid

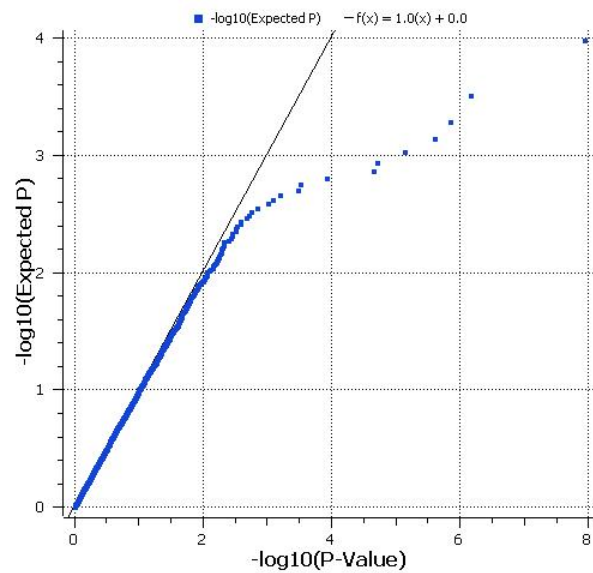

## Aspartic Acid

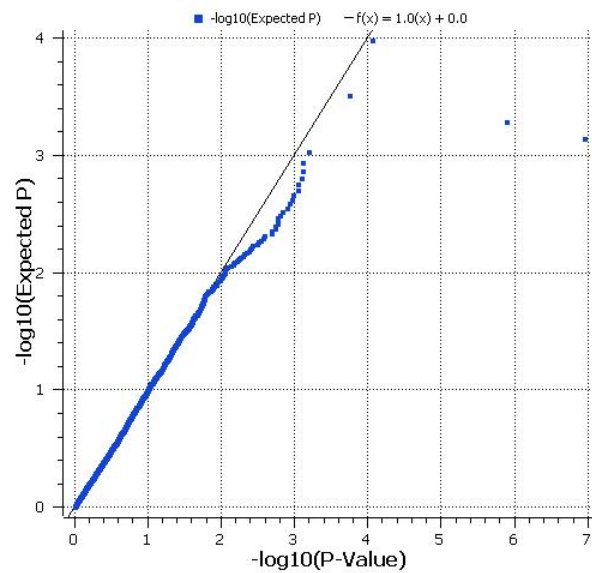

## Citrulline

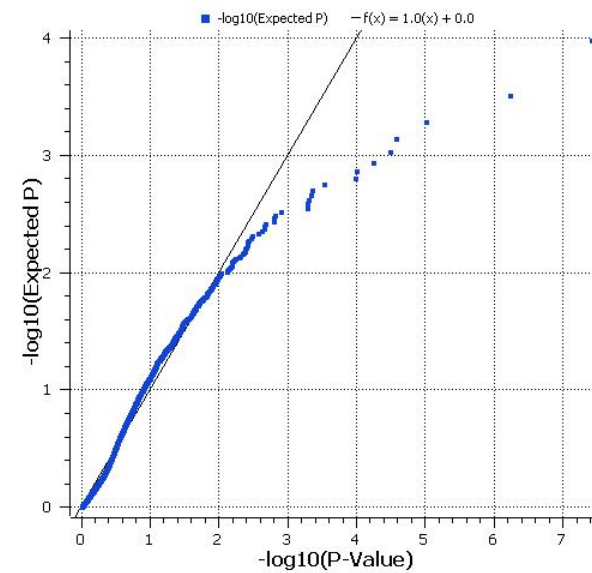

## Threonine

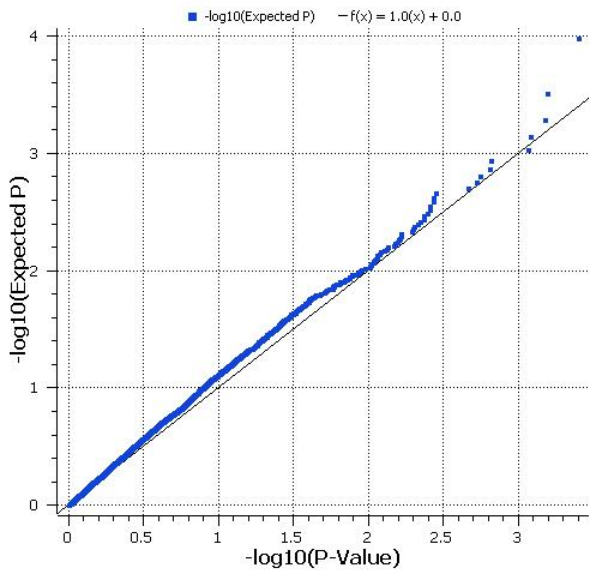

## Glycine

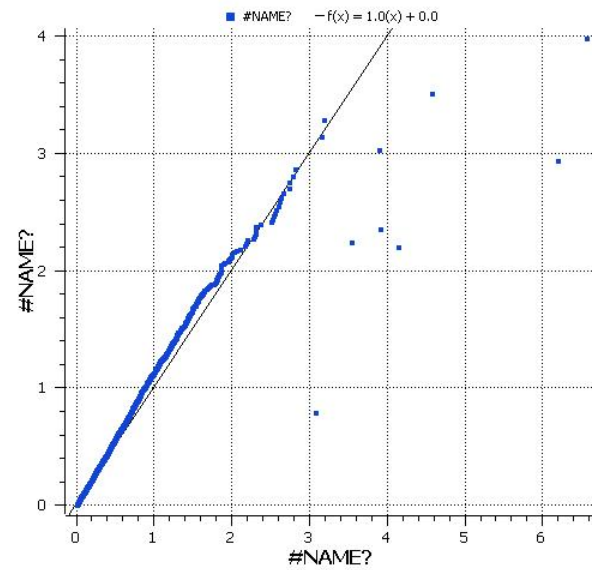

## Alanine

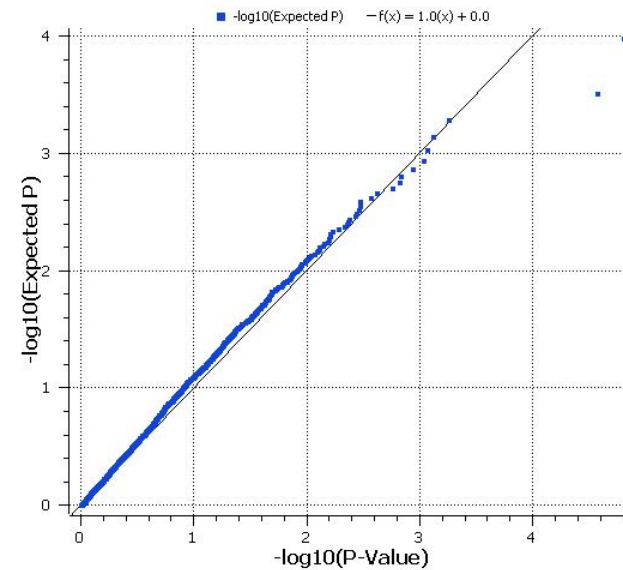

## GABA

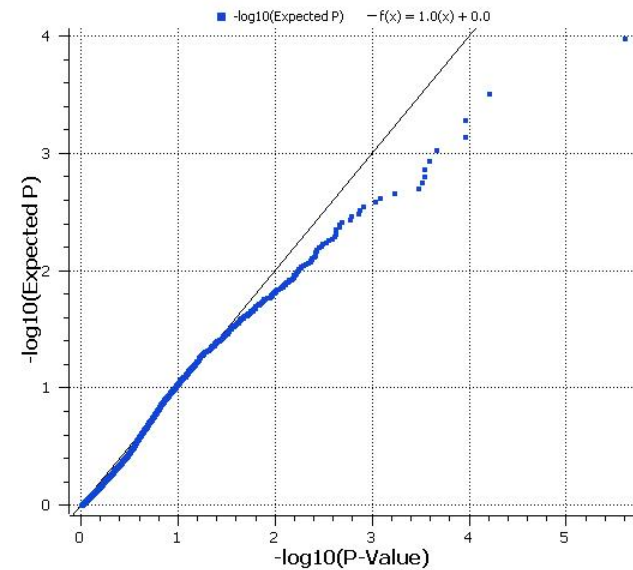

## Proline

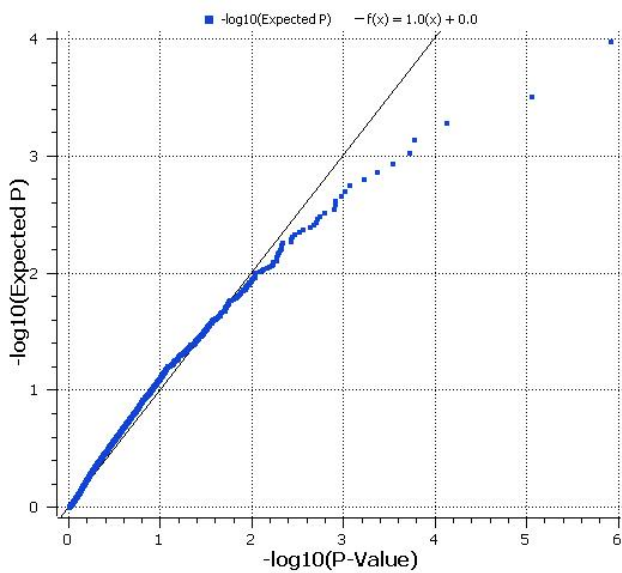

## L-Ornithine

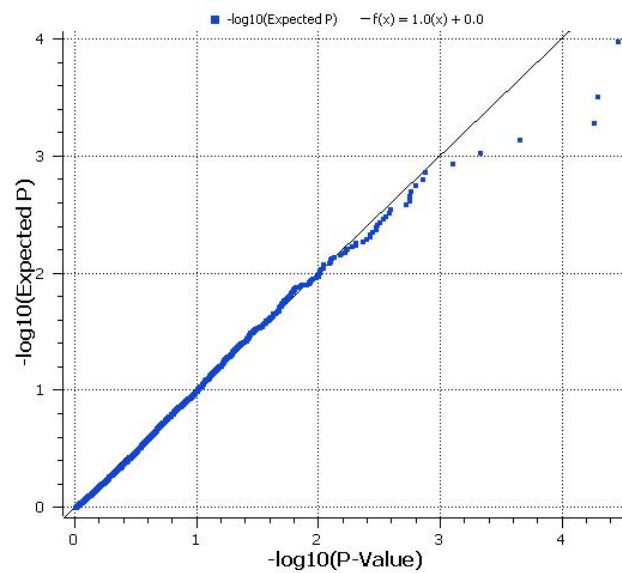

## Cystine

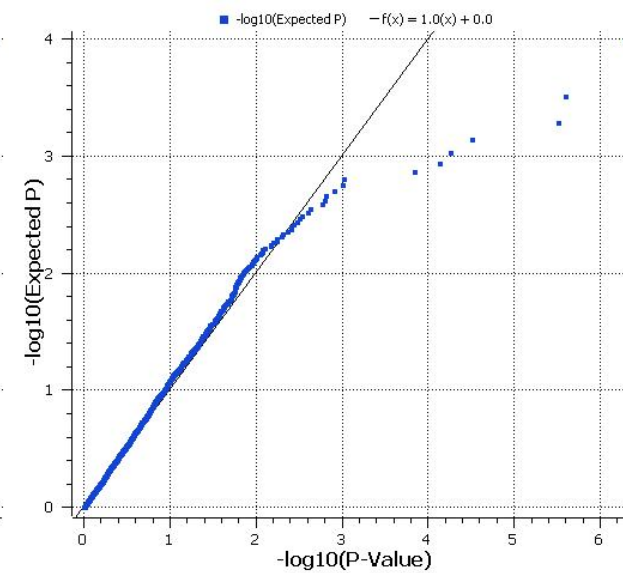

## Lysine

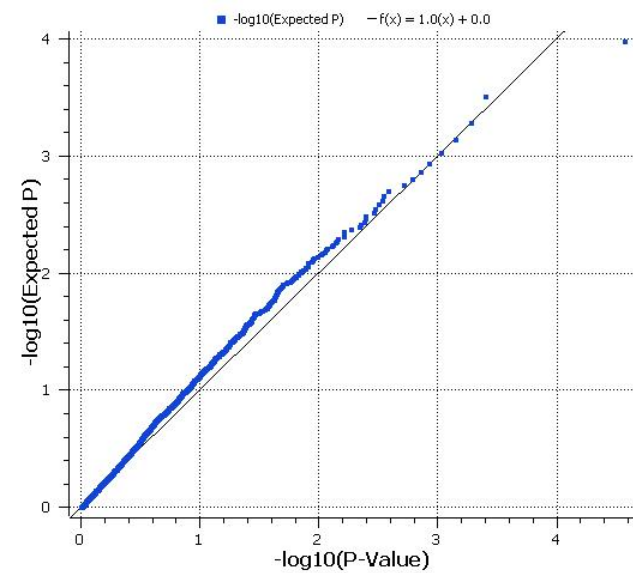

**Tyrosine**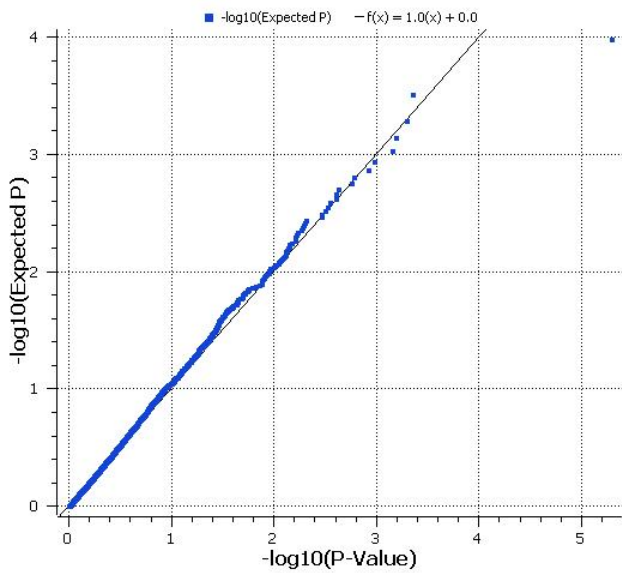**Methionine**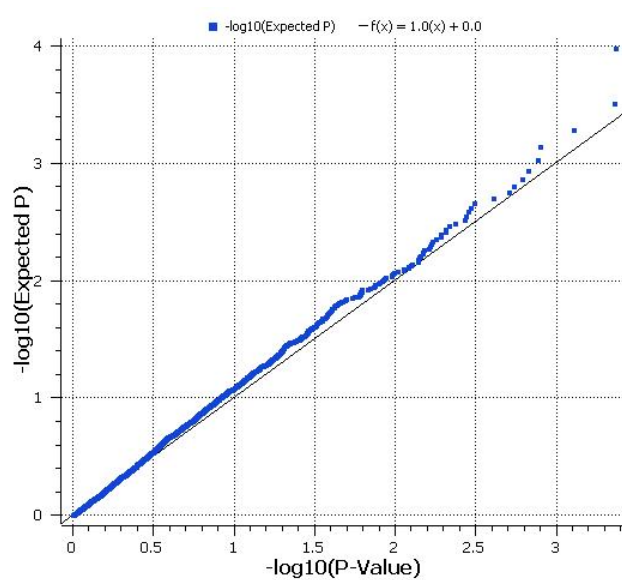**Valine**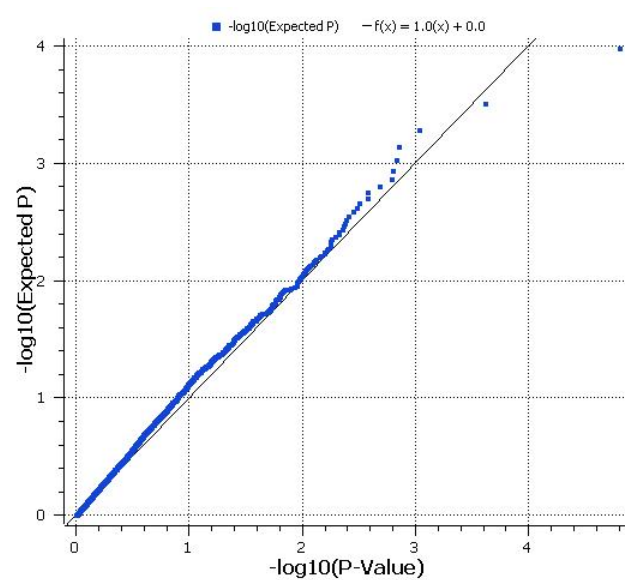**Isoleucine**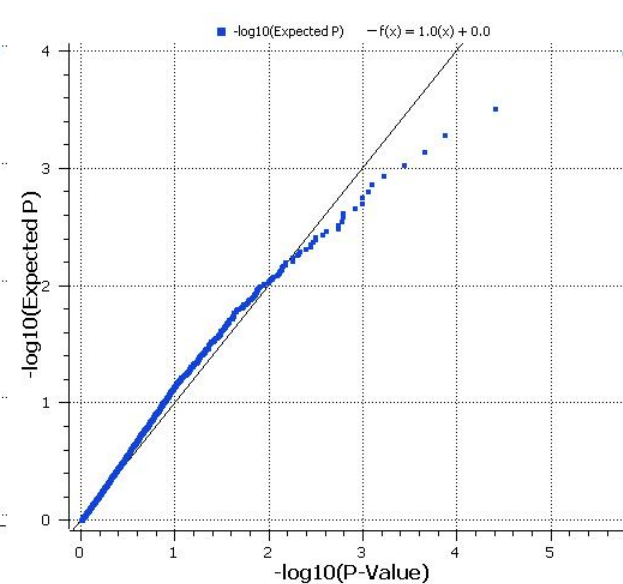**Leucine**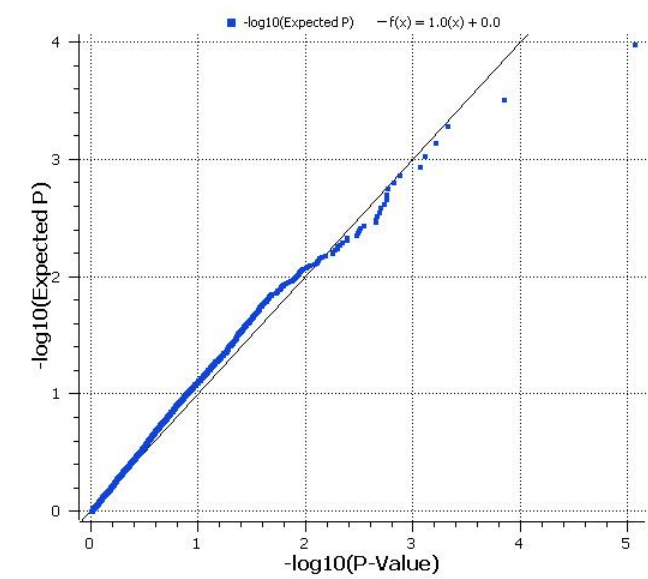**Phenylalanine**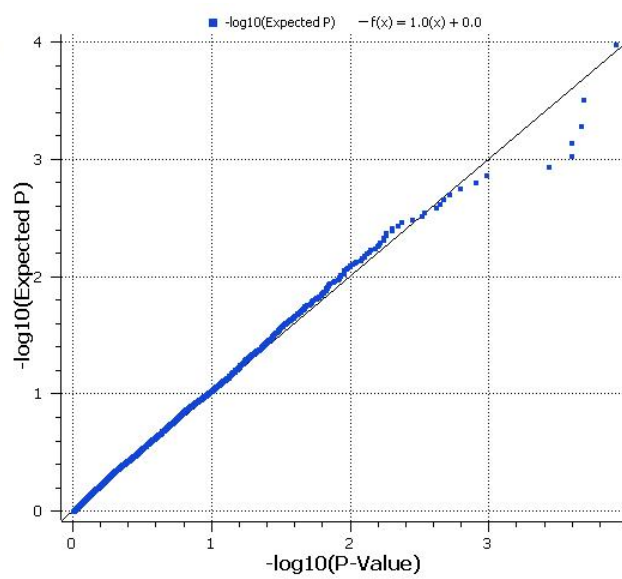**Ethanolamine**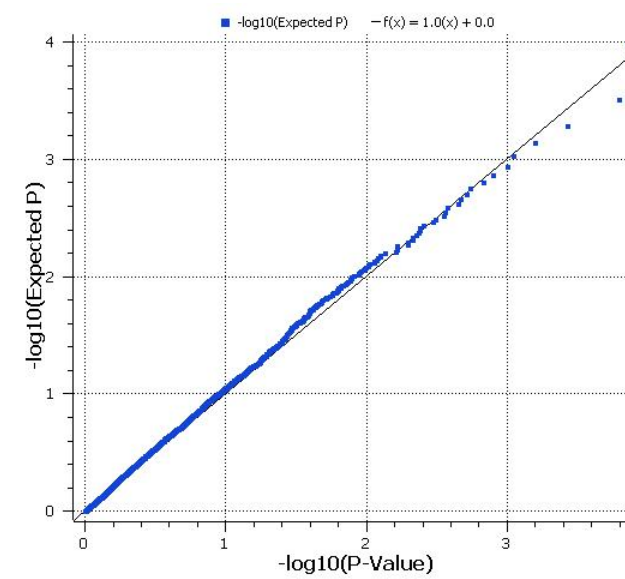**Hydroxylysine**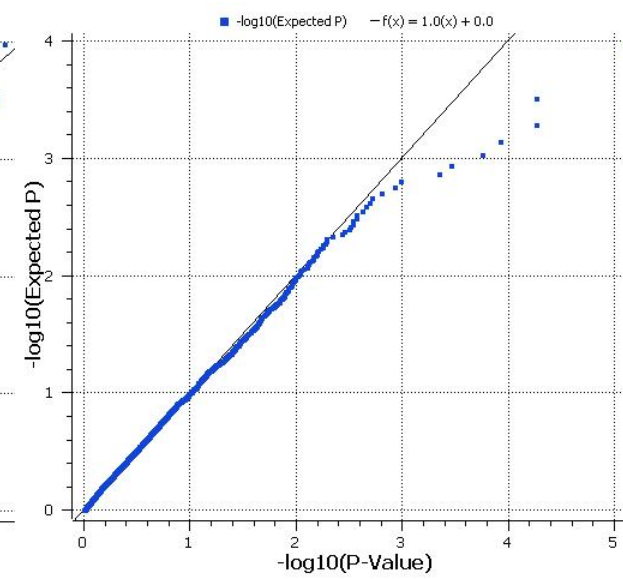

### Alpha Amino adipic Acid

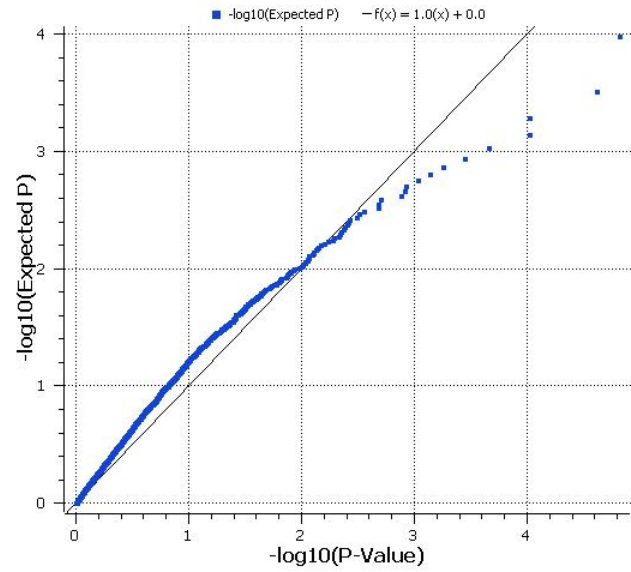

### Kynurenine

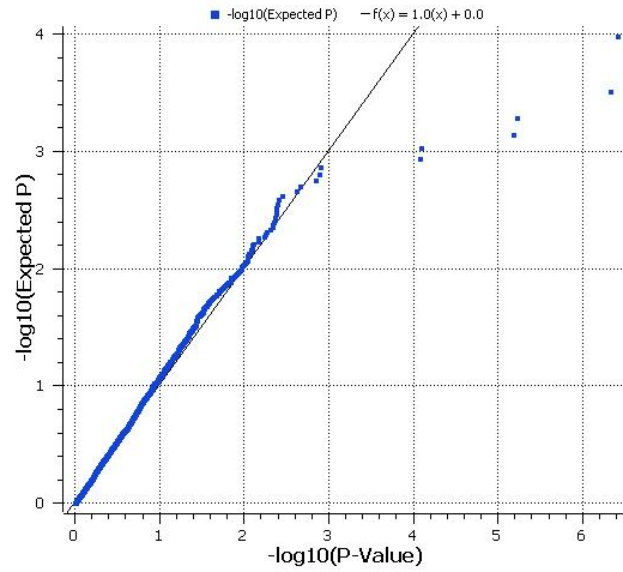

### Tryptophan

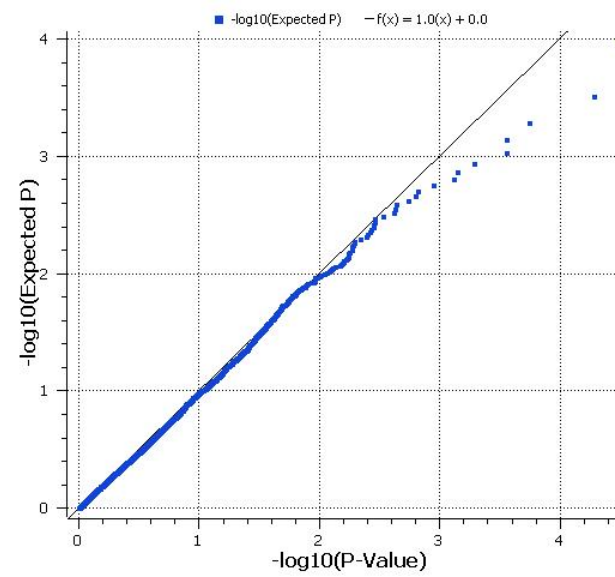

### Argininosuccinic Acid

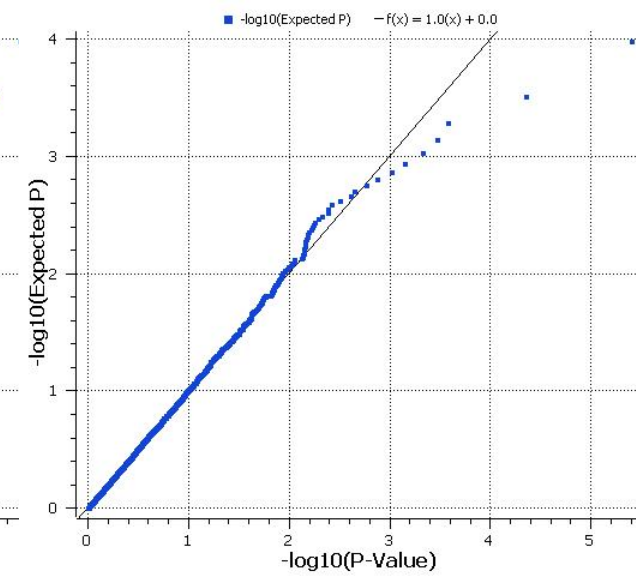

Supplemental Figure S7. Q-Q (quantile-quantile) plots of different amino acids. The plots were drawn for expected vs. observed  $-\log_{10}$  (p-values) for all amino acids.
