# Supplementary material for: Genome-wide association study and population structure analysis of seed-bound amino acids and total protein in watermelon
Source: PubMed Central journal article supplement (PMC8533027; doi:10.7717/peerj.12343), 2021-10-19
Supplement: peerj-09-12343-s008.pdf [file peerj-09-12343-s008.pdf]

## Total Proteins

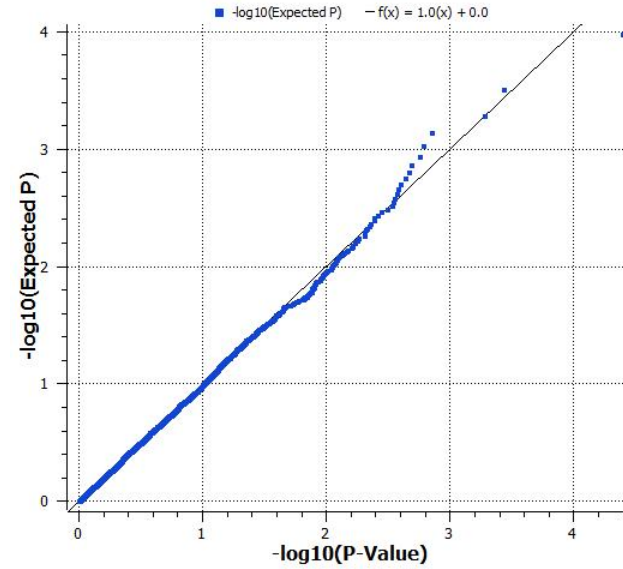

Supplemental Figure S8. Q-Q (quantile-quantile) plots of total proteins. The plots was drawn for expected vs. observed  $-\log_{10}$  (p-values) for total seed proteins.
