# Supplementary material for: Genome-wide association study and population structure analysis of seed-bound amino acids and total protein in watermelon
Source: PubMed Central journal article supplement (PMC8533027; doi:10.7717/peerj.12343), 2021-10-19
Supplement: peerj-09-12343-s009.pdf [file peerj-09-12343-s009.pdf]

### Histidine

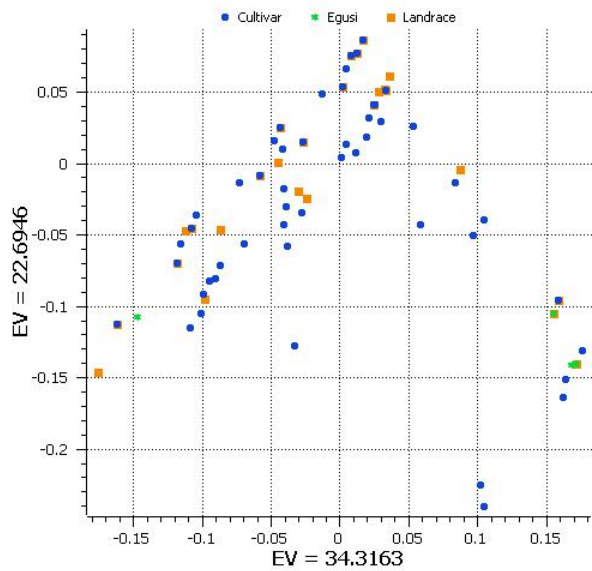

### Arginine

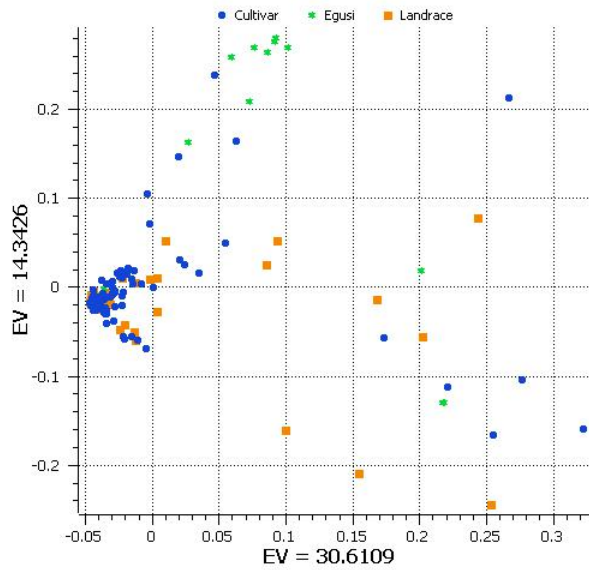

### Asparagine

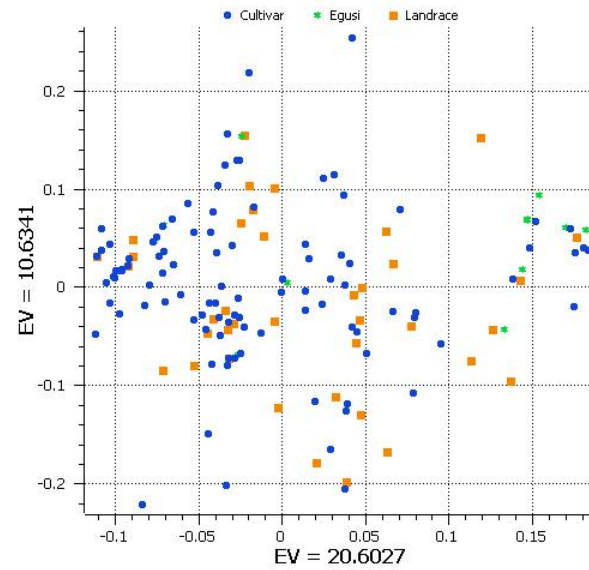

### Glutamine

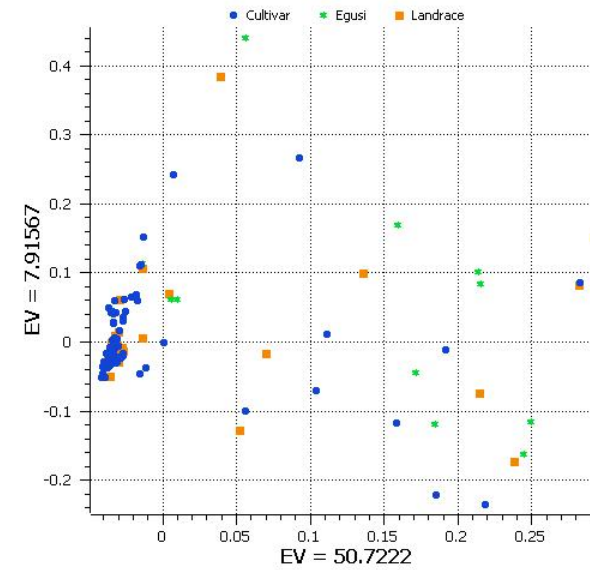

### Serine

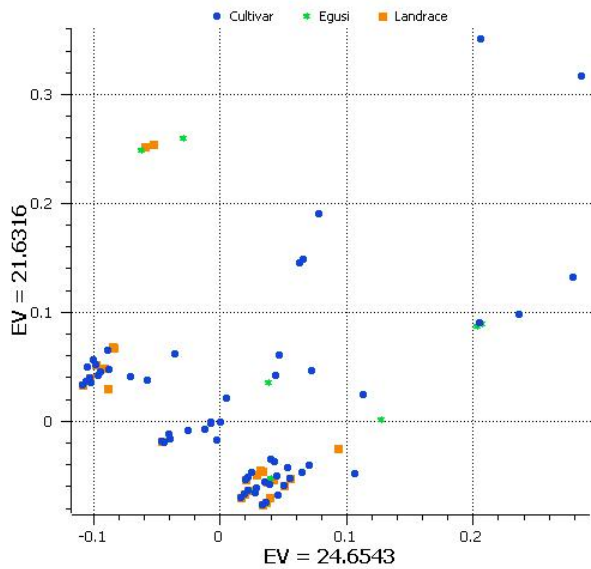

### Glutamic Acid

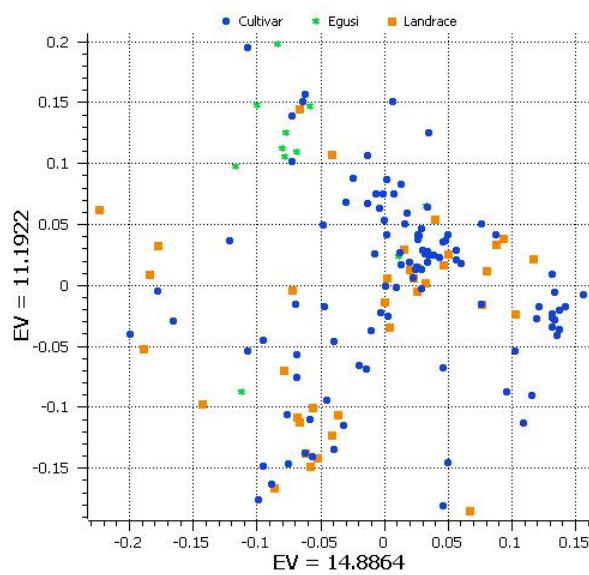

### Aspartic Acid

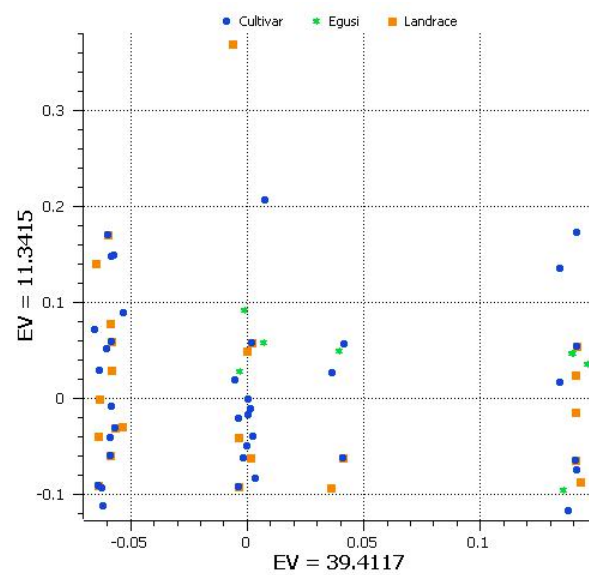

### Citrulline

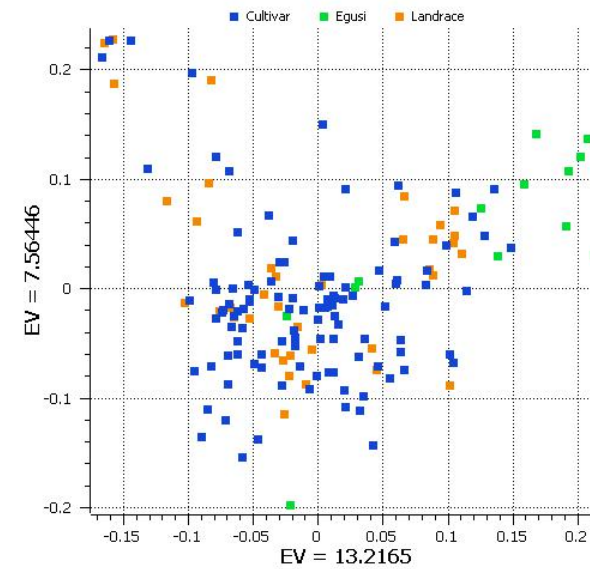

Supplemental Figure S9. Principal component analysis (PCA) for amino acids showing the components of population genetic variation

### Threonine

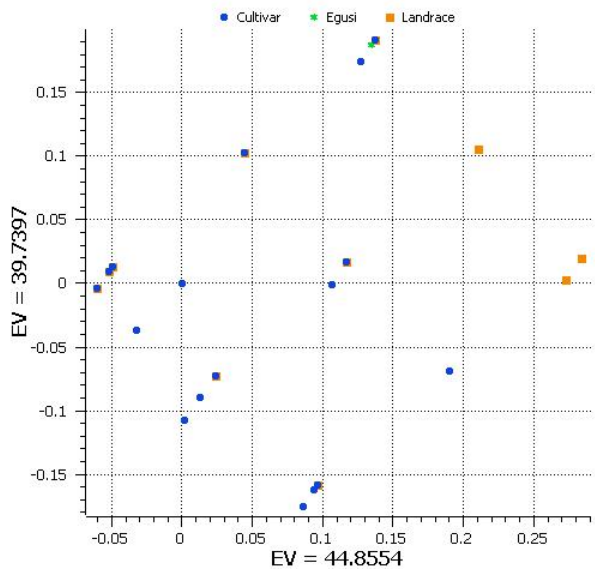

### Glycine

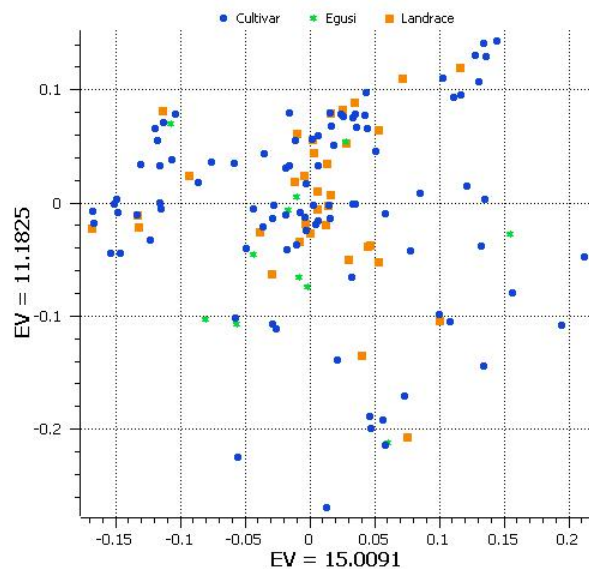

### Alanine

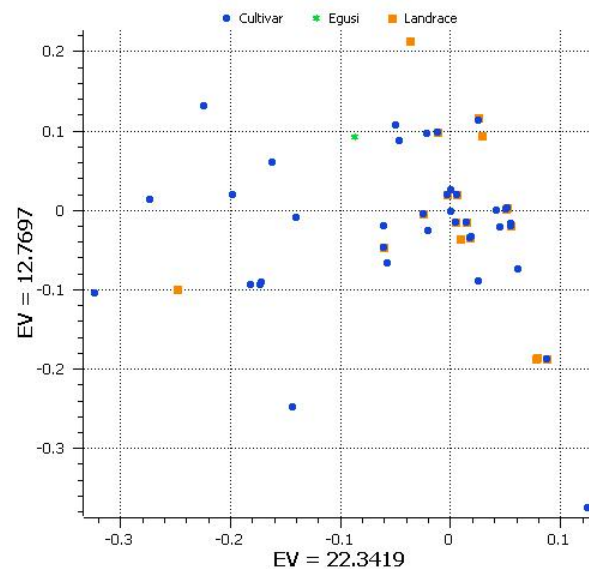

### GABA

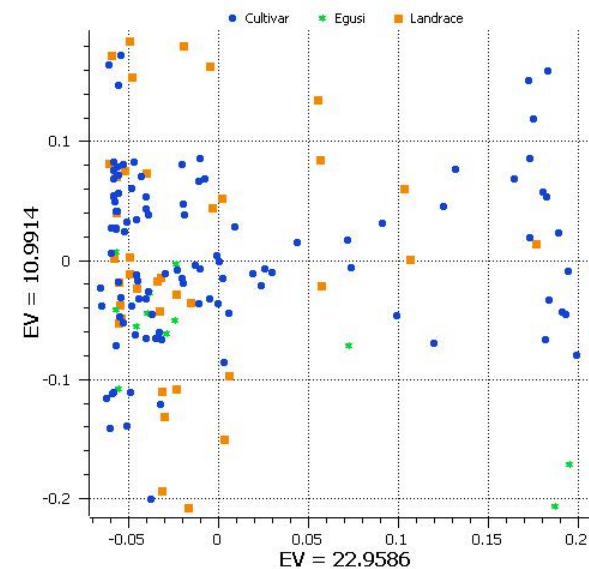

### Proline

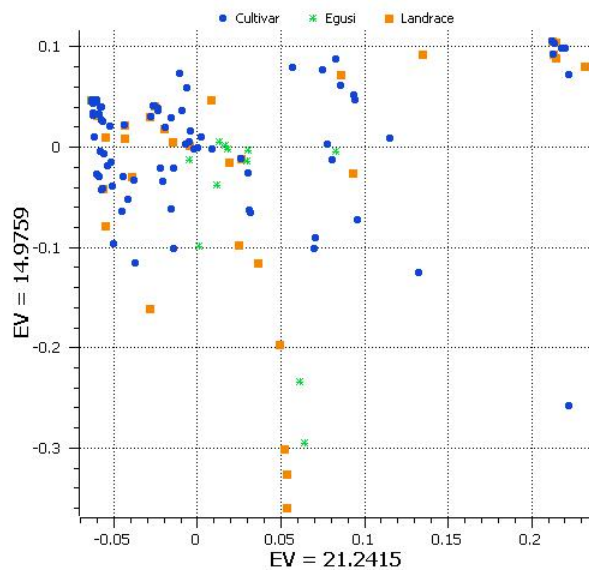

### L-Ornithine

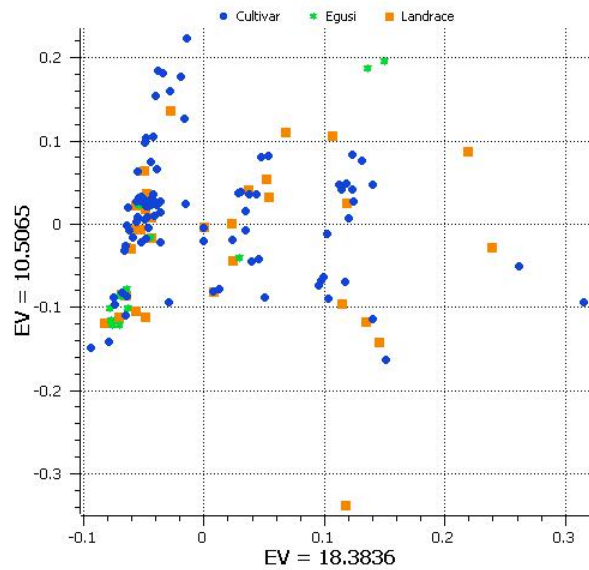

### Cystine

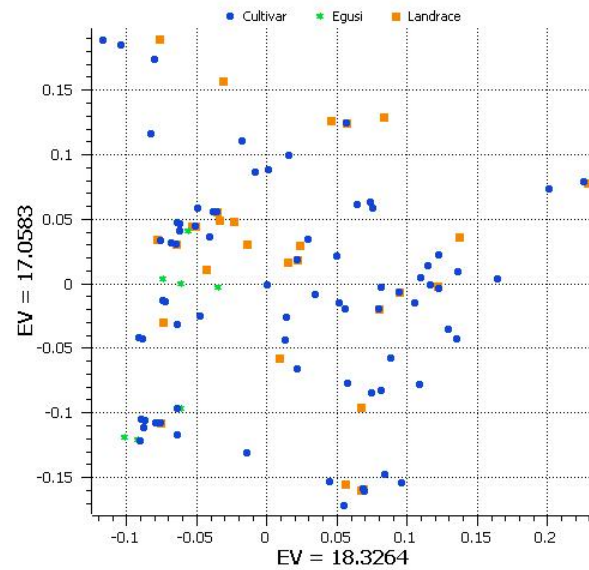

### Lysine

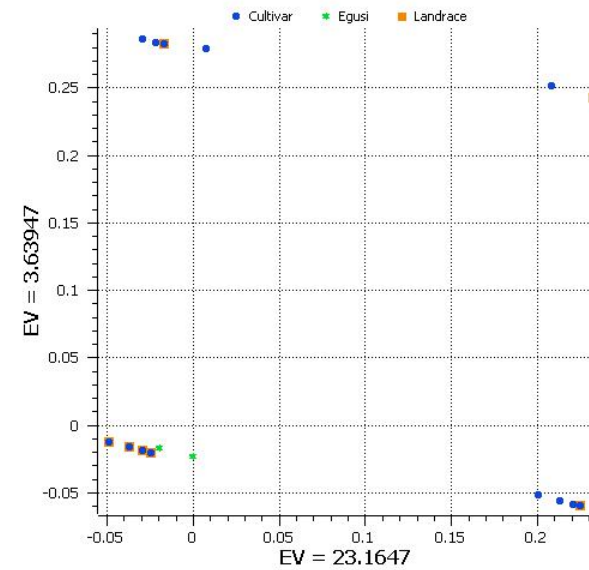

Supplemental Figure S9. Principal component analysis (PCA) for amino acids showing the components of population genetic variation



## Tyrosine

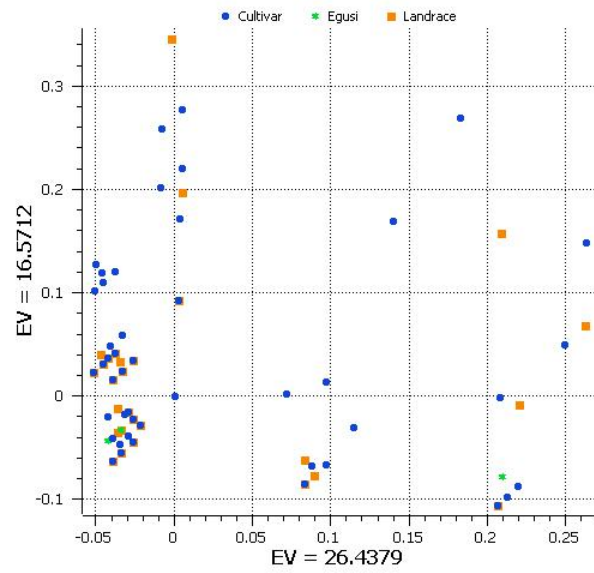

## Methionine

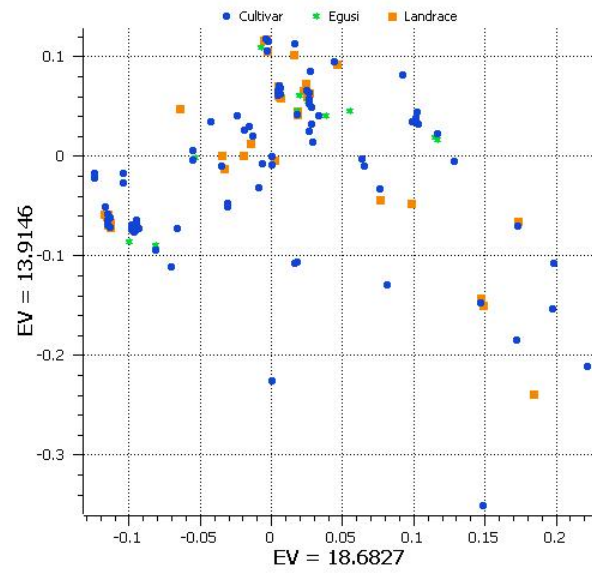

## Valine

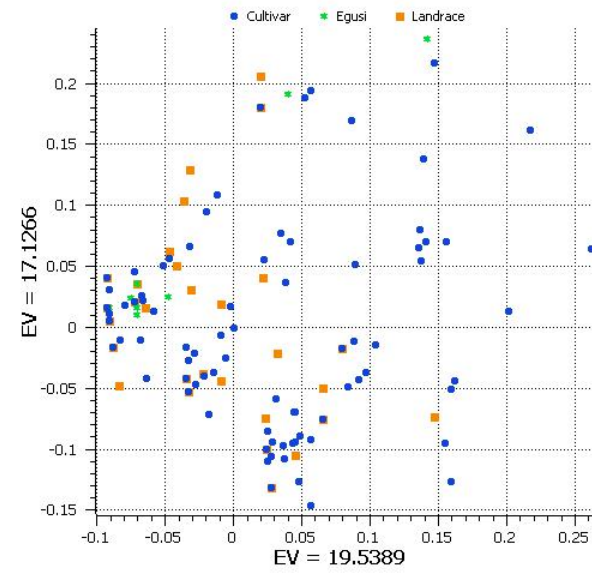

## Isoleucine

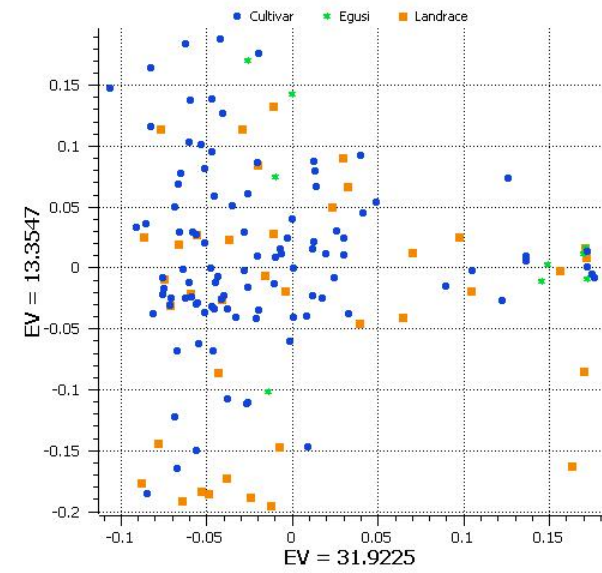

## Leucine

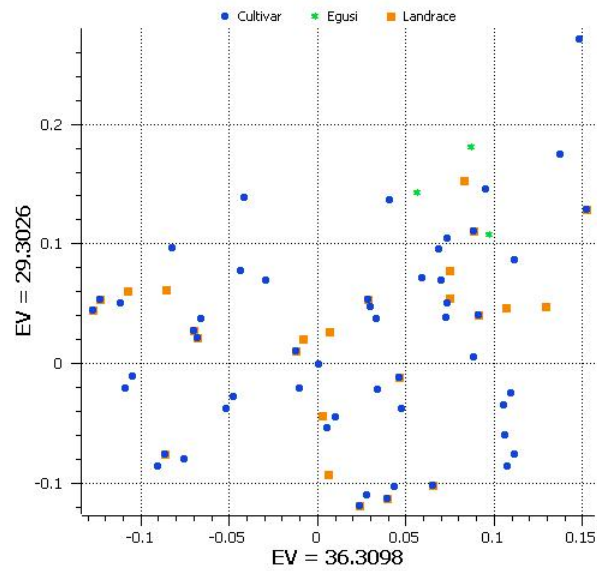

## Phenylalanine

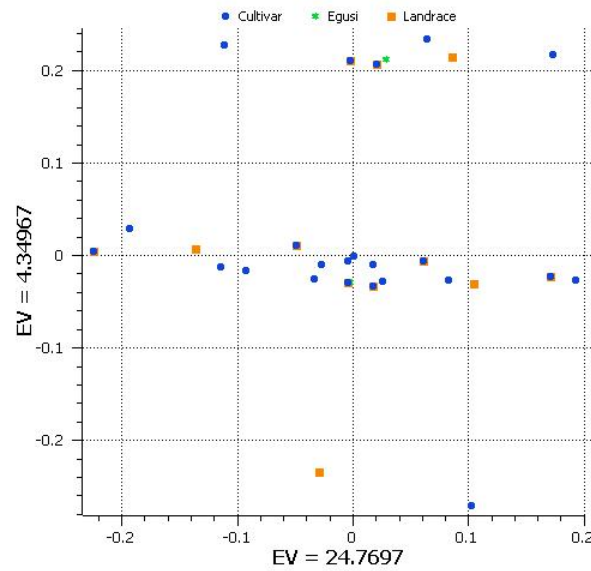

## Ethanolamine

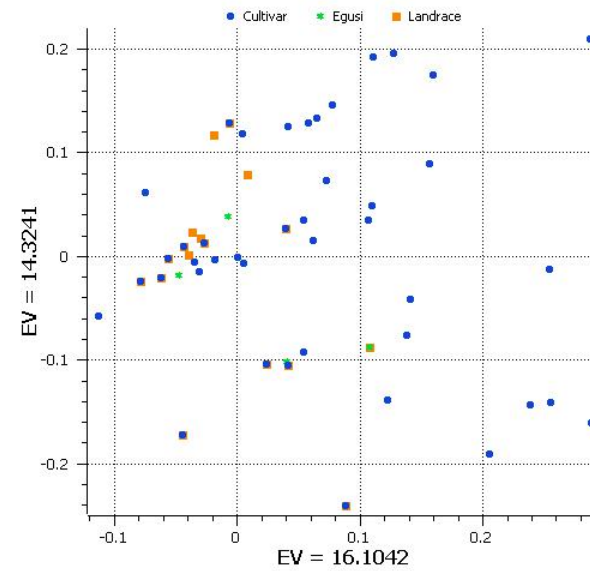

## Hydroxylysine

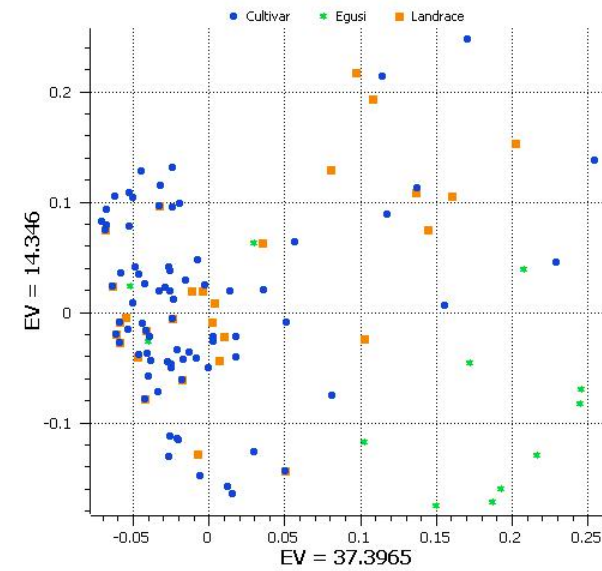

Supplemental Figure S9. Principal component analysis (PCA) for amino acids showing the components of population genetic variation

### Alpha Aminoacidic Acid

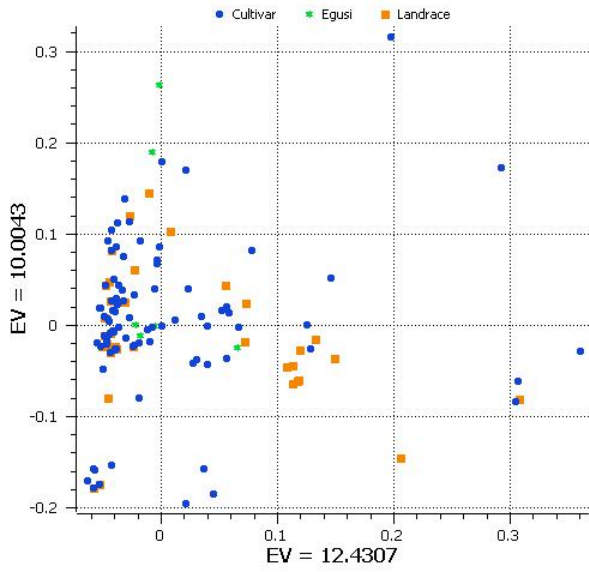

### Kynurenine

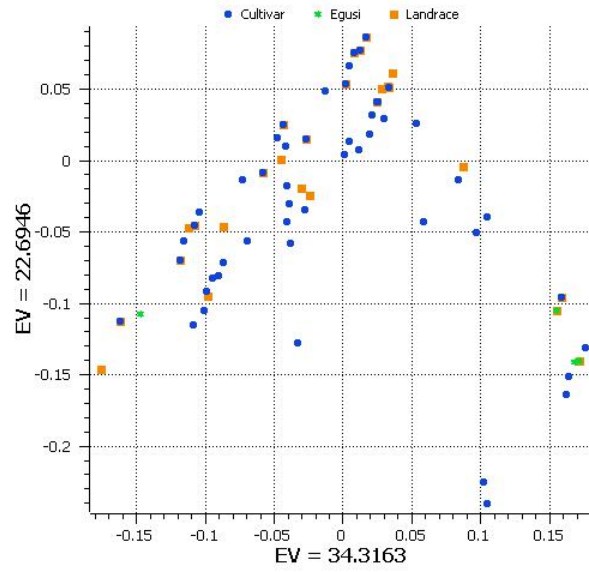

### Tryptophan

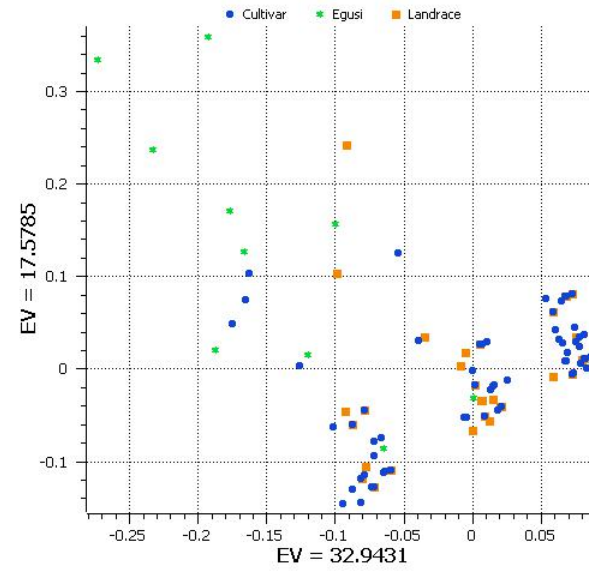

### Argininosuccinic Acid

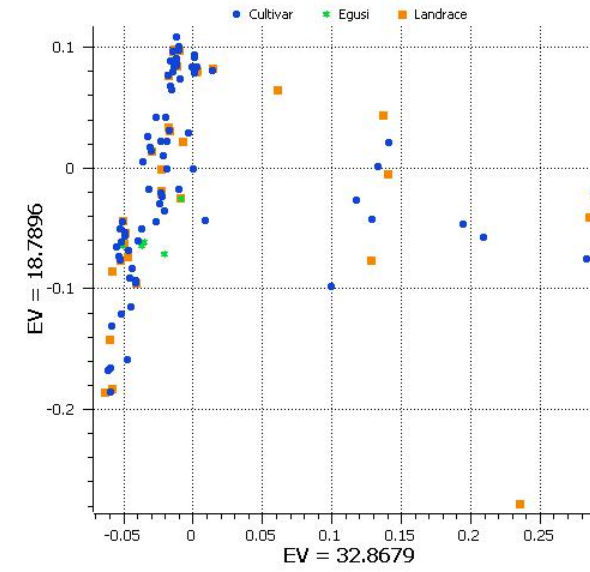

Supplemental Figure S9. Principal component analysis (PCA) for amino acids showing the components of population genetic variation
