# Supplementary material for: Genome-wide association study and population structure analysis of seed-bound amino acids and total protein in watermelon
Source: PubMed Central journal article supplement (PMC8533027; doi:10.7717/peerj.12343), 2021-10-19
Supplement: peerj-09-12343-s010.pdf [file peerj-09-12343-s010.pdf]

## Total Proteins

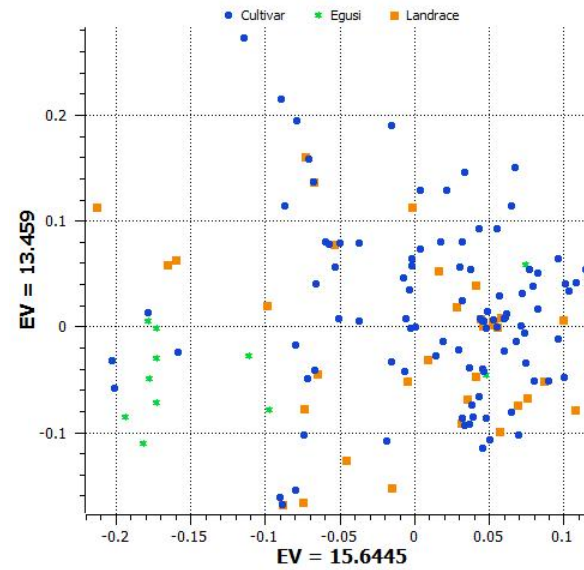

Supplemental Figure S10. Principal component analysis (PCA) of total proteins showing the components of population genetic variation
