# Supplementary material for: Genome-wide association study and population structure analysis of seed-bound amino acids and total protein in watermelon
Source: PeerJ. 2021 Oct 19;9:e12343. doi: 10.7717/peerj.12343 (PMC8533027; doi:10.7717/peerj.12343)
Supplement: Supplemental Information 11 [file peerj-09-12343-s011.xlsx]

## Sheet: Percent AA
Supplemental Table S1: Mean percent distribution of seed amino acids in watermelon accessions
		Histidine		Arginine		Asparagine		Glutamine		Serine		Glutamic Acid		Aspartic Acid		Citrulline		Threonine		Glycine		Alanine		GABA		Proline		L-Ornithine		Cystine		Lysine		Tyrosine		Methionine		Valine		Isoleucine		Leucine		Phenylalanine		Ethanolamine		Hydroxylysine
Accession ID	Seed IDs	Mean	Std Err	Mean	Std Err	Mean	Std Err	Mean	Std Err	Mean	Std Err	Mean	Std Err	Mean	Std Err	Mean	Std Err	Mean	Std Err	Mean	Std Err	Mean	Std Err	Mean	Std Err	Mean	Std Err	Mean	Std Err	Mean	Std Err	Mean	Std Err	Mean	Std Err	Mean	Std Err	Mean	Std Err	Mean	Std Err	Mean	Std Err	Mean	Std Err	Mean	Std Err	Mean	Std Err
PI 254742	W-126	1.95947	0.0122933	29.5768	0.134464	1.98245	0.0197173	0.709456	0.0101824	3.37726	0.00644629	27.7991	0.221585	6.70067	0.0726412	6.13693	0.0352377	0.742462	0.00558985	1.23719	0.0173507	4.0137	0.0424191	2.29625	0.021497	0.593562	0.00375975	1.39119	0.0174503	0.242688	0.000905845	1.30506	0.0211859	1.39288	0.0281596	0.393712	0.00402305	1.01484	0.00181698	0.348978	0.00391778	0.603444	0.00497058	0.901051	0.00566103	1.58669	0.0294179	0.237762	0.00213272
PI 249009	W-127	1.43143	0.00811328	25.2471	0.142679	1.53406	0.00546305	1.31405	0.00371662	3.20509	0.00630502	34.1079	0.179505	6.18627	0.00966496	0.857083	0.00160782	0.860076	0.000501951	1.40936	0.00356824	2.67122	0.0279172	6.53454	0.0284636	0.569525	0.00472096	0.390583	0.00103274	0.386434	0.0015467	1.0554	0.00483085	1.05121	0.0035689	0.337013	0.00130874	1.17836	0.00531857	0.470382	0.00155143	0.832638	0.0058488	2.48702	0.00584007	2.51171	0.108942	0.332844	0.00475338
PI 184800	W-129	1.32964	0.00542657	11.1171	0.126068	2.08779	0.00386122	2.55391	0.00844344	3.60643	0.0120041	22.5843	0.121667	3.11457	0.0102083	0.187902	0.00033395	2.14697	0.00192611	4.77031	0.0447173	4.3971	0.0219906	18.4935	0.113132	2.15156	0.015759	0.15488	0.000462284	0.236711	0.000123449	2.93789	0.0128698	1.91536	0.00522309	0.746265	0.00267304	3.14238	0.0115504	2.13394	0.0232183	3.56181	0.0107996	2.04317	0.00911016	1.37314	0.0851407	0.120071	0.000946596
PI 494529	W-137	1.26142	0.00637086	23.1629	0.201555	1.39855	0.00644795	0.431926	0.00164122	1.75348	0.00258981	39.7356	0.184118	6.07214	0.0943498	1.33755	0.00605649	0.888891	0.00214272	1.00435	0.00175276	3.38169	0.0287986	5.13909	0.015267	1.04179	0.00989584	0.385977	0.00219709	0.479403	0.00282843	0.924388	0.00225299	1.01074	0.00601052	0.405408	0.0013645	1.24795	0.00246388	0.622522	0.0120636	0.893347	0.00207665	2.00434	0.0229035	1.73483	0.0508933	0.309376	0.00107355
PI 595203	W-138	0.776976	0.00529788	9.74624	0.0877946	0.809428	0.00464323	0.285785	0.00292566	0.862988	0.00564745	52.185	0.208762	12.2183	0.0987654	0.0883083	0.000940879	0.64622	0.00503922	0.934383	0.014706	5.82368	0.0524142	2.10902	0.0271616	0.496354	0.00781202	0.190764	0.000248431	0.33005	0.00142891	0.775925	0.00446184	0.919623	0.00719111	0.169404	0.000982044	0.847809	0.00709643	0.33884	0.0067408	0.231985	0.116007	2.23846	0.0225019	3.4595	0.0446734	0.267241	0.00221371
PI 560010	W-139	4.4785	0.103839	22.2362	0.0376139	1.63761	0.00227351	0.415842	0.0101145	3.24161	0.0230943	29.8366	0.0581917	6.42109	0.044904	0.590454	0.00181861	1.12897	0.00714378	1.568	0.0265466	6.07022	0.0333956	2.33024	0.0159131	0.768824	0.00976224	0.730027	0.00223811	0.188863	0.00191479	5.92497	0.033774	1.36796	0.0243048	0.396199	0.00598498	1.92303	0.0134042	0.263802	0.263802	0	0	1.94275	0.0430649	2.74538	0.0748797	0.12135	0.000788105
PI 560005	W-140	17.6685	0.0412087	14.0006	0.0155399	0.689277	0.00297959	0.173194	0.000923154	1.64335	0.00562206	29.1681	0.041809	5.67347	0.0232881	0.295478	0.00144954	0.648331	0.00356482	0.377321	0.00667	0.937312	0.00426198	1.55296	0.0164523	0.578362	0.00460772	0.163198	0.00154166	0.279387	0.00206888	0.698234	0.00411624	1.45122	0.010996	0.240869	0.00146829	0.829621	0.00466467	0.167252	0.083644	0.118613	0.118613	4.76124	0.0523805	1.25646	0.0523376	0.206462	0.00100624
PI 560004	W-141	3.5849	0.039639	15.3996	0.131986	1.39854	0.00534482	0.153035	0.000686159	3.5816	0.00236665	40.9203	0.354103	9.5815	0.0396318	0.404997	0.00172818	0.989199	0.00315874	0.58134	0.00382448	4.03965	0.036973	1.38035	0.0101883	1.03172	0.00900005	0.338384	0.00120896	0.379123	0.00195144	0.794861	0.002407	1.26728	0.0101129	0.439616	0.00116899	1.71635	0.00516582	0.670913	0.00203141	1.01746	0.00144329	2.25025	0.00747882	4.23444	0.239562	0.339488	0.00567791
PI 560003	W-142	1.40053	0.00892296	24.4467	0.0887774	1.16691	0.000849447	0.792873	0.000430818	4.43465	0.0255251	36.3545	0.196347	7.83934	0.0257189	1.43409	0.00697458	0.680409	0.00289244	1.15149	0.017657	4.61127	0.0345454	3.26938	0.0172186	1.38926	0.00829585	0.367476	0.00167031	0.399433	0.00195132	0.735227	0.000804697	0.945118	0.00292918	0.39253	0.000996178	1.11361	0.00560553	0.482693	0.00626267	0.530127	0.26521	2.10548	0.0105057	1.0829	0.00599126	0.312029	0.00179739
PI 494531	W-143	1.88936	0.0110214	14.6528	0.188561	0.901798	0.00630425	0.479928	0.00163043	7.7465	0.00808645	31.954	0.0566935	21.0898	0.0554295	0.230242	0.00159296	0.520554	0.00383716	1.75968	0.014799	2.56472	0.00978416	1.33402	0.0409487	0.415598	0.00817723	0.226241	0.00182387	0.366566	0.00285516	0.682714	0.00658988	1.02314	0.00167306	0.290078	0.000536444	1.23099	0.00571442	0.0942218	0.000937518	0.216189	0.216189	3.311	0.010494	4.4688	0.110429	0.32874	0.00277232
PI 560014	W-144	2.03378	0.0214076	18.981	0.0667663	0.826522	0.00419769	0.256691	0.0146697	1.45952	0.018039	50.3833	0.21342	2.73791	0.00596966	0.406142	0.0170574	0.797801	0.0031956	1.03501	0.0135613	2.28601	0.0144412	4.70385	0.0150513	1.0344	0.0137497	0.291162	0.00264011	0.396435	0.00198773	0.831129	0.00215884	1.57712	0.0116064	0.379443	0.000961211	1.56501	0.00347866	0.190402	0.144972	0.508926	0.254508	1.84483	0.0174304	1.38412	0.0126754	0.252263	0.00287057
PI 560013	W-145	1.5103	0.0413547	17.1228	0.283075	0.837043	0.00819895	0.446112	0.00276486	2.87516	0.0316124	44.1912	0.0961179	11.0977	0.16018	0.204209	0.00234274	0.6548	0.005613	1.61383	0.016003	2.30748	0.0150537	6.14288	0.180162	0.572313	0.0058728	0.235111	0.00334339	0.376983	0.0049235	0.626401	0.0110564	1.0812	0.0279516	0.221124	0.00304237	1.1555	0.0180565	0.0584758	0.0292404	0	0	2.76401	0.0421757	0.831268	0.0427645	0.252246	0.0016021
PI 560011	W-146	6.11161	0.119249	16.1283	0.220904	1.65512	0.00662373	0.532443	0.00211654	5.27883	0.0289266	17.0494	0.0706359	20.8033	0.0822792	0.640207	0.000670757	1.31645	0.00189248	2.18623	0.0289474	9.32156	0.0166075	1.92747	0.0165901	0.267449	0.00193587	0.280225	0.000866474	0.213567	0.000536275	1.76373	0.006821	2.21837	0.00602329	0.312815	0.00162239	1.84858	0.00953805	0.027891	0.027891	0	0	3.20643	0.00732831	2.97721	0.0435903	0.142346	0.0113563
PI 560009	W-147	0.969763	0.00777071	13.0208	0.0477125	0.764373	0.00312439	0.442588	0.00230575	3.76702	0.0108424	42.3251	0.288226	15.9162	0.0799622	0.193814	0.00177799	0.546912	0.000230774	1.01973	0.00731349	3.19905	0.021361	4.59417	0.0166208	0.40834	0.00682007	0.207473	0.00147758	0.397084	0.00168975	0.410387	0.0031707	1.1031	0.0123643	0.199896	0.000306962	1.21574	0.00271161	0.0846383	0.000846955	0	0	2.76033	0.0269055	1.12322	0.0874938	0.259465	0.0192352
PI 560015	W-149	1.30261	0.0263299	15.1138	0.369527	0.956887	0.00492678	0.557249	0.00464651	3.00113	0.016564	39.8869	0.0414469	18.0621	0.146301	0.437128	0.00234233	0.626567	0.00557059	1.08063	0.0084237	4.01121	0.0403417	3.79884	0.115648	0.489525	0.00821218	0.215157	0.00279515	0.303798	0.00573313	0.600539	0.00893164	1.18994	0.0293929	0.167441	0.00332283	1.32294	0.0291294	0.05632	0.0281601	0	0	2.95886	0.0773947	1.1724	0.0472901	0.174742	0.00507457
PI 560012	W-150	3.03209	0.104074	16.4623	0.244168	1.26443	0.0153544	0.242756	0.00321392	2.86879	0.0218736	44.2166	0.309799	5.40678	0.0668366	0.317288	0.00177035	1.42888	0.0107027	0.630186	0.0157469	3.24849	0.0167915	2.68898	0.077573	1.5357	0.0169218	0.330732	0.00150938	0.339781	0.00144089	1.00104	0.0187183	1.54384	0.0386342	0.565008	0.00800157	1.96499	0.0332902	0.464356	0.232227	0.848572	0.0134494	2.35214	0.0454652	1.27162	0.0677628	0.231532	0.000643472
PI 560001	W-151	7.34507	0.0268204	14.3862	0.224228	2.16807	0.00980071	1.43739	0.00659732	5.92968	0.00300973	28.9584	0.0466421	10.3163	0.0602569	0.514999	0.00451395	1.76563	0.0199542	0.722092	0.00245499	1.90371	0.0162086	0.801345	0.00558813	1.30648	0.00397281	0.277349	0.00162389	0.240698	0.00118135	3.49421	0.00717569	1.854	0.00409145	0.790632	0.00301419	3.43223	0.00388926	1.77692	0.00966361	1.94673	0.0126227	3.02576	0.0284559	3.20635	0.0554983	0.100154	0.000592689
PI 532733	W-157	1.0472	0.0294157	20.8152	0.612743	0.717818	0.00789921	1.48876	0.0101435	2.88153	0.0343087	40.0784	0.377092	11.4017	0.0456922	1.73169	0.0166135	0.685604	0.00599903	0.973858	0.00262255	2.57449	0.0330731	5.84918	0.205375	0.749698	0.0124975	0.489101	0.00396323	0.305433	0.00412891	0.771823	0.0125221	0.739905	0.0189293	0.229917	0.00442396	0.914329	0.0159761	0.344203	0.00366886	0.446162	0.0100878	1.6261	0.0381017	0.995964	0.020537	0.16056	0.00217857
PI 532732	W-158	0.60162	0.00329473	12.4754	0.0870174	0.645139	0.00214287	4.31805	0.0157211	2.35214	0.00325156	37.1235	0.103428	20.3742	0.0557518	2.54936	0.0230348	0.451227	0.000453234	0.796571	0.00692437	4.74282	0.0175682	5.18416	0.0280059	0.375434	0.00186252	0.444416	0.00260939	0.212956	0.000655828	0.401078	0.00255764	0.581246	0.000759254	0.120328	0.000157458	0.750861	0.00166576	0.136967	0.0684843	0.364718	0.000801572	1.03584	0.00600352	1.4139	0.0621638	0.131003	0.00609344
PI 532730	W-159	1.01453	0.00790241	13.5341	0.0439531	1.33159	0.00928168	7.75025	0.0295493	3.06481	0.00519005	35.0446	0.164353	5.96513	0.0149545	1.98145	0.00312978	1.68258	0.00865893	1.0151	0.0107336	2.61634	0.00468947	3.95341	0.0269829	1.82731	0.0210585	1.3362	0.00122669	0.243663	0.00118647	1.56256	0.00762263	1.44027	0.0128893	0.479738	0.00139726	2.34367	0.00566202	1.42797	0.0172798	1.77814	0.00678151	1.6604	0.0092069	0.538542	0.0305121	0.148971	0.00896694
PI 532722	W-160	1.65035	0.00853977	20.9335	0.12706	0.836899	0.00316917	0.893624	0.0032108	2.23196	0.00705226	33.6466	0.257137	7.55672	0.0620574	3.08135	0.00740925	0.712691	0.00213035	0.480584	0.00355228	2.77969	0.0286163	2.17341	0.0176358	0.47103	0.00626569	0.854897	0.00481647	0.410495	0.00241115	0.58916	0.00299679	1.66765	0.00247404	0.354734	0.00156636	0.725748	0.00285639	0.260188	0.00160135	0.315612	0.00252612	2.73103	0.02791	1.46226	0.0806589	0.23545	0.0101076
PI 532723	W-164	1.61469	0.00365467	24.1054	0.0828384	0.933563	0.00766811	0.918815	0.00311678	5.87804	0.00952816	29.7827	0.192559	10.6623	0.0568045	0.410903	0.00359033	0.875413	0.00163334	2.83139	0.0223634	3.08916	0.00946758	0.794484	0.0245473	0.357951	0.0075575	0.321156	0.00346966	0.457257	0.00388518	1.63488	0.0197197	1.5293	0.00480862	0.481114	0.00132827	1.82941	0.00734741	0.500553	0.00344803	0.670958	0.00579284	3.67511	0.0406133	2.86072	0.134834	0.291848	0.0158156
PI 326516	W-176	1.86273	0.0201375	23.8228	0.125384	1.31417	0.0065803	0.387621	0.00569076	3.36049	0.015749	33.4379	0.199863	5.80484	0.0131353	0.938862	0.0159529	1.38875	0.00480974	1.68714	0.025752	4.66026	0.0110855	4.36213	0.0178886	1.18986	0.00709675	1.61153	0.00249783	0.50358	0.00304413	1.19059	0.00282322	1.46524	0.00381558	0.495459	0.00141344	1.68693	0.00742048	0.707983	0.0147268	0.811486	0.00780117	2.22863	0.0131757	1.62379	0.0697119	0.330552	0.00117957
PI 490386	W-177	1.39416	0.0139233	34.074	0.710312	1.32704	0.00146835	0.262924	0.00463942	1.9848	0.0174738	36.9647	0.349194	8.79616	0.0481767	0.113454	0.00188646	0.535083	0.00599817	0.60088	0.0146419	1.3754	0.0273916	1.44796	0.212595	0.456976	0.00144207	0.275746	0.00543007	0.614687	0.0117013	0.520641	0.0159479	0.939769	0.0323681	0.32123	0.00816216	0.744659	0.0237848	0.119426	0.00448342	0.248379	0.0106226	1.33902	0.0412018	0.734567	0.102614	0.371539	0.0122317
PI 490384	W-178	1.14424	0.00751062	26.9303	0.135817	0.557238	0.00035487	0.471678	0.000548992	1.65068	0.00741884	41.5889	0.107467	10.545	0.0547284	0.0623669	0.00147587	0.814641	0.00135516	0.58987	0.00805856	2.38679	0.034249	1.7664	0.0184482	0.55399	0.00527361	0.214638	0.00138425	0.45066	0.00169992	0.911087	0.00973462	0.772585	0.00207994	0.292944	0.000584276	1.11845	0.00243427	0.315051	0.00350639	0.481836	0.00167406	1.92812	0.012735	0.444332	0.0253163	0.250529	0.00108089
PI 490381	W-179	1.1522	0.00455704	31.9462	0.347541	2.16097	0.00993219	1.23135	0.010764	1.82805	0.0115597	30.5167	0.208226	7.18199	0.0592118	2.76143	0.0180225	1.25227	0.0052107	0.895618	0.0112779	2.42473	0.00957036	5.95489	0.0460576	0.65526	0.00594919	1.01566	0.00597297	0.388741	0.000828077	0.817394	0.00696915	0.897808	0.00209144	0.394977	0.00215135	1.24073	0.00456407	0.300209	0.00268928	0.503447	0.00434419	1.20831	0.00765794	1.0297	0.0154307	0.22382	0.00514074
PI 490380	W-180	1.25034	0.0206202	20.0439	0.208517	1.37983	0.0109098	0.655103	0.00110424	2.14653	0.0185844	35.4023	0.126391	4.83441	0.0349284	0.0818664	0.00194525	1.44942	0.00807353	2.20712	0.022687	3.20617	0.0288033	14.8029	0.170791	1.44655	0.0177223	0.276684	0.00263213	0.324125	0.00178341	1.07125	0.0197081	1.34551	0.0331411	0.332551	0.00399089	1.83934	0.00987484	0.604832	0.00248661	0.831558	0.00392882	1.68352	0.0306908	0.136096	0.0270757	0.175429	0.00237338
PI 490379	W-181	1.26283	0.00502659	23.7583	0.0388102	1.17484	0.0138688	1.0951	0.0116342	3.6463	0.0385247	24.7661	0.0775984	14.131	0.0138347	0.180418	0.00400909	2.23414	0.00496153	0.572402	0.0208206	2.94127	0.00240773	9.5258	0.0236116	0.770665	0.00914462	0.224901	0.00246657	0.457588	0.00225525	1.41675	0.00513931	0.830172	0.00686859	0.590265	0.00391687	1.08638	0.00678369	0.323431	0.00328244	0.590145	0.00986374	1.27197	0.00269178	3.53752	0.0226521	0.251401	0.00162436
PI 490377	W-182	1.10453	0.00461858	24.4176	0.104733	0.645808	0.00197299	0.939547	0.00306526	2.80599	0.00322928	29.2134	0.187178	13.9891	0.0334535	0.110082	0.00149863	1.53009	0.00553079	0.697255	0.00473978	2.74871	0.0107843	6.96106	0.0389	0.619902	0.00547316	0.216438	0.00234045	0.471196	0.00455263	1.32402	0.00530689	0.843006	0.00371769	0.400844	0.000991602	0.953843	0.00191539	0.265963	0.00284455	0.407193	0.00468744	1.38259	0.00741512	3.36081	0.179443	0.257013	0.00229542
PI 560020	W-183	1.63372	0.0147765	16.2411	0.149359	1.3025	0.00685073	0.836572	0.00405226	3.18072	0.0115427	39.552	0.274928	11.9202	0.0393953	0.391931	0.00257271	1.04925	0.00784205	0.930507	0.0102366	2.0292	0.0259545	6.02201	0.0903421	0.962762	0.0068105	1.21838	0.00458513	0.355936	0.00198039	1.01925	0.00296799	1.13457	0.0117063	0.471329	0.00103226	1.53048	0.0101406	0.620515	0.00235144	0.810778	0.007043	2.4965	0.00642227	1.41781	0.0717026	0.246147	0.00155503
PI 560016	W-184	2.35282	0.0336979	20.9005	0.573334	0.861619	0.00497815	1.01951	0.00270491	2.65561	0.0171247	40.8219	0.116458	8.97674	0.0744609	0.103013	0.00231533	0.753902	0.0121624	0.492534	0.0149046	1.52286	0.0173868	1.77965	0.0406495	0.468974	0.00542433	0.161661	0.00266086	0.313554	0.00633794	1.00705	0.0131275	1.66976	0.0451233	0.22262	0.00419322	0.9517	0.0183535	0.150184	0.00490572	0.237968	0.00439085	2.69939	0.0559192	1.44481	0.0751442	0.231995	0.00562434
PI 560008	W-185	1.63186	0.0540219	18.1131	0.332307	2.69505	0.0212978	0.362544	0.00244559	1.9692	0.0380939	43.3423	0.253502	5.81385	0.0552821	1.05814	0.00938764	1.65149	0.00951601	0.578661	0.0219158	1.44235	0.0181818	1.36898	0.213087	0.952965	0.0159835	0.387649	0.00341898	0.481714	0.00437012	1.20733	0.00830755	1.90898	0.0362692	0.609365	0.00951771	2.00067	0.0402484	0.827076	0.0145043	0.88671	0.0217257	3.64742	0.0868561	3.24	0.0538997	0.270908	0.00363951
PI 560007	W-186	1.32024	0.0382124	16.8366	0.481582	0.753441	0.00790896	8.22531	0.0196806	3.71267	0.0105319	36.1089	0.313375	12.4543	0.0981287	1.32882	0.0101631	0.351784	0.00416935	1.80887	0.0196707	2.60639	0.0398544	5.28161	0.182366	0.456975	0.00196303	0.353531	0.00558647	0.257877	0.00482781	0.491128	0.0109624	0.782419	0.0200596	0.137681	0.00251446	0.594093	0.0116242	0.152252	0.00181044	0.235324	0.00684597	1.53507	0.0373546	1.56387	0.1055	0.147311	0.00336435
PI 560002	W-187	8.04461	0.133747	18.5948	0.179746	0.760448	0.00123131	1.40297	0.00179244	2.36107	0.0253737	25.357	0.110387	16.5933	0.0440262	2.35127	0.0111036	0.567218	0.00504537	0.787665	0.0137412	3.02443	0.0237421	7.26249	0.0551791	0.426823	0.00191401	1.49203	0.00471263	0.286611	0.000936672	0.537863	0.0014968	0.829035	0.0050387	0.223039	0.000740723	1.15855	0.00703396	0.385494	0.00143277	0.56906	0.00382831	2.50404	0.0171249	1.95184	0.103816	0.198711	0.00199472
PI 494528	W-188	0.9733	0.00897117	14.08	0.0496146	1.32447	0.00843252	0.901386	0.0114505	2.67197	0.00387951	40.1462	0.216173	14.2406	0.0380541	0.909345	0.00406198	0.87208	0.000791972	0.73064	0.00422884	2.97518	0.0267849	6.51421	0.0505382	0.53974	0.00190568	0.603364	0.00301246	0.414778	0.00101604	0.674243	0.00547652	0.752076	0.00294198	0.239701	0.000685671	1.27731	0.00524476	0.158316	0.158316	0.489949	0.00226667	2.1827	0.0139347	3.19971	0.0562649	0.226512	0.000775579
PI 494527	W-189	13.0635	0.823497	17.1727	0.755629	1.38799	0.0339459	2.94279	0.0755824	2.87286	0.103024	25.2515	0.690298	4.34607	0.148145	1.06178	0.0207036	1.13676	0.0185215	1.09253	0.0259891	8.36889	0.171782	3.93602	0.0296321	1.42631	0.0217052	1.51799	0.0408438	0.269877	0.00435647	1.50443	0.0276065	1.40758	0.00226874	0.407731	0.00329422	2.00998	0.0369453	1.01302	0.0132046	1.39076	0.0302949	2.93301	0.0527996	1.02777	0.00679639	0.155633	0.00978654
PI 457916	W-190	1.21943	0.00872088	17.9027	0.130591	0.615835	0.0028632	0.556752	0.00402394	5.52716	0.0437706	35.7992	0.232143	18.1818	0.129505	0.159633	0.000983503	0.526708	0.00135489	0.801317	0.0153268	4.22009	0.00646674	3.23101	0.00443849	0.275164	0.00448995	0.414107	0.00169646	0.358549	0.00304525	0.574897	0.00377436	0.794913	0.00555764	0.201186	0.0010524	1.27802	0.00553054	0.343289	0.00129102	0.410765	0.00719948	1.87885	0.0160579	1.82047	0.140104	0.253874	0.00167215
PI 306782	W-192	9.80059	0.0857183	21.7529	0.341399	1.1769	0.00546681	0.996296	0.00562915	3.13852	0.0238245	34.2334	0.414618	6.83816	0.0239682	1.85164	0.0240299	0.645699	0.00790642	0.833233	0.00944361	2.26431	0.0215605	2.70067	0.0535562	0.780442	0.00411966	0.808405	0.0030384	0.366215	0.00220965	0.989233	0.00525707	0.932248	0.0169756	0.310801	0.000893686	1.17425	0.00476478	0.281066	0.00224275	0.39243	0.00265792	2.57953	0.0270807	1.57594	0.307176	0.253746	0.0238928
PI 254743	W-193	0.833966	0.0101547	20.0241	0.127023	0.850744	0.00373128	0.620951	0.00169029	3.60636	0.0110147	38.0531	0.170957	6.07449	0.0271699	0.434069	0.00343938	1.14609	0.00543116	1.57493	0.0176469	7.6385	0.0701282	6.81606	0.0875411	0.601658	0.00609684	0.407193	0.00589296	0.358964	0.00204695	0.966759	0.00515836	0.687967	0.00674139	0.26285	0.00174258	1.2033	0.00968082	0.381141	0.00744373	0.383911	0.00369746	1.38815	0.00471082	3.21715	0.16419	0.230183	0.0167293
PI 254741	W-194	1.29297	0.0116002	23.7994	0.0756622	2.05446	0.016979	0.253366	0.00107826	1.10696	0.00183041	41.8856	0.075127	7.07415	0.0166295	0.361596	0.00252079	0.640867	0.0066689	0.678845	0.0095318	2.31313	0.0192129	2.95606	0.00929815	0.290303	0.00324109	0.249304	0.00255131	0.508027	0.00343896	0.428429	0.00160912	1.42805	0.00677761	0.264045	0.00079053	0.746189	0.00314856	0.072933	0.0364728	0.215223	0.00662902	1.55629	0.00544385	0.758001	0.0415904	0.381302	0.00184902
PI 254740	W-195	0.631761	0.00887633	19.2995	0.287017	1.49913	0.00795864	0.63935	0.00196872	3.84015	0.00450485	24.3483	0.104199	10.4451	0.0418736	18.1012	0.0988082	0.899018	0.00263597	1.13463	0.0124215	2.95762	0.00375448	3.50979	0.0051638	1.29169	0.00701721	0.37174	0.00248231	0.331985	0.00237859	1.10739	0.000828195	0.726302	0.00316633	0.255386	0.00147005	0.760582	0.00584462	0.338123	0.00250376	0.279967	0.00350597	2.66783	0.0322141	1.33033	0.0267069	0.265017	0.00290258
PI 254737	W-196	1.26137	0.00829329	15.2941	0.0124134	1.27961	0.00623041	2.11454	0.0113318	4.02574	0.0943043	28.9087	0.28042	13.0995	0.0549747	0.144463	0.0169009	2.02133	0.0097612	1.07578	0.0364947	5.46739	0.032935	8.80037	0.0297586	0.852065	0.0095813	0.207944	0.0291031	0.258836	0.000989516	1.30008	0.0135267	1.02674	0.0087191	0.463657	0.00162899	2.07537	0.00648404	0.82115	0.00253743	1.07062	0.00239712	1.23704	0.0126794	4.1556	0.118943	0.152718	0.00815285
PI 254736	W-197	0.880993	0.00146872	24.2749	0.193261	1.03106	0.00393147	0.673121	0.00960188	1.7462	0.0324108	45.9345	0.225312	7.52417	0.0349256	0.0495283	0.00113922	0.991669	0.00519273	1.01009	0.0106693	1.77553	0.0147075	1.43555	0.00670771	0.685112	0.00681759	0.208618	0.00108905	0.465262	0.00104843	0.93315	0.00282046	0.996929	0.00307091	0.38534	0.000842618	1.2228	0.004107	0.467879	0.00224252	0.479521	0.00798766	2.24114	0.00540974	1.54073	0.0914974	0.371828	0.00222208
PI 254735	W-198	1.01686	0.00116557	28.4306	0.19812	0.724497	0.00383363	0.359693	0.00452415	1.23239	0.00623992	44.3567	0.131709	7.4087	0.0104775	0.134238	0.000925973	0.612383	0.000661913	0.956007	0.0141542	1.60807	0.0101733	2.1956	0.0297968	0.296952	0.00320474	0.264854	0.00137886	0.560458	0.00412758	0.480896	0.00410377	1.1204	0.00457039	0.388234	0.00240601	0.672003	0.0055435	0.154104	0.000676909	0.200234	0.00201936	2.09873	0.0304968	1.14267	0.106712	0.454217	0.00640398
PI 248178	W-199	2.41069	0.0114859	14.5433	0.0475702	1.61687	0.00536506	1.10591	0.00534577	4.43272	0.00491365	36.4566	0.383533	13.4707	0.0736766	0.864796	0.00183634	1.3883	0.00600288	0.834802	0.00484304	2.66942	0.0342706	2.54824	0.250078	0.662116	0.0074342	0.279378	0.00263309	0.443633	0.00598182	1.10083	0.0115591	1.08071	0.00490116	0.333027	0.00240142	1.81663	0.00857727	0.56174	0.00627603	0.519225	0.0111042	2.11905	0.0419289	2.71117	0.241729	0.349657	0.00458423
PI 247398	W-200	0.693647	0.00731077	23.7919	0.315522	0.822433	0.00289192	0.140648	0.00314869	2.41224	0.0161626	40.6113	0.387295	5.66252	0.0512685	0.159095	0.00172764	0.800824	0.00533783	1.25069	0.015318	5.88334	0.0249144	1.81236	0.0121463	0.246051	0.0024383	0.255159	0.00386757	0.451209	0.00558231	0.758335	0.00441478	1.1879	0.00530083	0.492387	0.00055766	0.705415	0.00209857	0.149326	0.00310508	0.260273	0.00565192	2.85894	0.0594158	4.41572	0.200897	0.369924	0.000379642
PI 189318	W-201	1.0352	0.0248431	13.4071	0.247917	1.15969	0.0186906	0.514496	0.00489536	4.39905	0.0562953	38.7754	0.29022	15.8235	0.204387	0.278705	0.00312093	0.989587	0.00609165	1.36669	0.0234793	2.66526	0.0741832	7.43854	0.460128	0.495372	0.0047465	0.225662	0.00445505	0.320715	0.00598659	0.362229	0.00857339	1.15987	0.0169705	0.296778	0.00261653	1.41724	0.0142846	0.4255	0.000700002	0.549145	0.0199824	1.67926	0.0419914	2.10265	0.112734	0.168573	0.00334322
PI 186975	W-202	1.34378	0.0409962	17.0825	0.436186	1.12004	0.00581375	1.50676	0.00249522	5.12986	0.0329779	41.4795	0.175001	9.29253	0.109503	0.58505	0.00610462	0.796798	0.0142888	1.4107	0.0209299	6.47461	0.0594093	1.58642	0.0389032	0.778622	0.00533789	0.410563	0.00587273	0.422134	0.00632348	0.726202	0.0147195	0.754098	0.016666	0.26864	0.00433154	1.65335	0.029093	0.111709	0.111709	0.504459	0.0120971	2.26054	0.0481368	1.40253	0.0521261	0.275624	0.0193156
PI 186489	W-203	1.39434	0.0105816	19.1727	0.146211	0.787093	0.00340224	0.464512	0.00350572	3.05828	0.00781572	43.2448	0.326509	9.56606	0.0428744	0.263542	0.00189796	0.618106	0.00636935	1.04989	0.00655289	2.17359	0.0216582	5.46608	0.0299558	0.67571	0.00712191	0.458549	0.00323775	0.443813	0.00260067	0.421307	0.00106121	1.0411	0.00722803	0.344352	0.000943367	1.12617	0.00326281	0.314833	0.00175605	0.358739	0.00425266	1.98524	0.00539498	2.28156	0.103296	0.316238	0.00105276
PI 164248	W-204	0.875866	0.0265736	22.0795	0.722473	1.95191	0.0269175	1.62193	0.0019749	2.73283	0.0250829	11.5074	0.0195441	3.8353	0.0393628	1.09546	0.0149155	1.73102	0.0169303	5.49835	0.068987	8.80631	0.00508567	15.4378	0.385469	2.29449	0.00501065	0.488796	0.00445307	0.205861	0.00142633	2.38588	0.0318413	1.90105	0.0346599	0.669164	0.0093642	3.12548	0.0515711	2.05957	0.0339313	2.98065	0.056123	2.98889	0.0648687	2.03832	0.0226562	0.115594	0.00215359
PI 482248	W-237	1.48135	0.00689683	14.1899	0.122803	2.53196	0.0143032	0.839646	0.00193823	4.19026	0.0265478	28.6186	0.0449717	17.437	0.10911	0.174407	0.00326926	1.53793	0.00611649	2.9519	0.0127236	6.91915	0.0169875	0.8497	0.0975965	0.690323	0.00568271	0.359622	0.00144075	0.397742	0.000385463	2.60089	0.0134658	1.85527	0.00468	0.523229	0.000788017	2.20505	0.00688465	0.642359	0.00495563	0.825988	0.00352597	3.17779	0.0102619	2.03085	0.0795729	0.233816	0.00116517
PI 482250	W-238	1.22403	0.00382414	15.7	0.108412	3.05114	0.017415	0.553139	0.00421495	4.65406	0.00176015	28.7861	0.222811	15.0912	0.158213	0.418263	0.00154417	1.1371	0.00174172	3.00297	0.0293748	6.17447	0.0135705	1.5516	0.0101608	0.940036	0.00656636	0.401552	0.000420686	0.279818	0.000730566	2.39154	0.0134148	1.67483	0.00991908	0.693608	0.00358569	2.21197	0.0057851	0.828931	0.0115625	0.98527	0.00202271	2.40536	0.014665	2.75125	0.162335	0.287578	0.00693881
PI 494819	W-239	1.15442	0.00497038	14.3579	0.0864112	2.46943	0.00277428	0.802893	0.000508779	2.97755	0.0146704	26.5381	0.0652092	14.2476	0.0793009	0.851779	0.00544392	1.39014	0.0042285	2.95095	0.0135813	7.58958	0.00817675	1.55687	0.00551184	0.604369	0.00236681	0.454075	0.00261703	0.276451	0.00159034	2.78318	0.0123034	2.38949	0.00934017	0.484641	0.000887018	2.17941	0.006421	0.797823	0.00131272	1.249	0.00271519	3.1634	0.02407	2.30108	0.0215357	0.265882	0.00125463
PI 494821	W-240	1.42836	0.0229646	30.6738	0.38967	4.37984	0.0317908	1.89042	0.0212035	1.37134	0.0109037	21.1403	0.068753	9.39272	0.0669709	0.876046	0.00684545	0.969786	0.00735379	2.70086	0.0154241	6.61214	0.0160936	3.87547	0.0330618	0.506022	0.00135184	0.641916	0.00182084	0.13261	0.000336399	2.52089	0.0136076	1.48371	0.0154566	0.315025	0.00398214	1.60202	0.00593462	0.403566	0.00628146	0.615041	0.00317722	2.5582	0.00334935	2.20431	0.143667	0.0817544	0.000826686
PI 500318	W-241	0.852543	0.022218	11.9205	0.202611	2.10526	0.0218392	0.276684	0.000226401	1.24963	0.00307137	38.8371	0.0585288	12.978	0.11158	0.173108	0.000866789	1.13676	0.0039983	4.59917	0.0461349	10.1779	0.0900287	1.94182	0.0375781	0.401065	0.00575551	0.323934	0.00420891	0.272244	0.0032791	1.51085	0.0331333	1.42108	0.0258465	0.419566	0.00530891	1.38584	0.0203278	0.377676	0.00894274	0.54966	0.0154642	2.67876	0.0515799	1.40303	0.02291	0.277795	0.00158218
PI 525084	W-242	1.19866	0.0188892	14.6189	0.303695	1.97517	0.0129428	0.974141	0.00787414	2.04104	0.00809019	22.5509	0.178651	24.2723	0.257857	0.478362	0.0074997	1.54417	0.0121098	3.73126	0.0747397	8.74972	0.0464283	1.0297	0.0211502	1.01901	0.0104221	0.392092	0.00679301	0.348778	0.00527951	2.02489	0.0339944	1.39736	0.0389248	0.580193	0.011489	2.25874	0.0534309	0.847237	0.012405	0.983892	0.0198291	2.75157	0.0483834	1.98257	0.0484163	0.328584	0.00367229
PI 525089	W-243	1.0106	0.00393728	12.3806	0.119666	3.35195	0.00997294	0.645802	0.00278791	6.13626	0.0372178	38.3077	0.17105	10.3633	0.0635696	0.692221	0.00879213	0.879879	0.00591148	3.21266	0.0241497	6.43859	0.0529993	2.18866	0.0112868	0.709985	0.0046154	0.484125	0.00324519	0.397736	0.00182305	1.76001	0.018828	0.960902	0.00394073	0.634697	0.00364096	1.64016	0.00892161	0.410031	0.00471427	0.551528	0.00554248	2.05793	0.0090747	2.38278	0.148126	0.355585	0.0059015
PI 525093	W-244	1.3835	0.012336	14.6672	0.0558551	2.9053	0.0211559	0.178259	0.000897763	4.68371	0.0190945	31.5105	0.165191	9.09676	0.0190047	0.95088	0.0018522	1.41463	0.0153427	3.12227	0.0203761	10.226	0.0849823	4.32532	0.00475845	0.5698	0.00762688	0.367647	0.000756955	0.294174	0.00110917	1.47887	0.00969589	1.23366	0.00991093	0.554493	0.00440831	1.4034	0.00592306	0.313185	0.0039799	0.530351	0.00531857	2.85741	0.0183793	2.08706	0.0883	0.262416	0.00418273
PI 525098	W-245	1.35988	0.00700753	10.7591	0.201379	2.36931	0.00721434	0.224724	0.000463027	8.69538	0.0281439	24.5186	0.0465413	13.0475	0.107438	0.415415	0.00214269	1.40591	0.00692023	3.2806	0.00948812	13.8989	0.0300401	4.04884	0.0372515	0.433956	0.00814775	0.319141	0.000721312	0.236807	0.000672912	1.52193	0.00670498	1.17095	0.00707626	0.437907	0.00200447	1.80203	0.00801217	0.564296	0.0067049	1.05183	0.00479288	2.71282	0.011792	2.57465	0.0272187	0.182583	0.0217287
PI 526238	W-246	1.05594	0.00266362	13.5757	0.0758914	2.23733	0.0130144	0.553526	0.00951642	2.53631	0.0350525	34.0776	0.194308	15.2942	0.0382695	0.226487	0.00481775	1.4247	0.00204205	2.90582	0.00211361	7.10286	0.0188947	1.52094	0.00494432	0.500307	0.00438043	0.355634	0.00108509	0.336124	0.00116628	2.2579	0.00418025	1.80949	0.00936907	0.475975	0.00308506	2.2138	0.0122928	0.736967	0.00848798	0.975509	0.0088928	3.15042	0.015063	1.56605	0.0991503	0.342015	0.00704077
PI 535947	W-247	1.04702	0.0164464	12.9698	0.255438	3.38695	0.0368409	0.418696	0.00329702	4.72973	0.0356856	37.4352	0.247303	11.8473	0.127427	0.459691	0.00511739	1.34282	0.0104251	2.66695	0.0545987	6.75798	0.029094	1.59702	0.0298863	0.57667	0.00473689	0.320956	0.00456937	0.259847	0.00384577	1.56791	0.0236905	1.31137	0.0287402	0.571025	0.0105256	1.547	0.0234665	0.387733	0.0099868	0.659122	0.00879214	2.63342	0.0433072	2.22644	0.157485	0.203913	0.0267303
PI 542115	W-248	1.25737	0.0166697	17.9595	0.135595	4.10804	0.0237645	0.380248	0.000830711	1.71437	0.00564616	28.3592	0.155179	10.8151	0.0529745	0.0495129	0.00134438	2.06201	0.00470783	1.91048	0.0164914	6.33951	0.0227087	4.11682	0.0241441	0.105309	0.00228636	0.287915	0.00114718	0.438899	0.00221551	1.76818	0.00289057	2.09113	0.0117372	0.606338	0.00159105	2.44728	0.0102035	0.937062	0.0135961	0.966246	0.00636286	2.82956	0.0166971	5.12235	0.30104	0.251748	0.00135614
PI 542120	W-249	1.08872	0.0151071	30.5616	0.563447	3.09675	0.0170485	2.75561	0.00730723	1.53789	0.00785556	25.2918	0.207089	8.30944	0.0763469	0.193607	0.00256173	1.11658	0.0135099	1.44123	0.045672	5.22431	0.0748691	3.05949	0.099782	0.198505	0.00562382	0.400099	0.00557581	0.344301	0.00646001	2.47526	0.0390441	1.33184	0.0344317	0.493927	0.011048	1.81145	0.0367349	0.643914	0.0180658	0.876703	0.0150917	2.16394	0.056174	3.81887	0.099978	0.193163	0.00510615
PI 559993	W-250	2.94444	0.0355021	18.1431	0.227093	2.9551	0.00847439	3.40422	0.00597245	5.12392	0.0248398	25.153	0.246596	11.2475	0.134511	1.16205	0.00675438	0.922683	0.00676105	2.9893	0.0319339	5.21866	0.0446396	0.888152	0.0167071	0.736188	0.0079107	0.494962	0.00152157	0.383071	0.000370129	1.9927	0.00972836	2.32776	0.0120446	0.726394	0.0033148	2.41613	0.00358899	0	0	0.663428	0.00858851	4.43022	0.0260206	1.67235	0.0807806	0.272682	0.0266547
PI 560000	W-251	1.22205	0.005926	11.9164	0.0794426	1.71014	0.00168565	0.710576	0.00440665	4.79447	0.0293695	29.8514	0.209368	13.5963	0.0842328	0.381438	0.00243018	1.22877	0.00822607	3.91047	0.0358212	9.09895	0.0225052	2.0052	0.27041	0.89897	0.00670662	0.324128	0.00450236	0.414235	0.00445363	2.39469	0.0118067	1.21663	0.00586758	0.701094	0.00220272	1.65341	0.00348508	0.529498	0.00425842	0.817845	0.00684005	1.99838	0.0060116	3.85119	0.16466	0.699867	0.00945152
PI 164247	W-252	1.01921	0.0149059	16.1587	0.0206645	5.82917	0.0297551	2.52552	0.0108215	1.36665	0.00479927	24.7343	0.0375312	10.9608	0.0494904	1.74185	0.0123676	1.03876	0.00154878	3.24159	0.0103879	7.12213	0.0185716	1.83173	0.0138868	0.672684	0.00417356	0.936225	0.00329846	0.149771	0.00130764	3.18706	0.0120795	1.98281	0.0110952	0.315416	0.00158697	2.17467	0.0058997	0	0	1.08354	0.0528095	3.30085	0.0203581	2.94167	0.0618526	0.1176	0.011878
PI 164248	W-253	0.868495	0.00427192	13.3957	0.114588	1.75329	0.0204194	0.253895	0.00180541	2.84716	0.0104578	29.2792	0.0622672	14.5712	0.106681	0.114727	0.00168371	1.2344	0.0100888	4.41851	0.0298878	14.0398	0.0384593	3.48733	0.384067	0.651943	0.00780813	0.236697	0.000178899	0.300058	0.00052785	2.05447	0.00445585	1.15973	0.0125352	0.286255	0.00191792	1.82276	0.0172033	0	0	0.739059	0.00382722	2.00468	0.00650491	1.45507	0.0895595	0.194155	0.00197685
PI 271752	W-254	1.00955	0.0065171	14.0999	0.0729676	3.20247	0.00756669	0.813751	0.00603666	2.99101	0.00749775	22.5429	0.138695	5.49316	0.0199453	0.532655	0.00507805	2.13024	0.0149955	2.76502	0.0185198	8.86895	0.0492059	19.0367	0.195238	1.38522	0.00929001	0.424971	0.000797122	0.208491	0.00209797	1.62184	0.0135102	1.20553	0.0101434	0.250214	0.000914228	2.41666	0.0170345	0	0	1.19599	0.0328378	2.33775	0.0149769	2.7622	0.192656	0.150236	0.00347789
PI 271987	W-255	0.892972	0.005722	16.2125	0.0707409	1.97313	0.0125593	0.229576	0.000715233	4.49807	0.0170699	31.9307	0.151711	9.52998	0.0392858	0.102402	0.00107113	0.81049	0.00541262	3.81389	0.0210461	16.7603	0.0284736	1.75687	0.00534881	0.523715	0.00286916	0.253473	0.00120651	0.35987	0.00126926	1.14701	0.00183663	0.9339	0.00585284	0.5186	0.00216991	1.27846	0.00823388	0	0	0.649519	0.00938261	1.74092	0.00758204	1.78853	0.0997365	0.317722	0.00458316
PI 306366	W-256	1.14573	0.00829364	20.4632	0.225571	2.44963	0.0141866	0.417082	0.00252505	2.12856	0.0246273	39.0737	0.155189	11.0998	0.02188	0.182229	0.00165527	0.791385	0.00507439	2.33576	0.0149556	4.36353	0.0521271	1.83393	0.0172244	0.272316	0.00892849	0.262207	0.00062455	0.374584	0.00040914	0.750359	0.00460839	1.64813	0.0172379	0.478325	0.00353765	1.1365	0.00916733	0	0	0.404349	0.0102506	3.0947	0.0229389	1.60505	0.130297	0.271719	0.0037626
PI 319212	W-257	1.52458	0.0184664	12.7439	0.0954286	3.09172	0.0213793	0.882556	0.00292036	5.43895	0.0305375	38.2439	0.126687	10.7061	0.064272	0.438592	0.00135002	1.1051	0.00684905	2.35417	0.00785853	8.26432	0.0676058	0.989295	0.00561216	0.66299	0.0107468	0.251469	0.000928971	0.204359	0.000715716	1.71105	0.0105836	1.83215	0.0161014	0.535891	0.0026099	1.64732	0.00649041	0	0	0.609297	0.00688111	1.91978	0.0189329	1.86925	0.120083	0.11858	0.000840359
PI 378611	W-258	1.41587	0.0078816	17.158	0.183348	4.11192	0.0257047	0.42114	0.00342766	6.26483	0.0184791	33.3117	0.17943	10.3323	0.0130394	0.290804	0.00215397	0.969252	0.00163355	3.81001	0.0156255	6.28513	0.0322556	1.21672	0.138154	0.278986	0.002781	0.336541	0.000860142	0.282768	0.000971836	1.59101	0.00646098	1.68017	0.0167328	0.493674	0.00212853	1.40426	0.0106561	0	0	0.453483	0.00387739	1.69162	0.00609028	1.6754	0.150804	0.207155	0.0326251
PI 378614	W-259	0.922143	0.0118354	15.4196	0.145893	4.42885	0.0199619	0.525554	0.000557511	6.56984	0.0418077	20.5122	0.0565884	9.27253	0.0106498	0.918371	0.00323103	1.19017	0.00636682	4.14648	0.024544	13.6653	0.0926893	3.65649	0.0272564	0.509398	0.00275391	0.541543	0.00108319	0.221261	0.000764937	2.2343	0.0147652	1.98102	0.00331661	0.400734	0.00143033	1.95298	0.00589086	0	0	0.851167	0.00112475	2.68008	0.0188086	2.60358	0.0314176	0.148061	0.0129999
PI 392291	W-260	1.26554	0.00640885	12.8484	0.107247	1.79166	0.0041223	0.367025	0.00256549	2.27538	0.00492862	24.0952	0.0438695	23.4264	0.0525275	0.302682	0.00125411	1.64918	0.013638	2.65089	0.0210982	6.75627	0.056251	1.20015	0.00779231	1.72954	0.0190047	0.4015	0.00200357	0.34123	0.000644193	3.44384	0.0213916	2.0273	0.00851519	0.427012	0.000771141	2.97364	0.0139857	0	0	1.12468	0.010446	4.02449	0.0199046	2.61615	0.0990621	0.264945	0.00217333
PI 459074	W-261	1.03045	0.00777866	11.8951	0.053136	3.31127	0.0100587	0.535806	0.00154246	4.11184	0.0053836	26.443	0.171788	16.1692	0.0466877	0.469662	0.00633057	1.59516	0.0113593	3.22165	0.0198582	10.0669	0.0458559	2.64289	0.0108549	1.54463	0.00736815	0.420554	0.00149468	0.170356	0.000528765	3.12706	0.0140286	1.85231	0.016322	0.510529	0.00434097	2.87198	0.0169915	0	0	1.23339	0.00905469	2.53694	0.014374	2.16532	0.166152	0.103752	0.00415696
PI 482260	W-262	1.06156	0.00787708	16.0595	0.180095	1.76786	0.00556192	0.405802	0.00298534	4.50121	0.0176834	26.4171	0.148808	13.0651	0.117053	0.182668	0.000587909	1.18099	0.00751809	4.04563	0.0267362	13.5298	0.0824285	2.1791	0.0117836	0.480093	0.00850101	0.350161	0.000764041	0.395058	0.00431821	2.19236	0.0104543	1.16262	0.0150295	0.722123	0.00287592	1.85601	0.0101452	0	0	0.818235	0.00878076	2.28964	0.00546127	2.89857	0.148763	0.293722	0.03039
PI 490376	W-263	1.14105	0.00513238	10.9102	0.0342925	3.29036	0.0156613	0.362004	0.00219521	5.5626	0.0188048	20.8137	0.0748611	16.1037	0.0502323	0.227969	0.00137291	2.20392	0.00838922	3.61332	0.0139444	12.6055	0.0440108	2.2288	0.00450639	1.2813	0.0099348	0.336815	0.0010998	0.241344	0.000526452	3.38763	0.0121363	2.11477	0.00389424	0.663665	0.00387574	2.80132	0.012243	0	0	1.62367	0.00682146	3.23404	0.00432002	2.04981	0.0831033	0.181761	0.00164713
PI 494815	W-264	1.11186	0.0104123	14.4895	0.0296773	2.77024	0.00964497	0.981838	0.0057777	5.12682	0.031361	27.1467	0.0183237	15.1061	0.0822048	0.852165	0.00193049	1.45254	0.00280634	4.57584	0.0251374	8.38441	0.0383945	1.31889	0.00837397	0.471749	0.00503625	0.524813	0.00163457	0.320475	0.00188362	2.59158	0.0114406	1.5752	0.00505888	0.601111	0.0013692	2.03418	0.00944194	0	0	0.979265	0.00403617	2.64219	0.00676088	2.4317	0.065382	0.317381	0.00254678
PI 505590	W-265	0.958013	0.00774317	11.7806	0.169135	2.53559	0.0159839	0.920636	0.00345716	4.04904	0.0113608	39.7083	0.280778	9.85087	0.0440634	0.656384	0.00365268	1.3901	0.00855504	2.94983	0.0254511	3.79524	0.0277365	1.37564	0.023	1.22715	0.00962061	0.36453	0.000855355	0.338178	0.00201813	2.39015	0.00802435	1.38084	0.017623	0.69928	0.00327543	1.98942	0.0053791	0.770872	0.00727496	0.969326	0.0100671	2.64066	0.00513528	3.48772	0.181966	0.399386	0.00359659
PI 500302	W-266	1.25588	0.00343542	13.2501	0.0513779	2.26629	0.0112401	1.27707	0.00374737	2.56533	0.0280761	32.9805	0.444967	14.463	0.105012	0.566335	0.000553439	1.55569	0.00495587	2.4277	0.00330382	4.9741	0.0249855	1.1777	0.00788917	0.955293	0.00643298	0.298233	0.0003136	0.343999	0.00187304	2.25248	0.0103937	1.84227	0.00472725	0.643813	0.00233167	2.02826	0.0147495	0.683532	0.00722787	0.927625	0.012571	3.20753	0.0144962	2.7732	0.222624	0.518588	0.0132095
PI 525095	W-267	0.714363	0.00568675	6.38758	0.0588684	1.72583	0.0062306	0.242871	0.00229767	5.49224	0.0331185	31.56	0.298435	7.53104	0.0462289	0.885183	0.00327822	1.8114	0.00570019	4.60275	0.0322197	12.3922	0.116549	4.95067	0.0457984	2.46935	0.0162273	0.387644	0.00223222	0.190657	0.000839487	1.68068	0.00992692	1.18489	0.0072603	0.513384	0.00203502	2.25153	0.00543403	0.845807	0.0064799	1.01091	0.0118191	2.02415	0.00722156	4.58686	0.277687	0.210592	0.00330996
PI 560024	W-268	1.36161	0.0154836	12.1111	0.267048	1.92975	0.00865268	1.57722	0.0182561	4.14267	0.0463951	27.5511	0.392985	9.41858	0.119597	0.602233	0.00116019	1.71654	0.00223872	3.38618	0.0691827	5.24094	0.0687705	2.93373	0.0100892	1.55692	0.0388848	0.344524	0.00361567	0.26535	0.00375417	2.51584	0.0186068	2.18851	0.0041207	0.281491	0.00184404	3.18945	0.0164337	1.39744	0.010868	1.69174	0.00682532	3.17026	0.0529282	4.31275	0.439855	0.244192	0.00408001
PI 535948	W-269	0.912109	0.00441919	12.4096	0.100853	2.28019	0.0154377	0.809478	0.00648048	8.89367	0.0849588	30.9264	0.318693	12.2925	0.0529952	0.665561	0.000450323	1.23062	0.00225219	2.60861	0.0199397	4.90053	0.0403825	0.883099	0.0136871	0.730442	0.00339163	0.449122	0.00319013	0.353844	0.00418251	1.88114	0.00934416	1.33837	0.0142727	0.720693	0.00623597	1.41471	0.00730174	0.360038	0.00264643	0.613608	0.00784437	4.0555	0.0305102	5.26981	0.362647	0.602221	0.0169587
PI 534598	W-270	0.981311	0.00359511	15.0186	0.163713	1.53888	0.0085872	0.474951	0.000980574	4.56625	0.0189025	27.1634	0.0587608	13.5579	0.0763959	0.309035	0.000702644	0.708306	0.00217755	2.98101	0.0131465	9.25456	0.0556761	3.91578	0.0226568	0.623417	0.0073187	0.34838	0.00272361	0.437288	0.00212381	1.58651	0.00587339	1.0391	0.00346835	0.660374	0.00121364	0.964772	0.00143372	0.280602	0.00117484	0.590656	0.00669081	2.32627	0.0197308	7.05966	0.254156	0.573359	0.00868805
PI 526231	W-271	1.12862	0.00965716	12.321	0.169663	2.37297	0.0202754	0.543809	0.00233198	3.01766	0.010067	26.9037	0.162623	19.4896	0.0836081	0.414681	0.000476495	1.48885	0.00652708	3.22981	0.0124451	8.14138	0.0579288	2.08609	0.00350468	0.984938	0.00878792	0.386358	0.00144188	0.347732	0.000833824	2.09062	0.00493958	1.5349	0.0156366	0.488785	0.00265517	1.64315	0.00965353	0.606312	0.00811089	0.785691	0.0126562	2.61033	0.00850704	3.46025	0.207736	0.582231	0.0152727
PI 487476	W-272	1.16703	0.00657951	12.2047	0.101362	2.31132	0.00240989	0.477929	0.00123554	4.73914	0.018285	31.1502	0.101354	12.439	0.0627571	0.428419	0.0012705	1.5753	0.00367729	2.96738	0.00811885	8.60561	0.0362899	2.23926	0.0130716	1.27687	0.00591651	0.270149	0.000845796	0.36831	0.00124135	2.17432	0.00661613	1.14795	0.00339306	0.857403	0.00156184	1.38542	0.00546539	0.451894	0.00453162	0.750635	0.00815346	1.8602	0.0107403	4.56634	0.106039	0.526271	0.00514644
PI 105445	W-273	1.43551	0.00940783	14.2126	0.147876	2.47262	0.00675863	0.344982	0.00626911	2.4573	0.00946368	12.0254	0.0525465	4.09804	0.0104032	1.67346	0.00482575	2.08567	0.00303622	5.21406	0.0472414	15.3363	0.0419771	11.8228	0.0805292	2.6321	0.0220577	0.638612	0.00187572	0.108629	5.83691e-05	4.10191	0.0182247	1.69174	0.0157372	0.612344	0.000893257	3.32099	0.00699063	1.51888	0.00376493	1.62915	0.000711752	2.28456	0.00917058	3.36826	0.0534124	0.0618278	0.000137116
PI 113326	W-274	0.925596	0.0080567	11.9023	0.230674	2.80739	0.0109326	0.755343	0.00199533	3.38681	0.0119605	42.5703	0.0510493	12.945	0.0290091	0.215177	0.00158637	1.1797	0.0067256	2.52036	0.0109681	3.27826	0.0106623	1.57577	0.0188575	0.707025	0.00178525	0.238535	0.000945436	0.220373	0.000768531	1.23522	0.00256347	1.32142	0.00897125	0.430566	0.000290983	1.17753	0.00203022	0.422764	0.00475658	0.589048	0.00292306	2.73128	0.0074453	2.39514	0.094044	0.368685	0.000672442
PI 508444	W-275	1.09454	0.193322	13.163	0.0812895	2.71173	0.00931199	0.261432	0.00171132	4.26517	0.0300397	32.6273	0.19412	8.39125	0.0610387	0.284834	0.00179062	1.62192	0.00841432	3.3085	0.0304261	10.4673	0.0340466	2.67206	0.00392023	1.22025	0.0158799	0.30272	0.00229105	0.280072	0.00211965	1.65437	0.00289804	1.42177	0.00569269	0.569154	0.00161967	1.65128	0.00757069	0.834806	0.004823	1.07741	0.00288029	2.7859	0.00956422	3.28671	0.218157	0.556252	0.00374821
PI 161373	W-276	1.23226	0.00379312	11.7963	0.217212	3.0139	0.00430873	0.238983	0.00204826	3.85397	0.00713855	33.693	0.283026	6.22768	0.0178374	0.647094	0.00396426	1.92586	0.00343751	3.77219	0.0271957	9.68495	0.0375207	2.29313	0.0115063	1.31354	0.0199939	0.33162	0.000364757	0.157667	0.00035775	1.55785	0.00678836	1.73236	0.0114173	0.684216	0.00336104	2.15298	0.0126749	0.907598	0.00693631	1.30895	0.00809463	4.50394	0.01082	2.19802	0.134846	0.295777	0.00351851
PI 508446	W-277	1.48925	0.0111898	17.1832	0.249697	2.91745	0.0122862	0.342418	0.000222083	2.55686	0.0358794	37.5719	0.167571	6.54102	0.0348622	0.449895	0.010927	1.08382	0.00762404	3.28399	0.0224607	8.11136	0.0394444	2.11579	0.0055184	0.676749	0.0045394	0.47924	0.000581513	0.27318	0.00270184	1.49914	0.0105698	1.45258	0.0137752	0.468218	0.00376176	1.04691	0.00670353	0.412776	0.00338781	0.478418	0.00488342	3.04179	0.0207112	2.57732	0.0330383	0.528928	0.00351071
PI 512332	W-278	1.31845	0.00856155	34.2736	0.240248	2.72835	0.0108546	0.28756	0.00135131	2.38837	0.0123663	25.5055	0.0663011	6.39709	0.0165948	0.764716	0.00518677	1.02348	0.00916988	2.21267	0.0323962	4.65333	0.019271	3.26977	0.0265069	0.838277	0.00446672	0.410543	0.000729835	0.163827	0.000300798	1.49177	0.00470479	1.42453	0.00794404	0.463444	0.00083958	0.998624	0.00303943	0.366991	0.00173263	0.550249	0.00325592	1.64249	0.00587363	3.23041	0.0960919	0.308657	0.00288376
PI 163202	W-279	1.08998	0.00767055	11.11	0.100622	3.98	0.0301785	0.417792	0.0033894	3.60672	0.00736118	33.8347	0.198697	12.5985	0.0289618	0.447574	0.000884158	1.54422	0.00483738	3.23694	0.013735	7.34282	0.0301266	2.41985	0.0220097	1.07794	0.00383755	0.295787	0.00237282	0.139037	0.000801279	2.02738	0.0119325	1.47244	0.0081002	0.575927	0.00260824	1.75945	0.00468636	0.68558	0.00252692	0.952419	0.00424952	2.47197	0.0201173	3.72992	0.209327	0.240153	0.00191447
PI 163203	W-280	1.07671	0.0158077	12.4471	0.178258	4.05238	0.0334281	0.410535	0.00157277	3.85077	0.0251553	33.2487	0.254543	9.76073	0.0178369	0.586669	0.00532404	1.55902	0.00392786	3.54105	0.0305498	9.68772	0.0556666	2.61611	0.0305509	0.911158	0.00579387	0.330484	0.00114059	0.216251	0.000738508	2.12318	0.0122033	1.24033	0.0237257	0.603679	0.00448031	1.54311	0.0055912	0.476458	0.00664894	0.692266	0.00809832	2.17212	0.0143096	3.6958	0.228995	0.377109	0.00450523
PI 532813	W-281	1.53426	0.0207848	18.4602	0.197252	2.90101	0.00461138	0.349001	0.00409025	3.46046	0.0430482	29.3571	0.159956	6.05033	0.0189183	0.471894	0.00119285	1.4245	0.00274308	3.41789	0.0341313	10.2845	0.122097	1.99127	0.0140442	1.31362	0.00557559	0.376593	0.00293722	0.2844	0.00180635	1.76666	0.00234865	1.56376	0.00578377	0.891989	0.00506939	1.33127	0.00249176	0.447144	0.000987137	0.651343	0.00441421	3.55553	0.0241686	3.3795	0.166936	0.579141	0.00403017
PI 534530	W-282	1.09463	0.00500035	13.9832	0.0702576	2.21295	0.00553768	1.13996	0.00162147	5.97921	0.0271972	33.2203	0.0576209	15.9613	0.0954313	0.816214	0.00333756	1.00195	0.00522073	3.22843	0.046002	5.05699	0.0386343	0.906204	0.00223021	0.759972	0.00290226	0.452243	0.00217308	0.26238	0.000579044	1.65284	0.00644759	1.26266	0.00255373	0.626358	0.000538869	1.03957	0.00222345	0.415147	0.0016788	0.618088	0.00388442	2.80749	0.0134064	1.74695	0.0346488	0.533241	0.000714015
PI 534534	W-283	1.06236	0.00719809	16.0514	0.0790774	2.11343	0.00399674	0.47895	0.00468185	4.50642	0.00222528	24.5122	0.0584142	8.41375	0.0350308	0.376882	0.00275006	1.915	0.0119262	3.68645	0.0184202	9.28896	0.039161	6.12309	0.0133096	4.33	0.0233619	0.268213	0.0018943	0.148837	0.000325723	2.23447	0.0120437	1.36198	0.00502864	0.618848	0.0028634	1.86505	0.0133727	0.700655	0.00400439	1.15335	0.00253168	1.86307	0.0135159	3.59887	0.0823056	0.240052	0.00073117
PI 534586	W-284	1.09727	0.0077593	12.2603	0.299519	1.79846	0.00793389	0.410009	0.00593625	3.71412	0.0508146	35.7237	0.353358	11.2299	0.113035	0.379656	0.00426207	1.32498	0.00634546	4.2847	0.0897594	6.36783	0.0978076	2.18384	0.012405	0.826452	0.00736159	0.474692	0.00511784	0.368338	0.00448136	1.87827	0.0136864	1.06157	0.00833164	0.873208	0.0051314	1.0279	0.00418259	0.445373	0.00258903	0.637041	0.00314578	2.44491	0.0350103	4.83099	0.410609	0.772634	0.0127881
PI 534590	W-285	1.09343	0.00664262	11.2194	0.0911876	3.53895	0.0179743	0.423879	0.00382916	6.14586	0.037287	30.1458	0.135542	9.43617	0.015649	0.461115	9.8624e-05	1.74205	0.00517345	3.68914	0.026532	9.85586	0.0600658	2.63547	0.00748141	1.38397	0.00511175	0.27257	0.00263994	0.129057	0.000590673	1.77268	0.0107702	1.69726	0.0124486	0.610409	0.00241107	1.86564	0.00228442	0.893536	0.00449835	1.39036	0.00449942	2.588	0.00630233	2.89903	0.142981	0.219312	0.000644769
PI 536446	W-286	1.57968	0.0169282	14.8988	0.029622	4.48718	0.0089436	0.860871	0.00324392	5.78262	0.0390963	27.3256	0.0779293	8.62016	0.0418422	1.32343	0.00410119	1.38708	0.00382874	4.12984	0.0145173	9.68885	0.0839851	1.84221	0.00439458	1.13674	0.00750666	0.458773	0.00470638	0.191754	0.00101264	2.35187	0.00890518	1.69389	0.00592912	0.512493	0.00169698	2.39098	0.00827338	0.749062	0.00172877	0.92984	0.0119498	2.59229	0.00804871	2.47667	0.0834913	0.333254	0.000653774
PI 536451	W-287	1.95735	0.00530451	10.6525	0.0419996	2.11948	0.00930191	0.366703	0.00563448	5.43417	0.0214414	22.1951	0.159208	5.15685	0.0049962	0.384889	0.00121092	1.77496	0.00877783	5.77385	0.00730075	16.2388	0.0654906	5.97722	0.0529354	0.745008	0.00482607	0.386621	0.00167013	0.191232	0.000283397	2.10545	0.0117403	1.53175	0.0143893	0.796277	0.00586609	2.39386	0.00976568	0.819662	0.00730995	1.35023	0.00739588	4.29648	0.0169862	4.17186	0.163999	0.333096	0.00203352
PI 536453	W-288	1.50473	0.0175883	14.0077	0.0461766	1.66955	0.00727139	0.865111	0.00427387	5.74331	0.0353731	19.366	0.063898	4.39451	0.017265	0.416228	0.00256842	2.22835	0.00414716	4.17752	0.0123716	8.10739	0.0547343	10.1817	0.0646407	7.11132	0.0247054	0.310593	0.00104096	0.152006	0.00043249	2.11302	0.0134424	1.64284	0.011588	0.55012	0.000843526	2.5587	0.0153274	1.1362	0.00296839	1.50317	0.00415115	2.53911	0.0157001	3.51158	0.127244	0.248042	0.00261654
PI 537265	W-289	0.954572	0.0140627	19.9902	0.161017	2.99651	0.0125228	0.437952	0.000736884	7.16455	0.0238771	30.0959	0.145263	9.82162	0.0155262	2.33524	0.0275743	1.22885	0.00195853	2.90557	0.00957357	4.72703	0.0252005	0.631449	0.00171728	0.749424	0.0096826	0.904248	0.00392401	0.231937	0.00125719	1.82563	0.0120892	1.17727	0.0115956	0.496598	0.00228724	1.28795	0.00478218	0.447835	0.000151011	0.721953	0.00735267	3.11291	0.00980167	3.19731	0.114898	0.487825	0.00622491
PI 537299	W-290	1.02721	0.00531409	11.9741	0.110359	3.17937	0.00925141	0.425617	0.00295987	3.93646	0.0208998	38.3446	0.297391	11.3205	0.078016	0.427038	0.00137092	1.13808	0.00718543	3.79044	0.0384879	5.11728	0.0159219	1.39618	0.00504256	0.906193	0.00541351	0.449596	0.00409397	0.305802	0.00264244	1.7147	0.00860562	1.18771	0.0174068	0.687779	0.00177204	1.19635	0.0112125	0.383762	0.00115293	0.503382	0.00630022	4.07336	0.028637	2.87586	0.223338	0.548329	0.0103341
PI 593389	W-291	1.36047	0.00595974	22.8746	0.167003	3.33286	0.0175604	0.323687	0.00148079	5.46434	0.00471478	22.2409	0.0377767	4.05951	0.00808942	0.408191	0.000405978	1.58144	0.00711477	4.18065	0.0301823	13.992	0.11614	2.47706	0.0460732	0.867517	0.00607335	0.393613	0.00289942	0.236426	0.000551353	1.80477	0.00467566	1.88904	0.00498063	0.88357	0.000978772	1.47537	0.00196785	0.574683	0.00238623	0.837745	0.0030601	2.26082	0.0209497	2.38315	0.049898	0.440309	0.00175324
Grif 1729	W-292	1.82756	0.00800063	19.3405	0.196252	2.33964	0.0232778	0.490185	0.00292849	1.71731	0.0164146	34.9288	0.134131	4.28992	0.0058357	0.462845	0.00310078	0.790203	0.0048609	3.14315	0.0542797	10.0943	0.0832315	2.03633	0.0153141	0.657959	0.00595953	0.309047	0.00126775	0.314865	0.0013016	1.01814	0.00769019	1.9494	0.0186998	0.631177	0.00214948	0.719548	0.00174185	0.297408	0.000589869	0.35555	0.00260531	4.39597	0.0111455	3.57218	0.0823623	0.602683	0.00114285
PI 164708	W-293	1.66225	0.174874	18.9944	0.195681	3.2466	0.00546722	0.27097	0.000528547	3.32859	0.0186152	27.3868	0.116048	5.98321	0.0382684	0.569046	0.00273445	1.38554	0.00490263	4.04824	0.00745774	12.3932	0.0270527	2.00669	0.0111476	1.21961	0.013068	0.268252	0.00100458	0.235932	0.00113293	1.65741	0.00897543	1.81565	0.00681664	0.817355	0.00279298	1.50477	0.00910743	0.671489	0.00379954	0.89824	0.0125357	3.84117	0.0315456	2.32661	0.0402478	0.450444	0.00206491
PI 164737	W-294	1.39785	0.0184606	19.0372	0.215549	3.73706	0.0316817	0.315139	0.00162653	4.78787	0.0217857	26.5875	0.119011	8.16809	0.0330506	1.65662	0.00763222	1.77517	0.00607055	3.61295	0.0290815	10.309	0.0603411	3.07249	0.00764099	0.799834	0.0019713	0.49681	0.00152715	0.255767	0.000512633	1.18929	0.00312125	1.34772	0.0133357	0.458102	0.00171099	1.52628	0.00239691	0.565208	0.00287365	0.654724	0.00534288	2.5774	0.0125245	2.28226	0.051447	0.455248	0.00132199
PI 164977	W-295	1.6851	0.0119528	16.2597	0.0866121	2.2996	0.0101335	0.619832	0.00230786	5.5033	0.0159676	30.3867	0.228065	10.717	0.0480196	0.873618	0.00186053	1.89842	0.0117234	4.0233	0.0278975	4.51645	0.0145924	1.40982	0.00441876	1.35043	0.00438185	0.540999	0.00264843	0.287216	0.00188263	1.82308	0.00339125	1.8933	0.00487257	0.634748	0.00244315	1.81974	0.0122982	0.729069	0.0027376	0.986026	0.0109482	2.60659	0.00652083	2.09182	0.14131	0.526253	0.00436609
PI 165024	W-296	1.75645	0.0100585	13.9122	0.149916	2.69336	0.00321913	0.340463	0.000452945	5.94671	0.0294496	26.686	0.141591	5.75337	0.0216919	0.399853	0.000474861	1.48578	0.016774	5.28977	0.0264685	15.1726	0.0549287	2.00546	0.00451277	0.943192	0.00508893	0.295699	0.00217709	0.20651	0.000717611	1.49707	0.0028665	1.83411	0.0140956	0.746891	0.0045795	1.33227	0.00910237	0.439692	0.00363169	0.698305	0.00535315	2.81592	0.0223297	2.70397	0.149452	0.393268	0.00440984
PI 169251	W-297	0.959942	0.00178636	18.5569	0.102861	3.60544	0.00927279	0.350949	0.00115025	2.80363	0.0294236	36.4923	0.266807	7.94556	0.00384513	0.762709	0.00522248	1.63202	0.0081272	3.25825	0.0314857	6.13455	0.0329898	3.25953	0.0113532	0.793949	0.00750403	0.324641	0.000441339	0.197359	0.000756661	1.50612	0.000831618	1.24606	0.00770386	0.505867	0.00276722	1.09767	0.010274	0.49813	0.00298885	0.726204	0.0101279	1.44361	0.00656347	2.18127	0.132432	0.317231	0.00167409
PI 169253	W-298	1.45184	0.0224782	15.2964	0.161121	3.12961	0.0240224	0.968888	0.00466583	4.28068	0.0336894	27.7428	0.214567	10.3205	0.0192665	0.932094	0.00187449	1.85978	0.00617426	3.38952	0.0546943	8.80542	0.102381	1.05023	0.13869	1.29609	0.0174608	0.337642	0.00154761	0.136684	0.000290944	1.8937	0.00473146	1.98101	0.00706436	0.656149	0.00498558	2.4541	0.00120127	0.805392	0.00642868	1.19912	0.0129924	2.35335	0.00505661	4.34506	0.262395	0.245356	0.00142423
Grif 1730	W-299	2.134	0.0188553	19.2584	0.0515514	3.0238	0.00653112	0.547968	0.000517	5.7423	0.0146768	13.8233	0.0311938	4.14693	0.0156716	4.16649	0.0293365	2.11412	0.00897863	4.28214	0.00590469	13.2972	0.0344117	6.93508	0.0504852	1.63466	0.00688798	0.750953	0.00350199	0.0693148	0.000230427	1.68727	0.0059721	2.08304	0.0123308	0.645871	0.00144392	2.8022	0.0113201	1.2376	0.00801488	1.94206	0.00716838	1.87355	0.0102353	2.76886	0.0283534	0.101963	0.000975671
PI 172793	W-300	1.80183	0.00856991	14.6334	0.0760449	2.83512	0.0168288	0.661553	0.00366815	3.9253	0.0373874	30.9004	0.326129	12.6606	0.109651	0.59633	0.00485388	0.891222	0.00533071	3.47966	0.0147037	5.55593	0.0172634	1.22298	0.00665653	0.911231	0.00888385	0.432796	0.00229914	0.27257	0.00154877	2.10043	0.00887847	1.71288	0.0128987	0.71168	0.00242648	1.57723	0.00341133	0.680855	0.00564035	0.811708	0.0153941	4.16906	0.0300982	3.56834	0.297295	0.526955	0.00818373
PI 172799	W-301	1.31419	0.0168154	22.0156	0.075185	2.83385	0.017447	0.544643	0.00124502	3.63083	0.0076785	15.7085	0.0773058	4.86864	0.00758549	0.427904	0.00218528	1.20094	0.00711119	3.19089	0.0150306	13.6855	0.0644046	6.41926	0.0436389	1.79183	0.0087277	0.892553	0.00212129	0.0804204	0.000287851	2.96904	0.00646217	1.71422	0.00300577	0.477199	0.00132964	2.73498	0.0241702	1.20889	0.00850131	1.54991	0.00529204	3.28768	0.00479488	4.28567	0.0813804	0.154424	0.000554813
PI 179233	W-302	1.74733	0.00699441	22.5364	0.450778	3.26849	0.0239662	0.424448	0.00148765	4.62413	0.0215561	18.5215	0.0451486	6.87971	0.0281598	0.888451	0.00783233	2.27943	0.0142048	3.47493	0.0518128	10.2713	0.0108312	5.63079	0.068745	1.69304	0.00907354	0.291585	0.00155668	0.142464	7.22115e-05	2.52877	0.0105966	1.73147	0.0219639	0.66727	0.00946477	1.81044	0.016158	0.778626	0.00842218	1.1319	0.00790417	2.20211	0.0181506	3.23106	0.264373	0.230145	0.00196038
PI 181740	W-303	1.37899	0.0126509	15.6146	0.0702546	3.33324	0.0181359	0.348304	0.00150134	4.73376	0.00889417	29.4944	0.179617	8.06802	0.047751	0.350777	0.00194232	1.46264	0.00895616	4.4387	0.0440654	10.8363	0.100077	2.15367	0.0156426	0.836743	0.00441285	0.312725	0.00122536	0.216656	0.0014937	1.754	0.00246009	1.59756	0.00924361	0.50103	0.00163903	1.41403	0.00674144	0.478068	0.0013655	0.701799	0.00236822	2.29337	0.0113128	3.10341	0.201712	0.366465	0.00235923
Grif 1731	W-304	1.32644	0.0297806	10.8841	0.0952664	1.8132	0.0099261	0.436582	0.00327626	5.02098	0.00665684	11.0111	0.0308941	3.98025	0.0248218	0.133554	0.00140926	2.12564	0.00668482	6.03809	0.0381196	12.7667	0.0808067	8.42093	0.0935053	15.8092	0.0836485	0.206734	0.00148122	0.132582	0.000847727	2.48789	0.00902067	2.05216	0.00986701	0.375672	0.00265606	3.23663	0.0105583	1.39045	0.00847383	1.943	0.0211738	1.71663	0.0216653	3.00397	0.206486	0.224622	0.00310631
PI 211849	W-305	1.9717	0.0300501	21.3226	0.573636	1.97722	0.019135	0.710857	0.00810837	1.68266	0.0211553	32.4931	0.510671	9.01762	0.0894671	0.445926	0.00327059	0.797686	0.00344992	2.70473	0.0221724	5.52988	0.0429548	2.64246	0.0253316	0.680544	0.0111109	0.332166	0.00470922	0.35091	0.0043548	1.09892	0.0117131	1.8374	0.0156427	0.693032	0.0065244	0.805732	0.00462459	0.351823	0.00253638	0.387766	0.00518702	4.28159	0.0350531	2.85903	0.16267	0.651213	0.00307132
PI 211851	W-306	1.05635	0.00477295	13.9765	0.150633	3.28001	0.0107877	0.390966	0.00229545	3.6593	0.010474	32.2181	0.2579	9.60461	0.0384696	0.724384	0.00705739	1.29123	0.0118189	3.55962	0.0501547	7.48044	0.0693054	2.71362	0.0158442	1.26152	0.00173599	0.324375	0.00123282	0.180771	0.000582779	2.02441	0.00632261	1.24829	0.0213957	0.536238	0.00278391	1.52681	0.0101392	0.478053	0.00325551	0.688702	0.0144484	4.42525	0.0103984	4.48143	0.332715	0.307881	0.00270434
PI 212287	W-307	1.21515	0.00990425	19.1681	0.0921384	2.40787	0.0140053	0.267583	0.00145957	2.57094	0.0112015	6.3358	0.0073564	3.05939	0.0231586	0.77119	0.0109553	1.93976	0.0072661	5.1401	0.0298335	18.209	0.102172	13.4514	0.138907	7.39561	0.0071058	0.418677	0.000386846	0.0866382	0.000136271	1.81503	0.00832136	1.56633	0.0132823	0.589736	0.00324066	2.67957	0.0075256	0.944275	0.00663331	1.44376	0.016858	1.80692	0.0168872	3.17107	0.0780231	0.11313	0.000869832
Grif 5595	W-308	1.09768	0.0107822	17.3875	0.150145	5.89312	0.0381261	2.1041	0.00893307	1.72313	0.0108342	28.1551	0.146092	9.42077	0.0272997	1.2528	0.0100966	1.00226	0.00935311	4.33082	0.0526146	8.26347	0.0382316	1.67344	0.0330276	0.405952	0.00164923	0.487196	0.00339639	0.14914	0.000799804	1.29579	0.00610645	1.71545	0.0105012	0.365674	0.00261774	1.88583	0.0168797	0.484949	0.00251618	0.706498	0.00781293	3.60275	0.0154637	2.65517	0.179624	0.297964	0.00409867
Grif 5596	W-309	1.13213	0.00369201	15.5208	0.124261	3.77398	0.0113105	0.403882	0.00575588	5.85561	0.0348072	27.3698	0.169937	7.74765	0.0100545	0.811435	0.00332074	1.78633	0.00391975	3.92604	0.0359103	10.9133	0.0984787	1.53853	0.0149836	1.05842	0.00754772	0.367209	0.000427067	0.192924	0.00124273	1.6375	0.00618418	1.58775	0.00766636	0.613632	0.00183019	1.72262	0.0078759	0.694726	0.00301388	1.10179	0.000791915	2.79227	0.0123769	2.37268	0.182648	0.35386	0.00306496
PI 222775	W-310	1.08257	0.0138607	15.2016	0.0955312	4.35661	0.0336312	0.53286	0.0107248	4.22598	0.0346683	29.7302	0.0889975	13.5628	0.118311	0.306391	0.00301525	1.34095	0.00117601	3.24729	0.0195057	7.88448	0.0612491	1.79139	0.0176549	1.04299	0.00987539	0.378337	0.00312039	0.191972	0.000969024	1.80822	0.0128766	1.41363	0.010123	0.578883	0.00423379	1.49707	0.00929528	0.861326	0.0107247	1.26243	0.0244473	2.37268	0.0432558	2.19379	0.0229675	0.329435	0.000829416
PI 222778	W-311	1.28164	0.0103102	17.2184	0.0558154	2.72851	0.0079142	0.35613	0.000721957	3.10202	0.012278	31.1457	0.134301	8.42579	0.0457085	0.367736	0.00131714	1.46079	0.00573228	3.0323	0.0357489	5.23113	0.00655417	1.67476	0.00598918	0.954358	0.00683157	0.314887	0.00298275	0.210048	0.00143509	2.17692	0.00609631	1.94123	0.0091847	0.829107	0.00230266	1.47565	0.00201914	0.501052	0.00240519	0.723338	0.00541196	7.29579	0.0391142	1.8505	0.0282852	0.399736	0.00180185
PI 226459	W-312	1.38314	0.0156198	17.4674	0.335327	3.98379	0.015004	0.538947	0.00212671	4.25477	0.0296359	28.1516	0.0544212	5.65535	0.0150328	1.57315	0.00605431	1.53997	0.0123315	4.0517	0.0189953	11.8103	0.0193754	2.34618	0.00660879	1.19532	0.0116249	0.415537	0.000471401	0.15698	0.000444884	1.87521	0.0126986	1.73379	0.0115274	0.866624	0.0042786	1.73775	0.0130731	0.630313	0.00178944	1.00134	0.00840672	2.29194	0.00793197	2.59455	0.154078	0.278529	0.00185403
PI 227202	W-313	2.01822	0.203429	7.36848	0.278994	1.75517	0.0329832	1.13873	0.0518865	2.23176	0.0506945	37.8347	0.332546	4.9908	0.0634804	1.19425	0.0532304	0.780298	0.00302094	2.75678	0.00289592	8.7265	0.0661868	7.83017	0.111866	1.51734	0.0389834	1.30668	0.068407	1.13357	0.062637	1.33479	0.0344533	1.13642	0.00342986	0.8484	0.0359836	0	0	0.471586	0.00870331	0.465327	0.00896369	1.704	0.0520918	3.14501	0.225768	1.76433	0.0947977
PI 270307	W-314	1.15036	0.0127031	11.724	0.217364	2.48623	0.00470736	0.372606	0.00191367	5.96927	0.0519675	27.586	0.0496157	11.4383	0.0208186	1.45919	0.00296038	2.20773	0.00902587	3.75848	0.0218096	14.1455	0.137397	2.50414	0.0152592	0.90264	0.00385134	0.417852	0.0017676	0.251723	0.00120076	0.92467	0.00153965	1.14202	0.00923707	0.530683	0.00187699	1.40509	0.00687811	0.502323	0.00320137	0.706198	0.00910733	2.64244	0.015821	2.85487	0.0258722	0.401346	0.0110444
PI 319236	W-315	1.52484	0.00495487	21.2117	0.378877	3.54338	0.0065564	0.458256	0.00164513	2.68421	0.0212828	30.6147	0.109275	4.83908	0.0125019	0.590731	0.00304064	1.58044	0.00739176	2.95713	0.0162924	6.20054	0.0280249	2.11308	0.00426189	0.682663	0.00215466	0.262976	0.000947243	0.194145	0.000850166	1.66625	0.00454195	2.43864	0.0163554	0.659891	0.00163868	1.79155	0.00664961	0.690151	0.00399397	0.988293	0.0039289	4.8377	0.0250427	1.96704	0.112649	0.329365	0.00256718
Grif 5599	W-316	1.67599	0.0186803	12.2596	0.239601	2.04048	0.00790766	0.240512	0.0007273	5.24908	0.0557928	27.5914	0.146506	2.74817	0.00479637	0.417993	0.00210259	2.27688	0.0057763	4.17799	0.0608744	13.2967	0.183239	5.13651	0.0853273	2.52789	0.0162777	0.310604	0.00312473	0.220812	0.000895141	2.15494	0.00344252	2.10576	0.0104996	0.750145	0.000454897	2.59241	0.00596276	1.24779	0.0127182	1.69385	0.0116197	2.88339	0.0148682	3.13974	0.172067	0.342722	0.0015585
Grif 12336	W-317	1.29287	0.0132493	13.0112	0.0388932	2.41168	0.0137184	0.512639	0.00435014	6.81216	0.0145095	26.2441	0.0863586	16.9688	0.0809708	0.459456	0.00226997	1.80235	0.00570675	3.15854	0.0185471	7.03064	0.05072	1.15968	0.00246897	0.939624	0.00243184	0.357825	0.00153016	0.261068	0.00185645	2.15975	0.00060769	1.91683	0.0127082	0.603254	0.00120623	1.7682	0.008686	0.649777	0.00274115	0.900308	0.00600412	2.876	0.0152219	3.36392	0.14416	0.49113	0.00189271
PI 426625	W-318	1.54816	0.011358	14.2745	0.0803838	5.01832	0.0215118	0.294737	0.000401914	5.82408	0.0403619	20.7618	0.118019	5.6384	0.00961031	1.11919	0.00705097	1.62209	0.0120848	5.09471	0.0467988	14.962	0.0192482	5.53603	0.0394932	0.887218	0.00703145	0.416663	0.000998017	0.129076	0.000544656	1.87355	0.00847208	1.92709	0.00794302	0.639012	0.00193425	2.46769	0.0069756	0.786251	0.00101505	1.07855	0.0105906	2.04128	0.0162013	2.8871	0.0976976	0.216528	0.000826287
PI 435990	W-319	1.26028	0.017936	13.3149	0.165976	2.93443	0.00839735	0.380869	0.00273295	5.9325	0.0506585	29.1748	0.170996	8.70489	0.0511662	0.708364	0.00916598	2.02979	0.00659857	3.66083	0.038324	8.48032	0.0702523	2.04932	0.0219219	1.70987	0.0132283	0.397634	0.00396147	0.17673	0.000205977	2.45552	0.00834651	1.70021	0.0197277	0.657245	0.00360545	2.18523	0.0108725	0.900244	0.00423927	1.15388	0.0146343	2.17818	0.012025	2.52724	0.171384	0.342164	0.00553525
PI 470246	W-320	1.15685	0.00350069	40.5785	0.100236	2.60688	0.0231612	0.594198	0.00264578	1.69394	0.00491319	18.1923	0.00950627	6.9923	0.0503876	7.80583	0.0178778	0.938182	0.0058855	1.88669	0.00978904	4.35541	0.0243027	2.69802	0.00300482	0.609977	0.0024639	0.84549	0.00338936	0.0648582	4.50757e-05	1.42007	0.00439706	1.15942	0.0110417	0.578079	0.00185743	0.867432	0.00262715	0.351711	0.00111454	0.546924	0.00199121	1.19336	0.00555002	0.942257	0.00662341	0.123895	0.00063896
Grif 14199	W-321	0.97099	0.189834	16.1275	0.34835	2.28082	0.0147296	0.702953	0.00087186	2.28567	0.0115036	32.0353	0.067813	8.35353	0.0522858	0.46453	0.00403202	1.26478	0.00530942	2.68916	0.0343819	5.12905	0.0323186	1.4459	0.0125629	1.0761	0.00693745	0.345566	0.00177772	0.237789	0.00156058	1.67916	0.0077812	1.76385	0.0181076	0.558025	0.00199122	1.6093	0.00974105	0.742573	0.00448905	0.785161	0.00535489	7.47451	0.0614219	2.26743	0.0166363	0.4417	0.00271209
PI 164539	W-322	1.29445	0.00956894	25.1038	0.254396	6.44638	0.0202135	3.07711	0.0171707	0.791763	0.00321864	21.4718	0.0891849	6.31041	0.0616664	1.35359	0.0144433	0.67985	0.00488368	4.30929	0.0568596	7.2868	0.0397505	5.74578	0.0517232	0.64893	0.00159868	0.61488	0.00171545	0.142834	0.000722717	1.16111	0.0115233	1.52206	0.0162615	0.47435	0.00139919	1.30221	0.010651	0.433654	0.00385024	0.515457	0.00237377	1.60779	0.0103155	3.05993	0.192721	0.274953	0.00369172
PI 381696	W-323	1.36329	0.000303746	18.4427	0.242106	2.82251	0.0137158	0.569221	0.000614748	3.61375	0.0165481	24.6978	0.20529	11.0247	0.014781	0.488555	0.000986544	1.86894	0.0058422	3.72246	0.0328272	7.29512	0.0217523	2.15222	0.0158676	1.04851	0.00928435	0.395294	0.00234912	0.273033	0.00176349	1.98003	0.0163007	1.72938	0.012008	0.624694	0.00177214	1.66039	0.0113805	0.753006	0.00166428	1.0719	0.0023062	5.46565	0.0311954	2.71525	0.0764377	0.489059	0.000833559
PI 212289	W-324	1.20323	0.00838507	19.6582	0.239771	3.6759	0.0281751	0.742832	0.00362313	7.64891	0.0305882	29.1998	0.189743	11.9544	0.0326661	0.903824	0.00667806	1.09914	0.0125898	2.98988	0.0183904	4.24867	0.013965	0.584432	0.0110549	0.872359	0.00461738	0.537626	0.00205441	0.273365	0.00107512	1.47526	0.0061289	1.46017	0.0067616	0.722806	0.00333064	1.38969	0.00694434	0.442156	0.00385104	0.622162	0.00310119	3.00412	0.0204911	2.22935	0.0804314	0.475224	0.0133702
PI 536453	W-325	1.04144	0.00419808	21.1565	0.10076	2.01684	0.0112801	0.516798	0.00492371	7.48877	0.02141	28.3235	0.0861022	8.23968	0.0205836	2.24233	0.0115898	0.985252	0.00999961	3.86562	0.028245	5.93204	0.0249338	1.29757	0.00252772	0.689656	0.00263538	0.866565	0.00272369	0.270042	0.00026269	1.78551	0.00707634	1.09966	0.0127785	0.706865	0.00290602	1.09004	0.00847461	0.51351	0.000802449	0.650437	0.0107911	2.15831	0.01741	4.24879	0.0392825	0.558559	0.00407629
PI 212289	W-326	1.01892	0.00546494	13.4373	0.200897	2.44935	0.00372549	1.03848	0.00528424	2.5353	0.0271736	43.1305	0.203814	11.5974	0.0270915	0.742278	0.00431512	0.845241	0.00228342	3.92523	0.038827	3.66433	0.0132058	1.18545	0.00805445	0.624356	0.0038227	0.433472	0.00185338	0.291132	0.00124679	1.4189	0.00365285	1.16314	0.00762299	0.608261	0.00152749	1.10446	0.00764754	0.451167	0.00106553	0.510965	0.0089005	2.2631	0.00890273	1.9485	0.0223254	0.498619	0.00312788
PI 536449	W-327	1.56767	0.00799723	17.232	0.090618	3.91306	0.00395407	0.724754	0.00535829	4.28817	0.152608	23.7402	0.117603	7.12441	0.0346647	0.53423	0.0117694	2.32311	0.0145634	3.06488	0.0844838	15.9128	0.0819586	4.7094	0.0451945	1.28748	0.0200901	0.272805	0.0417172	0.115463	0.000701348	1.5294	0.0103509	1.28979	0.0176415	0.522632	0.0026381	1.94563	0.0167242	0.823975	0.0107109	1.16415	0.0230941	0.985872	0.00885856	2.3683	0.051127	0.187981	0.00214421
PI 534584	W-328	1.67112	0.030868	18.168	0.0756324	2.68374	0.0128252	0.588574	0.000477283	6.24465	0.0629363	25.2487	0.123347	8.20831	0.0191567	0.863383	0.00524235	2.07067	0.00779347	3.63759	0.023379	7.85951	0.0278489	2.13838	0.0101835	1.13495	0.0116609	0.423688	0.00301828	0.175602	0.000499318	2.36991	0.00615292	1.75072	0.0125202	0.600982	0.00209224	2.35021	0.00240239	0.860388	0.000430794	1.15452	0.00156468	2.23329	0.00520992	3.45547	0.132898	0.313927	0.00163754
PI 164146	W-329	1.28423	0.00817115	18.7144	0.237947	3.67302	0.0104762	0.769451	0.00420543	2.87126	0.0164316	30.0276	0.164055	7.09115	0.0378674	0.749337	0.00518278	1.64714	0.0086479	3.65834	0.0262324	8.41129	0.027237	3.38513	0.0169297	1.34614	0.00995604	0.464157	0.00541319	0.246992	0.00025689	1.85776	0.0106812	1.59336	0.00458665	0.43862	0.00046211	1.93617	0.0169778	0.728097	0.00445487	0.87137	0.0163561	2.79216	0.0105599	2.34292	0.0387504	0.39478	0.00373507
PI 169261	W-330	1.31585	0.0108089	14.231	0.078763	2.78709	0.00688883	0.392866	0.0026622	4.90366	0.044974	27.1415	0.141261	9.03598	0.0607646	0.368136	0.00190552	1.5792	0.0079293	3.43304	0.0340033	7.72232	0.0487722	1.51912	0.00506131	0.973959	0.00332686	0.304998	0.00244965	0.199598	0.000838915	1.81836	0.00620195	1.93021	0.0100698	0.683965	0.00168552	1.97992	0.0090287	0.707615	0.00407091	1.04259	0.0083699	7.11544	0.0518285	3.36308	0.102525	0.354428	0.00142457
PI 181868	W-331	1.58537	0.0150707	19.4549	0.234339	2.44265	0.0240003	0.566689	0.00280295	2.48813	0.0147541	22.8413	0.0609222	2.47429	0.000818619	6.1434	0.00862969	1.82445	0.0078363	3.01329	0.0129571	11.6475	0.0239184	10.3319	0.057987	1.77425	0.00605294	0.560113	0.00312781	0.112617	0.000374711	1.16411	0.00568762	1.1235	0.010817	0.521535	0.00401475	1.79589	0.013277	0.583331	0.00344332	0.790942	0.00505292	1.47668	0.00275542	3.05153	0.160124	0.168301	0.00189674
PI 174103	W-332	1.4606	0.025908	24.0689	0.909878	2.34101	0.0102707	0.538753	0.00843178	4.67291	0.081841	30.5534	0.305512	6.24464	0.0275659	2.18022	0.0414986	1.43939	0.037894	2.33322	0.0525509	5.0698	0.11174	0.510908	0.0182919	1.59979	0.0301146	0.576042	0.0125897	0.101558	0.00249585	1.28053	0.0363649	1.83971	0.0748678	0.703692	0.0216231	2.74758	0.0714451	0.805308	0.377707	1.52941	0.0449382	2.18569	0.0607163	3.33907	0.0498774	0.177543	0.00445939
PI 507861	W-333	2.10913	0.0124201	15.6994	0.238688	3.82909	0.0169716	0.500039	0.00445478	5.39878	0.0149423	21.4129	0.0918747	13.6043	0.0638316	0.411381	0.0021365	1.96873	0.0163479	3.45613	0.0211157	8.66982	0.0336584	0.82249	0.0124376	1.35947	0.00823771	0.360792	0.00214319	0.168017	0.000313157	2.46933	0.00772139	2.13796	0.00196172	0.675308	0.00426698	2.25833	0.0120033	1.12459	0.00217478	1.47887	0.0206258	3.09518	0.0126913	2.98201	0.060416	0.310818	0.00190753
PI 507865	W-334	3.68354	0.00760197	19.4307	0.297924	1.93814	0.0230852	0.217019	0.00223795	2.94007	0.0322266	19.464	0.153912	5.27963	0.0512488	0.239334	0.000702569	1.38932	0.00797963	2.91555	0.0134553	11.9835	0.0455177	1.88485	0.0040314	0.810729	0.00444885	0.200657	0.000874413	0.19706	0.000980047	1.37183	0.00440668	1.90799	0.0120336	0.573886	0.00333855	1.22261	0.00419329	0.524938	0.00148809	0.600622	0.0136826	13.4264	0.112016	2.51804	0.0936154	0.352361	0.00240456
PI 507867	W-335	1.66662	0.0136398	18.5792	0.277014	2.4689	0.01678	0.338819	0.000946011	2.58879	0.0151448	27.7223	0.293752	7.95842	0.0419731	0.305122	0.00171736	1.76414	0.0110653	2.96337	0.02011	7.15061	0.0551422	1.70669	0.0108557	1.06232	0.00663128	0.308203	0.00214383	0.238813	0.00147677	1.77015	0.00950725	1.9761	0.0133807	0.70981	0.00404483	1.7463	0.00595574	0.550743	0.243569	0.870146	0.00287784	7.75819	0.0872847	2.10977	0.122546	0.428703	0.00236993
PI 507868	W-336	1.89631	0.00778182	15.3406	0.191388	2.35965	0.0229603	0.445068	0.00357259	4.40875	0.0228548	17.4384	0.0521797	5.3459	0.0537567	0.474454	0.0033845	2.40254	0.00998338	6.72559	0.0560619	9.96177	0.0263933	7.86377	0.0384061	3.09588	0.00929932	0.405279	0.000848501	0.200574	0.000187493	2.56716	0.00675221	2.54231	0.0106635	0.629629	0.00592399	2.55582	0.0128403	0.518785	0.222641	0.708109	0.0254062	3.90662	0.0121164	4.21844	0.191702	0.280801	0.000358773
PI 508441	W-337	1.22808	0.00469552	19.7176	0.102229	2.73783	0.0149047	0.55785	0.00353107	6.86236	0.0321702	32.0499	0.211888	10.0511	0.0117659	0.51429	0.00136613	0.847512	0.00531317	2.06787	0.0187773	5.52997	0.0387294	0.604815	0.00624195	0.726982	0.00676681	0.356892	0.0014231	0.263427	0.00113524	1.56846	0.00224002	1.19926	0.00728111	0.826171	0.0020432	1.00961	0.00558425	0	0	0.590281	0.005309	3.10783	0.0232656	4.94736	0.287898	0.487848	0.0423863
PI 512339	W-338	1.1242	0.213773	23.4963	0.397601	3.24237	0.038856	0.325967	0.00434021	2.0369	0.0243205	29.6052	0.238909	9.02095	0.0495964	0.409083	0.00428691	1.52322	0.0105936	3.71111	0.0392913	7.4552	0.0687573	1.5981	0.23862	0.634529	0.0105121	0.301902	0.00206016	0.175934	0.0012126	1.11594	0.010213	1.6304	0.0152397	0.383857	0.00401472	1.03762	0.0110964	0	0	0.7638	0.0110165	3.91487	0.0245095	0.000165492	0.000165492	0.271567	0.00183535
PI 512343	W-339	1.92225	0.009647	19.2894	0.117208	3.22036	0.0254901	0.26354	0.00114702	4.43034	0.0216354	26.623	0.0586935	7.1381	0.0313009	0.758607	0.00318226	1.96897	0.0100936	3.77602	0.0171695	11.2118	0.0592753	2.64036	0.00520864	1.3368	0.00598691	0.324937	0.00098557	0.208711	0.000790844	1.75086	0.00143189	1.69331	0.0130688	0.818915	0.00129191	1.62901	0.000812219	0	0	0.808827	0.00511198	3.76194	0.0289601	0.201382	0.0053931	0.326989	0.0210857
PI 512346	W-340	6.82028	0.0633581	16.7826	0.299138	2.5038	0.00330979	0.343307	0.00104088	4.91999	0.0317062	19.2268	0.100028	12.0086	0.0400483	0.385187	0.0026045	1.5306	0.00860825	3.33587	0.0117897	9.95041	0.0400736	1.23022	0.00574995	0.880523	0.00989192	0.301847	0.00275233	0.221993	0.000397116	1.65896	0.00202509	1.67173	0.0121888	0.680605	0.00384759	1.47863	0.00233835	0	0	0.828785	0.00860211	6.28236	0.0112512	0.188679	0.0259463	0.381093	0.038364
PI 512353	W-341	1.59283	0.00728654	18.3032	0.0632312	3.79018	0.00537637	0.573249	0.0111846	3.34138	0.0285329	31.1845	0.090812	9.05588	0.0501863	0.539236	0.00256769	1.44511	0.00401189	2.83125	0.0066709	9.47819	0.0127055	1.80645	0.00749787	1.34268	0.00824423	0.346551	0.00117709	0.185203	0.000730851	1.51451	0.00615121	1.72129	0.00178241	0.711835	0.00111794	1.70893	0.0111827	0	0	0.918026	0.0136482	3.14207	0.00904686	0.0763573	0.0104122	0.298481	0.0194921
PI 512356	W-342	1.79972	0.0135468	14.9043	0.384811	3.23362	0.00543381	0.70359	0.00332535	5.05501	0.0477244	19.8847	0.117386	15.6855	0.0891754	0.552693	0.0029899	1.83533	0.00761022	3.49428	0.0404717	8.79669	0.0812091	0.939466	0.0982255	1.4985	0.020591	0.467736	0.0082297	0.211019	0.00150714	2.64689	0.0332614	2.23903	0.00908717	0.839895	0.0028238	2.63639	0.00424101	0	0	1.68125	0.00596424	6.10106	0.0510144	0.952374	0.785498	0.358488	0.0174977
PI 512360	W-343	1.26399	0.00575512	24.404	0.469808	4.72581	0.0378043	0.613873	0.0049042	3.71956	0.0284439	28.095	0.130558	9.85258	0.0218466	1.57365	0.0103514	1.19536	0.00117685	2.49521	0.023003	7.21126	0.028746	1.35207	0.0142022	1.04282	0.00902081	0.422259	0.00210051	0.157752	0.00109418	2.00734	0.0132914	1.39178	0.00902512	0.606555	0.00245403	1.565	0.00614922	0	0	0.88523	0.0115291	1.60011	0.0168586	0.858427	0.699435	0.295565	0.00196082
PI 512363	W-344	1.37062	0.0118465	21.8782	0.175157	3.72028	0.0418026	0.603027	0.00876926	4.34996	0.0323171	27.3453	0.369505	11.0302	0.152994	1.04707	0.00425653	1.58078	0.0155419	3.26524	0.0315904	7.17471	0.063213	1.71324	0.0240525	1.13494	0.0118094	0.382653	0.00456179	0.112801	0.00095508	1.68137	0.0129829	1.66628	0.0128309	0.795144	0.00454038	1.90079	0.0073235	0	0	1.44754	0.0123871	1.57102	0.0182787	1.78753	0.781328	0.20279	0.00103613
PI 512390	W-345	1.55265	0.00809811	21.0861	0.170183	3.30237	0.0153069	0.482137	0.0024428	2.95444	0.0170301	31.2989	0.182297	11.7943	0.0428519	0.413522	0.000640851	1.5482	0.00927085	3.15822	0.0142822	4.88495	0.0296194	0.985997	0.00101563	0.566646	0.00735667	0.31398	0.000679053	0.200389	0.000516629	1.27935	0.00577114	1.95925	0.00561783	0.472379	0.00188981	1.27132	0.00722426	0	0	0.833413	0.000788299	4.22674	0.0309346	0.00597991	0.00464318	0.322259	0.0140933
PI 512393	W-346	1.36632	0.00251627	18.6966	0.232049	4.87753	0.0389007	0.320852	0.00108119	4.17509	0.0369117	16.3734	0.190475	6.10302	0.0468564	1.99503	0.0159659	1.62643	0.0154627	4.1379	0.0123533	19.3103	0.14696	3.53164	0.0412861	1.18517	0.0129383	0.606144	0.00638718	0.0944887	0.00077461	2.13018	0.0168944	2.04718	0.018621	0.948216	0.00266975	2.15873	0.0151346	0	0	1.3029	0.0165592	2.52079	0.0195445	1.81424	0.79081	0.14167	0.00590216
PI 512395	W-347	2.55073	0.0670253	24.5272	0.913245	2.98427	0.0213863	0.662621	0.00628652	4.97499	0.0593573	13.6286	0.249632	4.89307	0.0427856	3.72976	0.0626369	2.64778	0.0564804	3.26007	0.0860787	12.1657	0.200513	6.77896	0.23862	1.06691	0.0245591	0.761241	0.0144553	0.136837	0.00204705	1.83944	0.0490055	2.06507	0.0752771	0.371976	0.011651	1.72996	0.0518522	0	0	0.976123	0.0356852	2.79741	0.086387	2.14194	0.928204	0.218673	0.00581343
PI 512407	W-348	1.62067	0.0155627	17.8273	1.72474	2.79046	0.190456	0.599225	0.0441546	5.81905	2.17708	28.5583	2.69145	9.38215	0.449742	0.558997	0.0138729	2.03809	0.280211	4.54984	1.56241	5.69188	0.394405	1.55507	0.116713	1.4969	0.146542	1.09423	0.588157	0.269198	0.0259849	2.21957	0.0172879	1.89666	0.0850992	0.757413	0.063979	2.25987	0.10758	0	0	1.51967	0.139101	4.01077	0.217582	0.254957	0.254957	0.4528	0.0413871
PI 518606	W-349	1.85284	0.0142124	21.6926	0.215245	3.71795	0.0290024	0.646038	0.00946229	3.59412	0.00361537	31.4878	0.182769	10.4147	0.0620875	0.292519	0.00239422	2.46904	0.0266725	2.74175	0.0326181	5.15669	0.0187569	0.927372	0.010657	1.18387	0.00389136	0.29251	0.00104803	0.237381	0.000871033	1.9605	0.0185372	1.40369	0.0282772	0.723432	0.00886834	1.84552	0.0185324	0	0	1.09402	0.0140164	2.89096	0.018896	0.0573315	0.0356827	0.388391	0.0142572
PI 518612	W-350	1.15176	0.0186727	24.193	0.65783	6.02539	0.0391008	2.5285	0.0471673	3.88585	0.043683	18.9988	0.205941	6.70197	0.0603545	0.926695	0.0292489	1.54113	0.0379582	4.54675	0.112782	11.1834	0.253784	2.98588	0.102875	0.780742	0.0210607	0.695716	0.0167553	0.0832104	0.00219104	2.13536	0.0686244	1.34663	0.063778	0.358588	0.0141541	2.55485	0.0711974	0	0	0.775708	0.0280947	2.39323	0.0872299	0.906721	0.625987	0.154456	0.0128322
PI 537465	W-351	1.95052	0.00414528	15.2406	0.168994	4.22077	0.0275216	0.192721	0.0628794	6.02156	0.0172302	23.8306	0.0922814	7.69585	0.0379831	0.925541	0.00672033	1.85221	0.0206759	3.76787	0.0301147	13.2301	0.0620549	3.82776	0.0130102	1.34296	0.00870611	0.416932	0.00199123	0.200276	0.00132326	2.25622	0.00558204	1.8368	0.0116696	0.854894	0.00149457	1.98451	0.00850228	0	0	1.11953	0.0210844	2.59223	0.00135714	0.31968	0.0193674	0.364524	0.00228882
PI 538888	W-352	1.97841	0.0339778	11.4948	0.257004	3.37105	0.0409305	0.332019	0.00358478	6.04628	0.0588909	18.1793	0.136684	5.98957	0.0823469	0.267622	0.00581053	2.43583	0.0516635	5.11447	0.0994239	13.7263	0.168654	10.2476	0.192207	3.2204	0.0357246	0.233743	0.00294807	0.177956	0.00121218	1.83621	0.0400022	2.20941	0.0817337	0.619448	0.0193148	3.15775	0.070878	0	0	1.84631	0.0471585	2.63743	0.0521326	1.7634	0.685526	0.22011	0.00475169
PI 561138	W-353	1.52446	0.0487891	15.3038	0.219859	3.81309	0.0249133	0.640252	0.00997922	2.92097	0.0458679	29.3298	0.502512	12.1328	0.0735018	0.475939	0.00431463	1.39524	0.0160131	2.87749	0.0942225	8.43328	0.245334	1.36671	0.0443416	1.12389	0.0329302	0.26251	0.00731554	0.160641	0.00428794	1.89701	0.0477105	2.27904	0.0544522	0.504533	0.0104267	2.15976	0.0393757	0	0	1.17179	0.0320229	5.4069	0.18638	0.999122	0.966347	0.261418	0.00758495
PI 270144	W-354	1.0721	0.0123514	15.8782	0.0453472	3.92063	0.0195189	0.893799	0.0099804	2.95724	0.0276715	40.3193	0.293692	10.3502	0.0760952	0.390785	0.00369553	1.45394	0.0133194	4.47274	0.024904	4.40568	0.0165663	0.809493	0.00218625	0.98597	0.0148014	0.332607	0.00299632	0.163844	0.00116919	1.48803	0.0143323	1.40695	0.0152346	0.509709	0.00527766	1.53087	0.0126817	0	0	0.776788	0.00489153	1.18855	0.00707271	0.663135	0.59773	0.28298	0.0173844
PI 270145	W-355	1.56238	0.0405228	10.7482	0.174697	2.44839	0.00960424	0.950361	0.00791861	7.27273	0.0361236	30.0645	0.197172	5.02472	0.0558401	0.279986	0.0066816	2.73863	0.0338559	7.71308	0.131491	3.78185	0.0188193	4.61864	0.127539	2.87351	0.0269834	0.270359	0.00267949	0.177073	0.000709832	2.23134	0.0430594	2.52204	0.0630574	0.648841	0.0137076	3.48704	0.0657063	0	0	2.24507	0.0549592	3.45987	0.0629651	1.12516	0.644743	0.198505	0.00557402
PI 276657	W-356	1.59521	0.0329587	28.7466	0.118292	3.31836	0.0187081	0.448669	0.00544414	4.6755	0.0199938	19.0329	0.184423	7.52449	0.066649	0.701187	0.0123023	1.42949	0.0201934	4.49275	0.0197271	6.60512	0.043838	6.57551	0.0729794	1.41079	0.00646241	0.561681	0.0101753	0.0894655	0.000866706	1.86214	0.0268235	1.61938	0.0267603	0.690855	0.0125726	2.30911	0.030698	0	0	1.2201	0.0164021	1.88525	0.0231522	1.35207	0.529768	0.163495	0.00309505
PI 276658	W-357	1.57605	0.0128639	28.7532	0.253036	2.43439	0.026611	0.279303	0.00213335	3.46464	0.00365211	11.6216	0.0296411	6.4557	0.0367938	13.5686	0.0447649	1.09702	0.00931031	2.51726	0.0198091	12.714	0.0105431	5.18328	0.0405035	1.12187	0.00636338	1.206	0.0120419	0.076005	0.000174636	1.32864	0.00787707	1.02887	0.00418032	0.640253	0.00526497	1.12391	0.0127919	0	0	0.76884	0.00622715	0.872572	0.00865897	0.212732	0.0172314	0.117704	0.0109633
PI 276659	W-358	1.46007	0.0168373	17.4179	0.205188	2.54978	0.00948083	0.610208	0.00371565	2.38846	0.0149638	35.8406	0.135635	10.9537	0.00497796	0.521781	0.00473157	1.26701	0.00665646	3.10245	0.0597359	5.7293	0.0489166	0.798695	0.0250047	1.11547	0.0045682	0.364469	0.00765777	0.254551	0.0019342	1.77009	0.00369569	1.57099	0.00761653	0.698386	0.00389321	1.63772	0.00848999	0	0	0.718265	0.00788586	3.74631	0.0189643	0.575082	0.575082	0.393416	0.00175019
PI 357743	W-359	2.10831	0.0447685	14.2313	0.080138	2.68509	0.0298407	0.43197	0.00522497	8.43035	0.0901558	22.4476	0.18273	7.77719	0.0786936	0.694674	0.0139675	2.45096	0.0250603	3.85635	0.0180186	13.1066	0.0615354	2.68184	0.0186279	1.71056	0.0207301	0.398703	0.00492332	0.161178	0.00183719	1.86916	0.0273549	1.95176	0.0292583	0.90414	0.0119296	2.86442	0.0377283	0	0	1.72176	0.0177863	2.29848	0.0263853	1.28456	0.694699	0.265344	0.00425186
PI 370427	W-360	1.14622	0.0216941	18.856	0.397501	2.65727	0.0170799	0.718974	0.00734205	2.55887	0.0178	36.6062	0.598091	9.54508	0.0194034	0.712307	0.00987333	1.43982	0.026573	4.42645	0.139064	5.182	0.0892617	1.39885	0.0514361	1.00056	0.0185287	0.473989	0.00941876	0.296289	0.00596568	1.44433	0.0303811	1.48098	0.0472444	0.683835	0.0169597	1.68189	0.0401569	0	0	0.948759	0.0237082	2.31354	0.0638278	0.595224	0.595224	0.469028	0.011291
PI 370430	W-361	1.2694	0.0143045	14.719	0.171777	2.84394	0.0157484	0.985505	0.00507226	4.3341	0.014493	30.9106	0.153132	15.5475	0.0407733	1.15443	0.00654227	1.13783	0.0108963	7.54882	0.0599157	5.51512	0.0388879	0.74494	0.0259622	0.764704	0.00586364	0.662432	0.00199969	0.315654	0.00142736	1.3476	0.00616611	1.15013	0.00579409	0.753777	0.00163749	1.43037	0.00622954	0	0	0.743676	0.0041987	1.73962	0.00439399	0.0362139	0.0133164	0.796093	0.00922964
PI 379223	W-362	1.68623	0.00812601	17.9231	0.1156	3.95607	0.0269613	0.964863	0.00844436	5.46336	0.0587217	29.3018	0.355931	9.44662	0.0396428	1.12431	0.0100618	2.00483	0.0113465	3.50629	0.0369754	5.47587	0.0800302	0.915081	0.0128014	0.807045	0.00605583	0.607908	0.00740728	0.235323	0.00203258	2.05928	0.0109894	2.33431	0.00677874	0.565913	0.00338819	2.08685	0.012857	0	0	0.83316	0.0117261	2.828	0.040019	1.04837	0.824506	0.444637	0.00497146
PI 379229	W-363	1.76191	0.0311465	18.4278	0.250426	3.26344	0.0273828	0.714234	0.00530133	4.42525	0.0137838	29.2867	0.203199	12.7013	0.0379981	0.715696	0.0125241	1.31881	0.0242129	3.34023	0.021784	6.79035	0.0516501	2.26298	0.0131644	0.672316	0.00124706	0.339844	0.00117756	0.200853	0.000857089	1.35024	0.0101437	2.07556	0.0406456	0.599701	0.00689846	1.85577	0.0265508	0	0	1.0958	0.0159452	3.46965	0.0156933	0.163801	0.0384702	0.346838	0.0268173
PI 379231	W-364	1.1012	0.00520573	16.1549	0.205124	2.88845	0.0117724	0.256909	0.0624383	7.34672	0.00702372	26.2445	0.0979663	7.39609	0.0324777	0.27127	0.00140634	1.85873	0.00627213	3.50567	0.0413652	11.7932	0.0291658	2.78583	0.0220339	1.17998	0.00168947	0.280794	0.000791216	0.198869	0.000807486	1.74974	0.0118235	1.35814	0.00195015	0.55263	0.0041115	1.3941	0.00680146	0	0	0.726952	0.00910898	1.9836	0.0120092	3.41469	0.193122	0.357967	0.0251735
PI 379251	W-365	1.18328	0.0218228	22.6771	0.551465	1.70695	0.0319036	0.817096	0.015631	1.7269	0.0357797	35.3905	0.767661	6.03082	0.133756	0.309796	0.00576115	1.85489	0.0366569	3.03864	0.0936061	5.12443	0.137229	3.91965	0.0684045	0.652747	0.0182249	0.50831	0.0111503	0.316543	0.00696563	1.48228	0.0279254	1.16458	0.0255833	0.793676	0.0138507	1.3369	0.0254246	0	0	1.33449	0.0408272	1.83944	0.0352732	3.60946	1.82047	0.512437	0.017142
PI 476324	W-366	3.02613	0.00753133	14.1615	0.175384	2.23464	0.0191171	0.733512	0.00953646	12.3152	0.0851937	26.8915	0.231145	7.99395	0.0508566	0.449052	0.00304277	0.996512	0.0136349	4.02337	0.0599323	8.56469	0.113481	1.69667	0.0142271	1.38336	0.0136588	0.345915	0.0025022	0.222604	0.00166608	1.44438	0.00430788	1.57387	0.0170266	1.00617	0.006611	1.59962	0.0126218	0	0	0.725683	0.00535948	3.18366	0.0202618	2.21153	0.676321	0.365546	0.027482
PI 512350	W-367	1.70487	0.0296654	21.7984	0.406436	4.03872	0.0313241	0.680309	0.00399824	3.63282	0.0292256	20.643	0.0749368	6.0761	0.026593	4.08407	0.0222493	1.36114	0.00321883	3.70316	0.0428208	9.35948	0.112623	7.85572	0.122326	1.01172	0.00970782	0.895505	0.00495875	0.0774227	0.000321076	2.38131	0.0111544	1.54534	0.012619	0.540385	0.00761958	1.98413	0.013172	0	0	0.912305	0.00890615	1.34396	0.00627637	1.42688	0.605349	0.123144	0.00447271
PI 357731	W-368	0.91847	0.0250148	16.7232	0.107153	3.10547	0.0470284	0.600571	0.00879548	5.98315	0.0520102	35.4744	0.517808	12.3374	0.175245	0.332593	0.00851416	1.04679	0.0247764	2.182	0.0122897	6.3697	0.0820801	1.12329	0.135377	0.895238	0.0235581	0.394627	0.00743318	0.197585	0.00669133	1.49218	0.0355	0.958949	0.0371891	0.534756	0.012439	1.40326	0.0401698	0	0	0.953482	0.026673	2.06331	0.0390891	2.69319	1.14986	0.320809	0.00401304
PI 518610	W-369	0.913967	0.0215954	14.3409	0.0479694	3.10747	0.0272429	0.12531	0.00171303	6.94601	0.0825167	26.7188	0.271394	9.77703	0.0667241	0.464819	0.00590642	1.49326	0.0224053	4.19828	0.0202586	14.8705	0.15167	3.47013	0.056033	1.00357	0.0167725	0.31968	0.00497724	0.197107	0.00258657	1.67525	0.0290755	1.1451	0.0312136	0.700472	0.0132943	1.36952	0.0298366	0	0	0.789996	0.0186286	1.61962	0.0329278	2.45791	0.966239	0.28094	0.00416431
PI 212208	W-370	0.913633	0.138867	16.6713	0.0175691	3.30962	0.057281	0.731733	0.00938832	9.27612	0.108438	33.2293	0.473568	9.13476	0.127316	1.12674	0.0272061	0.715953	0.0141028	2.86274	0.0333724	5.53986	0.112138	0.564046	0.0252659	0.613309	0.0182107	0.580797	0.0101518	0.226669	0.00412872	1.43084	0.0283134	1.12939	0.031626	0.715269	0.0127562	1.48981	0.0411436	0	0	0.697353	0.0181397	3.16465	0.050614	3.30026	1.26826	0.382671	0.0284999
PI 379237	W-371	1.32072	0.0178669	11.9839	0.0556951	2.75958	0.00870921	0.515541	0.00784968	5.78101	0.0887387	27.1037	0.354452	15.8712	0.0510792	1.30129	0.0153013	1.54142	0.0234303	3.71269	0.0812327	10.6042	0.112978	1.89082	0.0562447	1.37572	0.0257866	0.509965	0.0110172	0.200505	0.00409456	1.75655	0.0443711	1.54486	0.0548802	0.637731	0.0180382	1.97298	0.0546451	0	0	1.31991	0.0380284	2.35736	0.0491788	1.26381	1.02564	0.313917	0.00491352
PI 163574	W-372	1.37584	0.00821442	21.378	0.234986	3.82454	0.0252353	0.110561	0.000948997	5.38522	0.045366	23.4684	0.155577	7.61625	0.0443203	0.402988	0.00301358	1.71843	0.00958468	3.72969	0.0264226	13.7596	0.0812462	3.06774	0.0298246	1.05069	0.0153018	0.265756	0.0013751	0.166585	0.000832792	1.6951	0.0128198	1.45985	0.00657644	0.469504	0.00331936	1.28425	0.00282889	0	0	0.705036	0.0087593	1.19646	0.0165237	0.918598	0.645834	0.264086	0.0178605
PI 269678	W-373	1.18243	0.0167113	18.6996	0.546012	3.15152	0.0336133	0.182704	0.00145679	3.37822	0.0406489	35.1823	0.0560267	8.56052	0.0623695	0.315623	0.0024691	1.2006	0.0106418	3.18864	0.0364135	8.20693	0.1102	2.78507	0.00903316	0.876837	0.00350896	0.311547	0.000709102	0.276695	0.00092386	1.45807	0.00982981	1.54513	0.0215785	0.518298	0.0049014	1.15685	0.0107713	0	0	0.793279	0.0119516	2.3442	0.0302058	0.0150466	0.0150466	0.416946	0.00211496
PI 438675	W-374	2.53405	0.0490473	15.1689	0.314174	2.94671	0.0118625	0.131842	0.000182347	6.18058	0.045223	17.043	0.0499917	6.66689	0.00642262	0.781007	0.0148327	2.15841	0.0179032	4.47013	0.0686525	18.6618	0.258384	3.46075	0.0386765	1.92882	0.0193546	0.438839	0.00293608	0.200263	0.000981749	2.64449	0.0239001	2.17583	0.0361824	0.984431	0.00999505	2.90752	0.0326098	0	0	1.54405	0.0116901	2.98937	0.020203	0.334858	0.0332495	0.329758	0.0182969
Cole's Early	W-375	1.31929	0.0151609	17.258	0.152102	2.95647	0.0536225	0.915294	0.00401165	6.0728	0.0892884	25.1649	0.285648	13.2615	0.0802651	0.924841	0.00337249	1.82302	0.0262297	4.06936	0.0627432	6.8982	0.0655305	2.57227	0.0204928	0.902689	0.00736259	0.484812	0.00413567	0.261531	0.00196049	2.19031	0.021132	1.57689	0.0180078	0.715313	0.00932208	1.90163	0.0248623	0	0	1.12605	0.0149719	2.19972	0.0249878	0.939483	0.70881	0.553143	0.0186172
Garrisonian	W-376	1.53876	0.0163031	18.438	0.129137	3.70256	0.00548776	0.376943	0.000776133	7.90896	0.0454413	17.6192	0.0241606	7.50601	0.069333	0.525451	0.00216523	1.48747	0.0117476	4.21371	0.0124069	16.6086	0.0577236	4.21931	0.0329255	0.941341	0.00155494	0.375179	0.00445303	0.221054	0.00099538	2.1186	0.0112126	1.88438	0.0105415	0.689098	0.00346796	1.99049	0.0138407	0	0	0.91656	0.00170897	3.01811	0.0168488	0.408819	0.031777	0.342031	0.0137153
Klondike Stripe	W-377	1.89917	0.0103847	18.0505	0.201377	2.86386	0.0177953	0.527521	0.000430902	6.70685	0.0891418	33.6216	0.185996	11.971	0.0385482	0.358142	0.00161093	0.646758	0.00408133	2.15021	0.0136306	6.22868	0.0410014	1.63875	0.0124815	0.694055	0.00657264	0.313811	0.00133752	0.259535	0.00142184	1.50169	0.00580004	1.68752	0.00824015	0.623964	0.00401086	0.953975	0.0115368	0	0	0.424217	0.0093055	3.19307	0.0235721	0.293182	0.0337201	0.400318	0.00134392
Fairfax	W-378	1.34584	0.0113329	23.1562	0.105239	3.85529	0.0233594	0.517284	0.0030596	3.84794	0.0305867	28.6003	0.0703321	6.73638	0.00666463	0.515929	0.00720027	1.41361	0.0128688	4.02884	0.014551	11.6248	0.0582262	1.93433	0.0196235	0.736435	0.00765458	0.395359	0.00204552	0.170232	0.000295702	2.32776	0.00894019	1.23216	0.0191093	0.565292	0.00337291	1.80133	0.010222	0	0	0.9786	0.00238753	1.5937	0.00468471	0.136276	0.0142673	0.261976	0.0164065
Klecky Sweet	W-379	1.1039	0.0056838	15.5187	0.116425	3.60926	0.00554129	0.534197	0.0032867	10.8613	0.0311824	32.8905	0.128128	12.4109	0.0725086	0.557447	0.00645762	1.06602	0.00284601	2.69685	0.0493575	4.85625	0.0448271	1.24534	0.128743	0.84665	0.00275819	0.372372	0.00170722	0.247719	0.00183807	1.64842	0.00978198	1.01906	0.0126798	0.48683	0.00319402	1.24108	0.00434901	0	0	0.777906	0.00301879	2.72543	0.0208633	0.698331	0.0545047	0.40426	0.0251392
Mickie Lee	W-380	2.19958	0.0599489	26.794	0.375119	3.61139	0.0349703	0.545052	0.0105473	4.53034	0.0544287	31.2559	0.736353	7.79956	0.0497229	0.536553	0.0128592	0.753208	0.0151827	2.58827	0.0952012	4.23837	0.0998487	1.57589	0.0576633	0.646935	0.0173444	0.287675	0.00815444	0.197682	0.00513298	1.55766	0.0493085	1.40355	0.0588866	0.41604	0.0125721	1.21709	0.0385936	0	0	0.530043	0.0234103	2.05542	0.0693244	1.2489	1.06178	0.317212	0.0179322
Calhoun Gray	W-381	1.19735	0.0154094	15.8808	0.0770059	3.45517	0.00421943	0.697219	0.0133972	4.70593	0.0852558	37.4111	0.506783	9.96452	0.0354596	0.418332	0.00993981	1.19181	0.0232895	3.61239	0.0964251	6.09648	0.107282	0.956086	0.479332	0.791816	0.0199352	0.453285	0.012358	0.289969	0.0079556	1.71747	0.0491792	1.27777	0.0395095	0.611876	0.0160145	1.29213	0.0335701	0	0	0.68922	0.025835	2.70114	0.0821862	0.974986	0.912737	0.536705	0.042354
Sweet Princess	W-382	1.61223	0.0169266	20.8765	0.277665	3.17989	0.0265431	0.500661	0.00261968	4.0547	0.0501105	22.5688	0.0752867	8.16037	0.0492369	0.359543	0.00124169	1.50379	0.00702312	4.86526	0.100851	16.3584	0.236078	2.83104	0.023918	0.918973	0.00910923	0.293443	0.000121895	0.263481	0.00049563	1.82357	0.0135883	1.42466	0.0236951	0.599462	0.00298902	1.2289	0.00996544	0	0	0.693704	0.00665532	2.51609	0.0100587	0.126936	0.0209653	0.431156	0.0281885
Georgia Rattle Snake	W-383	2.10598	0.03917	23.1209	0.631595	2.85282	0.0327385	0.885985	0.0175656	5.23717	0.0623431	30.4537	0.594112	7.21278	0.00663672	0.742163	0.0205305	1.568	0.0441944	1.57052	0.0437125	5.68213	0.0834268	1.79201	0.0680803	1.43611	0.0266577	0.297503	0.00838984	0.183573	0.00508756	1.85181	0.0641755	1.56044	0.0749378	0.602206	0.0213979	1.66153	0.0615849	0	0	1.14156	0.0530417	2.90205	0.112378	2.37456	1.07989	0.291695	0.0142833
Orange Tender Sweet	W-384	1.0049	0.102949	21.1523	0.117072	2.72823	0.0143016	0.402786	0.00237982	3.27566	0.015391	38.5652	0.246662	8.5694	0.031118	0.95906	0.00631593	1.03938	0.00575313	1.60785	0.00476422	4.26818	0.0154024	1.49951	0.133836	1.35489	0.00968072	0.501929	0.00274643	0.354704	0.000892728	1.10561	0.00669453	1.57717	0.0134935	0.515741	0.00275036	0.982724	0.00558194	0	0	0.713316	0.010061	3.98231	0.0201758	0	0	0.541443	0.00136272
Bush Sugar Baby	W-385	1.00933	0.000172431	21.0996	0.284143	3.19134	0.0114448	0.149778	0.000204372	2.63828	0.0148289	33.5388	0.148328	6.40022	0.0500159	0.791561	0.00362221	0.871266	0.00149304	3.3794	0.014212	8.62956	0.0297623	2.69117	0.0163823	0.885069	0.0015681	0.400176	0.00125441	0.223621	0.000336433	1.11392	0.00202815	1.40029	0.00712046	0.397453	0.00214991	0.809341	0.00460888	0	0	0.467329	0.00380343	4.3266	0.0419123	0.00334746	0.000554721	0.469836	0.00169197
Crimson Sweet	W-386	4.26592	0.0705308	26.8035	0.625814	1.45619	0.00213597	0.30511	0.00250526	3.87299	0.024928	27.2002	0.0788541	8.19213	0.0457638	0.212057	0.00104806	1.89016	0.0227397	1.61914	0.0155113	5.86336	0.0321557	1.87213	0.0225595	0.804328	0.00222999	0.227592	0.000620173	0.186911	0.000579345	1.54684	0.00761978	2.48761	0.0143048	0.649624	0.00557435	1.35884	0.0128231	0	0	0.690821	0.0081051	3.05992	0.0132339	0.178481	0.0223842	0.276993	0.0138446
Sugarbaby	W-387	1.31913	0.00640243	17.2176	0.447302	2.48235	0.0241896	0.167204	0.00124878	2.46644	0.0203591	29.8169	0.0544003	6.32711	0.0272385	0.247244	0.00181906	4.61514	0.0210384	4.37292	0.0489617	11.1753	0.0357691	2.15899	0.0123933	1.008	0.0058449	0.270634	0.00152379	0.245412	0.0014315	1.78733	0.0117161	1.56608	0.0137885	0.489866	0.00249184	1.61245	0.0126517	0	0	0.689825	0.0049457	3.3942	0.0267005	0	0	0.431135	0.0249096
Jubliee	W-388	1.36998	0.00237712	22.8289	0.213267	2.55318	0.0147723	0.431137	0.00363873	1.7341	0.00721765	34.8494	0.222414	7.89455	0.0185887	0.337096	0.000766454	1.04873	0.0111591	2.97671	0.0224629	5.79311	0.0259812	1.87984	0.00649035	0.708193	0.00590538	0.265542	0.00123751	0.240232	0.000854488	1.20152	0.00679807	1.46154	0.0110023	0.455563	0.00142388	0.970447	0.00696976	0.175335	0.175335	0.682462	0.00510663	3.14635	0.0159952	0	0	0.379432	0.00105911
PI 458739	W-389	1.74249	0.0227317	17.2431	0.139539	4.02074	0.0254417	0.903352	0.0146818	5.21579	0.0648234	19.9376	0.146963	13.5665	0.108544	1.11839	0.00793292	2.48623	0.024278	3.61305	0.023746	6.06411	0.105435	1.00302	0.00811632	1.79108	0.0412406	0.557116	0.00852705	0.213217	0.00168021	2.45133	0.0284611	2.41115	0.0170504	0.749389	0.007211	2.76663	0.0160397	0.938361	0.469207	2.18636	0.0252285	3.22707	0.0101875	0.231239	0.00796659	0.336798	0.00208437
PI 543212	W-390	1.63939	0.00819659	19.3134	0.272025	2.86043	0.0130476	0.705619	0.00239385	6.40499	0.0110267	19.0178	0.0581903	8.10326	0.0178514	0.460015	0.00131772	1.64964	0.0125406	4.93202	0.0393978	14.4407	0.0788755	2.91349	0.0170873	0.980087	0.000200594	0.45	0.000705075	0.256778	5.03309e-05	2.31684	0.0144217	2.01794	0.0189987	0.889074	0.00588515	1.85869	0.0135446	0	0	1.02992	0.0078896	3.58445	0.0398923	0.332043	0.0353846	0.534995	0.010828
Golden Honey	W-391	2.18425	0.00497229	15.1213	0.194554	3.22322	0.0134925	0.169002	0.000776518	8.29844	0.0197462	19.0325	0.0904758	12.8216	0.0482215	0.414033	0.000911134	1.88558	0.0114352	4.4196	0.0272597	13.7212	0.0581195	1.09321	0.0128682	1.15335	0.0125437	0.393862	0.0013202	0.250139	0.000643662	2.31286	0.00744979	2.03842	0.00514623	0.796778	0.0012696	1.97836	0.0087487	0.261824	0.261824	1.16996	0.0105925	2.57139	0.00453128	0.534419	0.0341949	0.599459	0.00682729
Missouri Heirloom Yellow Flesh	W-392	2.12356	0.00262756	17.227	0.119274	3.55939	0.00893641	0.799922	0.00393102	3.48596	0.0191271	26.5203	0.209335	9.4428	0.0520729	0.462622	0.00300919	1.07039	0.00404602	3.6377	0.0440358	10.75	0.0704659	2.69583	0.0323503	0.655055	0.0116453	0.37634	0.00265669	0.24214	0.000574225	2.09288	0.00527113	2.28307	0.015684	0.657282	0.00536272	1.97879	0.0134777	0.394365	0.197215	0.967671	0.0168835	4.40918	0.0370743	0.0653666	0.0247129	0.428684	0.0403774
Colorado Preserving or Red Seeded Citron	W-393	1.25174	0.00689246	29.0152	0.256331	1.67477	0.0294315	1.11996	0.0293365	1.8217	0.0338202	24.3775	0.558108	13.0876	0.201797	0.41003	0.0124217	1.57367	0.0388756	1.63079	0.0630987	6.01786	0.194368	2.1602	0.0830453	1.18683	0.0365685	0.429235	0.0143592	0.32679	0.0101088	1.55061	0.055236	1.39988	0.0658137	0.40702	0.0142814	1.92291	0.07213	0.978466	0.492126	1.14391	0.0333543	1.96629	0.0697234	1.50678	1.50678	0.522563	0.01997
Hopi Yellow	W-394	1.58161	0.00206537	24.5078	0.580659	5.24019	0.032542	0.801568	0.0158523	3.8088	0.0660077	25.1389	0.386387	7.68317	0.050197	0.672155	0.0233777	1.02612	0.0412288	2.89892	0.0678022	8.77948	0.167788	2.42333	0.0919022	0.959459	0.0214492	0.421659	0.0123633	0.145521	0.00426822	2.34557	0.0806276	1.78118	0.0794126	0.548557	0.0242557	1.99336	0.0864831	0.483158	0.243735	1.14869	0.0477119	1.74699	0.0641696	1.06245	0.840277	0.270951	0.0116503
Japanese cream fleshed suka	W-395	1.18358	0.0181388	18.6	0.0142018	2.58683	0.0174929	0.39546	0.00577707	2.84747	0.0104069	23.6775	0.0941048	9.88257	0.0681173	0.906657	0.00771566	1.4883	0.0118803	4.64226	0.0540355	15.1062	0.139958	4.59091	0.0415375	1.02779	0.000509669	0.459895	0.00188281	0.175301	0.000336404	1.69659	0.00748673	1.69615	0.0179759	0.559048	0.00373032	1.91597	0.0220013	0.590459	0.0113723	0.888919	0.00602626	1.89592	0.0183991	0.0772003	0.0163394	0.289607	0.00424739
Ledmon	W-396	1.20327	0.0358671	25.3947	0.32234	3.38789	0.0283542	0.538522	0.0102659	2.90516	0.0235017	32.9727	0.112887	6.78884	0.0233586	0.540086	0.0151465	1.48456	0.0176672	2.82895	0.0321153	6.40313	0.0160776	2.57613	0.324457	0.86052	0.00719883	0.396522	0.00616685	0.161502	0.00153026	1.71072	0.0248482	1.29696	0.0304095	0.498988	0.00970224	1.47617	0.0217963	0.464737	0.232389	1.05091	0.0249549	0.895572	0.0113576	0.149806	0.0295928	0.279625	0.0206148
Charleston Gray	W-397	1.75009	0.0238333	23.2799	0.415283	3.03734	0.0168812	0.542386	0.00413324	3.5373	0.0138384	28.6	0.249215	11.0012	0.109248	0.357623	0.00415061	1.80433	0.0119054	1.71566	0.0132278	3.36131	0.0221945	2.23426	0.00611631	1.50066	0.0114769	0.261618	0.000783756	0.217824	0.00107902	1.50392	0.0128411	1.93392	0.0274729	0.819559	0.00797035	1.77294	0.0158984	0.813242	0.0116513	1.10099	0.0057309	3.17211	0.0149055	0.169167	0.0317824	0.362614	0.00547607
[truncated: 8 more columns]
