# Supplementary material for: Genome-wide association study and population structure analysis of seed-bound amino acids and total protein in watermelon
Source: PeerJ. 2021 Oct 19;9:e12343. doi: 10.7717/peerj.12343 (PMC8533027; doi:10.7717/peerj.12343)
Supplement: Supplemental Information 14 [file peerj-09-12343-s014.xlsx]

## Sheet: MLM additive genes
Table S4: SNP chromosomal positions and candidate genes significantly associated with individual amino acids identified by GWAS.
Amino acid	SNP name	Marker	Chromosome	Position	P-Value (Initial Model)	-LOG10(P-Value)	Regression Beta	Beta Standard Error	Expected P	Prop. Var. Explained	Manhattan Category	Actual Sample Size	Call Rate	Minor to major Allele	Minor Allele D Frequency	Major Allele d Frequency	Gene Names	Gene Region (Combined)	Annotation
Histidine	S2_8914183	CG_CHR02:8914183-SNV	CG_Chr02	8914183	7.08781e-05	4.14949	-87.473	21.4209	0.000103972	0.0971326	Chr CG_Chr02	128	0.810127	G→T	0.386719	0.613281	ClCG02G007550	intron	HemK methyltransferase family member 2
	S8_23932593	CG_CHR08:23932593-SNV	CG_Chr08	23932593	9.49765e-05	4.02238	135.649	33.8472	0.000311915	0.093894	Chr CG_Chr08	130	0.822785	T→C	0.119231	0.880769	ClCG08G011200	exon	GMP synthase [glutamine-hydrolyzing]
	S9_31937559	CG_CHR09:31937559-SNV	CG_Chr09	31937559	0.000515111	3.2881	121.822	34.3417	0.000519859	0.0750885	Chr CG_Chr09	133	0.841772	C→A	0.0977444	0.902256	ClCG09G016240	exon	Leucine-rich repeat (LRR) family protein LENGTH=699
	S10_22080264	CG_CHR10:22080264-SNV	CG_Chr10	22080264	0.000823677	3.08424	105.363	30.8832	0.000935745	0.0698474	Chr CG_Chr10	154	0.974684	G→A	0.198052	0.801948	ClCG10G009730	exon	Serine/threonine protein phosphatase 2A activator
Arginine	S11_30966333	CG_CHR11:30966333-SNV	CG_Chr11	30966333	3.68e-07	6.43436	2098.09	515.533	0.000103972	0.0965413	Chr CG_Chr11	149	0.943038	C→A	0.0872483	0.912752	ClCG11G017780	exon	Tyrosine aminotransferase, putative
	S10_534411	CG_CHR10:534411-SNV	CG_Chr10	534411	4.73e-05	4.32526	2181.61	711.189	0.00675816	0.0572343	Chr CG_Chr10	156	0.987342	A→C	0.0544872	0.945513	ClCG10G000460	exon	DNA-directed RNA polymerase
	S1_11538718	CG_CHR01:11538718-SNV-2	CG_Chr01	11538718	8.84e-05	4.05355	-1039.01	404.423	0.022146	0.0976954	Chr CG_Chr01	133	0.841772	T→A	0.364662	0.635338	ClCG01G009110	intron	snRNA-activating protein complex subunit, putative
	S1_11538718	CG_CHR01:11538718-MIX	CG_Chr01	11538718	8.84e-05	4.05355	-1039.01	404.423	0.0223539	0.0976954	Chr CG_Chr01	133	0.841772	T→A	0.364662	0.635338	ClCG01G009110	intron	snRNA-activating protein complex subunit, putative
	S11_3584374	CG_CHR11:3584374-SNV	CG_Chr11	3584374	9.21e-05	4.03592	1069.87	475.091	0.0421085	0.0316807	Chr CG_Chr11	143	0.905063	C→A	0.143357	0.856643	ClCG11G003430	exon	Arogenate dehydrogenase
	S5_3345919	CG_CHR05:3345919-SNV	CG_Chr05	3345919	0.000102043	3.99122	1355.11	339.715	0.000311915	0.093099	Chr CG_Chr05	143	0.905063	T→A	0.293706	0.706294	ClCG05G003540	exon	Zinc finger family protein
	S7_30313873	CG_CHR07:30313873-SNV	CG_Chr07	30313873	0.00010959	3.96023	2432.56	612.698	0.000519859	0.0923082	Chr CG_Chr07	151	0.955696	T→C	0.122517	0.877483	ClCG07G013820	intron	3-hydroxyisobutyrate dehydrogenase, putative
	S10_27468497	CG_CHR10:27468497-SNV	CG_Chr10	27468497	0.000158033	3.80125	2165.16	559.003	0.000935745	0.0882465	Chr CG_Chr10	146	0.924051	G→T	0.126712	0.873288	ClCG10G013270	exon	Cathepsin B, putative
	S2_4907724	CG_CHR02:4907724-SNV	CG_Chr02	4907724	0.000182248	3.73934	4278.43	1115.63	0.00114369	0.0866624	Chr CG_Chr02	156	0.987342	A→C	0.496795	0.503205	ClCG02G004710,ClCG02G004720	exon	Unknown protein /V-type proton ATPase subunit a
	S1_11538715	CG_CHR01:11538715-SNV	CG_Chr01	11538715	0.000188214	3.72535	-1085.4	387.364	0.0123726	0.0890582	Chr CG_Chr01	133	0.841772	T→C	0.379699	0.620301	ClCG01G009110	intron	snRNA-activating protein complex subunit, putative
	S2_8052455	CG_CHR02:8052455-SNV	CG_Chr02	8052455	0.00023477	3.62936	3639.64	966.352	0.00135163	0.083846	Chr CG_Chr02	157	0.993671	C→T	0.0764331	0.923567	ClCG02G007070	intron	Myosin heavy chain-related protein
	S5_10475613	CG_CHR05:10475613-SNV	CG_Chr05	10475613	0.000311596	3.50641	-1060.53	437.503	0.0306717	0.0832768	Chr CG_Chr05	149	0.943038	G→A	0.14094	0.85906	ClCG05G009520	exon	ferredoxin 1 LENGTH=148
	S10_22825693	CG_CHR10:22825693-SNV	CG_Chr10	22825693	0.000383138	3.41665	2337.57	643.787	0.00176752	0.0783901	Chr CG_Chr10	115	0.727848	G→A	0.0913043	0.908696	ClCG10G010120	exon	alpha/beta-Hydrolases superfamily protein LENGTH=324
	S3_4641573	CG_CHR03:4641573-SNV	CG_Chr03	4641573	0.000401308	3.39652	2481.94	686.002	0.00197546	0.0778735	Chr CG_Chr03	145	0.917722	A→T	0.0758621	0.924138	ClCG03G004290	exon	Ankyrin repeat family protein
	S9_20126304	CG_CHR09:20126304-SNV	CG_Chr09	20126304	0.000441903	3.35467	2713.01	755.54	0.00218341	0.0767988	Chr CG_Chr09	147	0.93038	G→A	0.0748299	0.92517	ClCG09G013500	exon	Transcription factor SPT20 homolog
	S10_27545147	CG_CHR10:27545147-SNV	CG_Chr10	27545147	0.000672695	3.17218	1573.55	453.387	0.00239135	0.0721089	Chr CG_Chr10	150	0.949367	C→T	0.166667	0.833333	ClCG10G013320	exon	GATA transcription factor
	S3_4608488	CG_CHR03:4608488-SNV	CG_Chr03	4608488	0.00079122	3.1017	2704.81	790.088	0.00280724	0.0702965	Chr CG_Chr03	157	0.993671	C→T	0.0732484	0.926752	ClCG03G004260	intron	Potassium transporter 11 family protein
	S3_4032840	CG_CHR03:4032840-SNV	CG_Chr03	4032840	0.00081248	3.09019	-2597.89	760.581	0.00301518	0.0700003	Chr CG_Chr03	153	0.968354	T→A	0.0653595	0.934641	ClCG03G003660	intron	Argininosuccinate synthase
	S3_5298905	CG_CHR03:5298905-SNV	CG_Chr03	5298905	0.000823948	3.0841	-2413.91	707.569	0.00322312	0.0698438	Chr CG_Chr03	136	0.860759	C→T	0.0919118	0.908088	ClCG03G005050	exon	Cysteine-rich receptor-like protein kinase
	S5_24913777	CG_CHR05:24913777-SNV	CG_Chr05	24913777	0.000826898	3.08255	-2465.96	723.049	0.00343107	0.0698038	Chr CG_Chr05	156	0.987342	T→A	0.458333	0.541667	ClCG05G014600	exon	Unknown protein
	S8_19163855	CG_CHR08:19163855-SNV	CG_Chr08	19163855	0.000831462	3.08016	-2876.41	843.798	0.00363901	0.0697424	Chr CG_Chr08	155	0.981013	C→A	0.490323	0.509677	ClCG08G006760	intron	Unknown protein
	S9_5843308	CG_CHR09:5843308-SNV	CG_Chr09	5843308	0.000832416	3.07966	-1393.03	408.686	0.00384695	0.0697295	Chr CG_Chr09	119	0.753165	C→G	0.159664	0.840336	ClCG09G006760	exon	Resistance to phytophthora 1 protein
Asparagine	S1_29419192	CG_CHR01:29419192-SNV	CG_Chr01	29419192	0.000907904	3.04196	-85.193	48.8362	0.0766272	0.0192552	Chr CG_Chr01	138	0.873418	C→A	0.286232	0.713768	ClCG01G015140	exon	SET domain-containing protein
	S5_572234	CG_CHR05:572234-SNV	CG_Chr05	572234	0.000671864	3.17272	-178.363	97.7029	0.0639426	0.0764088	Chr CG_Chr05	154	0.974684	G→T	0.0519481	0.948052	ClCG05G000420	exon	Armadillo repeat-containing protein 5
	S5_3345919	CG_CHR05:3345919-SNV	CG_Chr05	3345919	1.18e-05	4.92937	143.535	49.4158	0.00343107	0.0516215	Chr CG_Chr05	143	0.905063	T→A	0.293706	0.706294	ClCG05G003540	exon	Zinc finger family protein
	S6_28478593	CG_CHR06:28478593-SNV	CG_Chr06	28478593	0.000291188	3.53583	252.926	68.2243	0.000727802	0.0814483	Chr CG_Chr06	116	0.734177	G→A	0.142241	0.857759	ClCG06G015070	exon	Oleosin, putative
	S7_7819769	CG_CHR07:7819769-SNV	CG_Chr07	7819769	0.00055034	3.25937	146.318	41.4682	0.000935745	0.0743501	Chr CG_Chr07	156	0.987342	A→C	0.471154	0.528846	ClCG07G005480	exon	Aspartate semialdehyde dehydrogenase
	S7_32342449	CG_CHR07:32342449-SNV	CG_Chr07	32342449	0.000326776	3.48575	-132.067	46.685	0.00384695	0.049095	Chr CG_Chr07	157	0.993671	C→T	0.417197	0.582803	ClCG07G015910	intron	methyl esterase 11 LENGTH=390
	S8_18984995	CG_CHR08:18984995-SNV	CG_Chr08	18984995	0.000635208	3.19708	-221.807	63.6055	0.00114369	0.0727491	Chr CG_Chr08	150	0.949367	G→T	0.153333	0.846667	ClCG08G006520	exon	Dof zinc finger protein
	S9_14821888	CG_CHR09:14821888-SNV	CG_Chr09	14821888	2.24e-07	6.65013	234.157	90.0684	0.00821377	0.0417834	Chr CG_Chr09	155	0.981013	G→T	0.0612903	0.93871	ClCG09G012520	exon	Vacuolar protein sorting 13
	S10_37000383	CG_CHR10:37000383-SNV	CG_Chr10	37000383	4.67e-09	8.33077	-274.758	71.6873	0.000311915	0.0865684	Chr CG_Chr10	148	0.936709	C→T	0.118243	0.881757	ClCG10G022580	intron	TOM1-like protein 2
	S11_5403367	CG_CHR11:5403367-SNV	CG_Chr11	5403367	6.36e-05	4.19646	196.959	66.0678	0.00259929	0.0542286	Chr CG_Chr11	123	0.778481	C→A	0.219512	0.780488	ClCG11G005030	UTR3	DNA-directed RNA polymerase
	S11_26827363	CG_CHR11:26827363-SNV	CG_Chr11	26827363	1.17e-10	9.93337	383.331	94.498	0.000103972	0.0959736	Chr CG_Chr11	137	0.867089	G→T	0.0547445	0.945255	ClCG11G013620	intron	Aspartate/tyrosine/aromatic aminotransferase
Glutamine	S1_2606384	CG_CHR01:2606384-SNV	CG_Chr01	2606384	0.000765383	3.11612	-72.6899	31.2119	0.0350385	0.0711109	Chr CG_Chr01	146	0.924051	T→G	0.0753425	0.924658	ClCG01G002630	intron	UDP-N-acetylmuramoyl-L-alanyl-D-glutamate--2,6-diaminopimelate ligase
	S1_2606405	CG_CHR01:2606405-SNV	CG_Chr01	2606405	0.000765383	3.11612	-72.6899	31.2119	0.0352464	0.0711109	Chr CG_Chr01	146	0.924051	C→T	0.0753425	0.924658	ClCG01G002630	intron	UDP-N-acetylmuramoyl-L-alanyl-D-glutamate--2,6-diaminopimelate ligase
	S1_11056630	CG_CHR01:11056630-SNV	CG_Chr01	11056630	0.000101236	3.99466	103.87	26.0259	0.000311915	0.0931869	Chr CG_Chr01	141	0.892405	C→A	0.109929	0.890071	ClCG01G008970	intron	ATP-dependent zinc metalloprotease FtsH
	S2_1683683	CG_CHR02:1683683-SNV	CG_Chr02	1683683	0.000182629	3.73843	-125.23	32.6593	0.000519859	0.0866392	Chr CG_Chr02	151	0.955696	G→T	0.122517	0.877483	ClCG02G001590	intron	Pentatricopeptide repeat protein 65
	S2_1683684	CG_CHR02:1683684-SNV	CG_Chr02	1683684	0.000182629	3.73843	-125.23	32.6593	0.000727802	0.0866392	Chr CG_Chr02	151	0.955696	A→T	0.122517	0.877483	ClCG02G001590	intron	Pentatricopeptide repeat protein 65
	S2_1683685	CG_CHR02:1683685-SNV	CG_Chr02	1683685	0.000182629	3.73843	-125.23	32.6593	0.000935745	0.0866392	Chr CG_Chr02	151	0.955696	G→A	0.122517	0.877483	ClCG02G001590	intron	Pentatricopeptide repeat protein 65
	S2_1683686	CG_CHR02:1683686-SNV	CG_Chr02	1683686	0.000182629	3.73843	-125.23	32.6593	0.00114369	0.0866392	Chr CG_Chr02	151	0.955696	G→T	0.122517	0.877483	ClCG02G001590	intron	Pentatricopeptide repeat protein 65
	S2_1683687	CG_CHR02:1683687-SNV	CG_Chr02	1683687	0.000182629	3.73843	-125.23	32.6593	0.00135163	0.0866392	Chr CG_Chr02	151	0.955696	T→G	0.122517	0.877483	ClCG02G001590	intron	Pentatricopeptide repeat protein 65
	S2_9832702	CG_CHR02:9832702-SNV	CG_Chr02	9832702	0.000252637	3.5975	70.3954	18.7906	0.00176752	0.0830297	Chr CG_Chr02	142	0.898734	C→T	0.183099	0.816901	ClCG02G007990	exon	ABC transporter B family member 19
	S4_20140395	CG_CHR04:20140395-SNV	CG_Chr04	20140395	5.8e-05	4.23684	106.477	30.7358	0.00280724	0.0999685	Chr CG_Chr04	143	0.905063	A→G	0.101399	0.898601	ClCG04G005900	exon	Hydroxyproline-rich glycoprotein family protein
	S5_6323530	CG_CHR05:6323530-SNV	CG_Chr05	6323530	0.000188272	3.72521	140.987	36.8475	0.00155958	0.0863009	Chr CG_Chr05	156	0.987342	C→T	0.0512821	0.948718	ClCG05G006350	exon	response regulator 2 LENGTH=664
	S5_36467292	CG_CHR05:36467292-SNV	CG_Chr05	36467292	0.000749826	3.12504	81.8501	23.7997	0.00322312	0.0708967	Chr CG_Chr05	131	0.829114	A→T	0.122137	0.877863	ClCG05G024970	intron	Chromosome undetermined scaffold_69, whole genome shotgun sequence
	S6_28478593	CG_CHR06:28478593-SNV	CG_Chr06	28478593	0.000411368	3.38577	92.9416	25.7384	0.00218341	0.0775974	Chr CG_Chr06	116	0.734177	G→A	0.142241	0.857759	ClCG06G015070	exon	Oleosin, putative
	S8_14197631	CG_CHR08:14197631-SNV	CG_Chr08	14197631	0.000381675	3.41831	69.2699	19.0719	0.00197546	0.0784328	Chr CG_Chr08	119	0.753165	G→C	0.163866	0.836134	ClCG08G004480	intron	Aleurone layer morphogenesis protein
	S8_19163855	CG_CHR08:19163855-SNV	CG_Chr08	19163855	0.000379808	3.42044	-137.406	45.5009	0.00758994	0.078978	Chr CG_Chr08	155	0.981013	C→A	0.490323	0.509677	ClCG08G006760	intron	Unknown protein
	S8_28187355	CG_CHR08:28187355-SNV	CG_Chr08	28187355	0.000733309	3.13471	58.5183	16.9835	0.00301518	0.0711454	Chr CG_Chr08	112	0.708861	C→A	0.334821	0.665179	ClCG08G015690	exon	alpha/beta-Hydrolases superfamily protein LENGTH=314
	S9_667287	CG_CHR09:667287-SNV	CG_Chr09	667287	0.000788703	3.10309	83.2322	24.3059	0.00343107	0.0703321	Chr CG_Chr09	156	0.987342	C→A	0.160256	0.839744	ClCG09G000770	exon	IQ-domain 7 LENGTH=371
	S10_27545147	CG_CHR10:27545147-SNV	CG_Chr10	27545147	0.000529408	3.27621	65.4748	24.6343	0.0171553	0.0752513	Chr CG_Chr10	150	0.949367	C→T	0.166667	0.833333	ClCG10G013320	exon	GATA transcription factor
	S11_3179074	CG_CHR11:3179074-SNV	CG_Chr11	3179074	0.000665994	3.17653	106.952	30.7903	0.00259929	0.0722207	Chr CG_Chr11	157	0.993671	A→C	0.0923567	0.907643	ClCG11G003010/ClCG11G003020	exon	Nuclear pore complex protein Nup205/Pectin lyase-like superfamily protein LENGTH=444
Serine	S6_28218401	CG_CHR06:28218401-SNV	CG_Chr06	28218401	8.05e-06	5.09397	447.986	97.0913	0.000103972	0.120765	Chr CG_Chr06	123	0.778481	G→C	0.0772358	0.922764	ClCG06G014770	intron	Synaptotagmin, putative
	S11_5403367	CG_CHR11:5403367-SNV	CG_Chr11	5403367	8.69e-05	4.06074	324.413	80.4858	0.000311915	0.0948719	Chr CG_Chr11	123	0.778481	C→A	0.219512	0.780488	ClCG11G005030	UTR3	DNA-directed RNA polymerase
	S2_27926718	CG_CHR02:27926718-SNV	CG_Chr02	27926718	0.000290713	3.53654	-204.134	55.0563	0.000519859	0.0814665	Chr CG_Chr02	155	0.981013	C→T	0.354839	0.645161	ClCG02G013820	exon	AP2-like ethylene-responsive transcription factor
	S9_31937559	CG_CHR09:31937559-SNV	CG_Chr09	31937559	0.000553234	3.25709	304.111	86.225	0.000727802	0.0742916	Chr CG_Chr09	133	0.841772	C→A	0.0977444	0.902256	ClCG09G016240	exon	GMP synthase [glutamine-hydrolyzing]
	S1_29291770	CG_CHR01:29291770-SNV	CG_Chr01	29291770	0.000851804	3.06966	318.274	93.5608	0.00114369	0.0694724	Chr CG_Chr01	137	0.867089	C→G	0.0766423	0.923358	ClCG01G014980	intron	Exocyst subunit exo70-A2
	S10_33974439	CG_CHR10:33974439-SNV-2	CG_Chr10	33974439	0.000969853	3.01329	373.669	118.894	0.00259929	0.06845	Chr CG_Chr10	147	0.93038	G→A	0.0510204	0.94898	ClCG10G019030	exon	Abscisic acid insensitive
Glutamic Acid	S1_820497	CG_CHR01:820497-SNV	CG_Chr01	820497	0.000960713	3.01741	-827.539	245.831	0.00155958	0.0681282	Chr CG_Chr01	150	0.949367	C→T	0.196667	0.803333	ClCG01G000930	intron	Site-determining protein
	S1_11056630	CG_CHR01:11056630-SNV	CG_Chr01	11056630	2.24e-05	4.65022	755.801	309.391	0.0208983	0.0370732	Chr CG_Chr01	141	0.892405	C→A	0.109929	0.890071	ClCG01G008970	intron	ATP-dependent zinc metalloprotease FtsH
	S2_1179369	CG_CHR02:1179369-SNV	CG_Chr02	1179369	0.000620125	3.20752	-379.91	201.068	0.0631108	0.0778684	Chr CG_Chr02	151	0.955696	C→T	0.271523	0.728477	ClCG02G001000	UTR5	Unknown protein
	S2_7404546	CG_CHR02:7404546-SNV	CG_Chr02	7404546	1.39e-06	5.85573	-709.277	271.031	0.0125806	0.0423142	Chr CG_Chr02	155	0.981013	C→A	0.303226	0.696774	ClCG02G006450	exon	Plant basic secretory family protein
	S4_26143536	CG_CHR04:26143536-SNV	CG_Chr04	26143536	1.13e-08	7.94581	-1009.08	270.583	0.000935745	0.0823381	Chr CG_Chr04	153	0.968354	A→T	0.163399	0.836601	ClCG04G011160	UTR3	Unknown protein
	S5_160148	CG_CHR05:160148-SNV	CG_Chr05	160148	0.000246976	3.60735	-1277.85	340.532	0.000727802	0.0832819	Chr CG_Chr05	152	0.962025	T→G	0.0723684	0.927632	ClCG05G000110	UTR3	Unknown protein
	S5_32012491	CG_CHR05:32012491-SNV	CG_Chr05	32012491	0.000305863	3.51447	-491.658	279.082	0.084529	0.01963	Chr CG_Chr05	155	0.981013	G→A	0.187097	0.812903	ClCG05G019760	exon	Dihydroflavonol-4-reductase
	S5_37505415	CG_CHR05:37505415-SNV	CG_Chr05	37505415	7.35e-06	5.13344	-1034.23	335.181	0.00322312	0.0578698	Chr CG_Chr05	145	0.917722	G→A	0.0931034	0.906897	ClCG05G026250	exon	Signal recognition particle subunit SRP72
	S9_11006232	CG_CHR09:11006232-SNV	CG_Chr09	11006232	0.000803862	3.09482	-995.639	347.736	0.00655022	0.0747857	Chr CG_Chr09	135	0.85443	C→A	0.0962963	0.903704	ClCG09G011150	exon	MBOAT (membrane bound O-acyl transferase) family protein LENGTH=342
	S10_25731197	CG_CHR10:25731197-SNV	CG_Chr10	25731197	2.53e-06	5.59666	991.67	218.701	0.000103972	0.117113	Chr CG_Chr10	153	0.968354	G→T	0.212418	0.787582	ClCG10G011840	exon	Protein kinase superfamily protein LENGTH=361
	S10_37000383	CG_CHR10:37000383-SNV	CG_Chr10	37000383	0.000201729	3.69523	-1185.68	311.399	0.000519859	0.0855333	Chr CG_Chr10	148	0.936709	C→T	0.118243	0.881757	ClCG10G022580	intron	TOM1-like protein 2
	S11_30966333	CG_CHR11:30966333-SNV	CG_Chr11	30966333	0.000120062	3.92059	691.746	330.219	0.0396132	0.0275317	Chr CG_Chr11	149	0.943038	C→A	0.0872483	0.912752	ClCG11G017780	exon	Tyrosine aminotransferase, putative
Aspartic Acid	S2_27350028	CG_CHR02:27350028-SNV	CG_Chr02	27350028	0.000177827	3.75	475.916	128.936	0.000311915	0.0874761	Chr CG_Chr02	150	0.949367	T→G	0.0866667	0.913333	ClCG02G013430	exon	Geranylgeranyl diphosphate synthase
	S4_23201808	CG_CHR04:23201808-SNV	CG_Chr04	23201808	1.29136e-06	5.88895	635.942	174.891	0.000519859	0.101361	Chr CG_Chr04	156	0.987342	C→A	0.0512821	0.948718	ClCG04G008260	exon	Ankyrin repeat domain-containing protein 28
	S8_17989033	CG_CHR08:17989033-SNV	CG_Chr08	17989033	7.57816e-07	6.96256	343.352	96.8229	0.000727802	0.0898681	Chr CG_Chr08	140	0.886076	T→A	0.214286	0.785714	ClCG08G005850	intron	40S ribosomal protein S8
	S10_28177172	CG_CHR10:28177172-SNV	CG_Chr10	28177172	0.000758965	3.11978	352.481	102.597	0.00135163	0.0707614	Chr CG_Chr10	150	0.949367	A→C	0.383333	0.616667	ClCG10G013890	exon	F-box/LRR-repeat protein, putative
	S5_31962900	CG_CHR05:31962900-SNV	CG_Chr05	31962900	0.000910918	3.04052	-259.745	76.8017	0.00176752	0.0687228	Chr CG_Chr05	131	0.829114	A→G	0.301527	0.698473	ClCG05G019720	intron	Heme oxygenase 2
	S5_31962901	CG_CHR05:31962901-SNV	CG_Chr05	31962901	0.000910918	3.04052	-259.745	76.8017	0.00197546	0.0687228	Chr CG_Chr05	131	0.829114	A→G	0.301527	0.698473	ClCG05G019720	intron	Heme oxygenase 2
Citrulline	S8_18898330	CG_CHR08:18898330-SNV	CG_Chr08	18898330	4.67e-08	7.33078	-1026.79	217.449	0.000727802	0.12576	Chr CG_Chr08	158	1	A→G	0.462025	0.537975	ClCG08G006440	exon	Acyl-[acyl-carrier-protein] desaturase
	S5_27694597	CG_CHR05:27694597-SNV	CG_Chr05	27694597	6.15e-07	6.21084	705.197	141.202	0.000103972	0.138613	Chr CG_Chr05	144	0.911392	A→G	0.0902778	0.909722	ClCG05G015780	intron	Leucine-rich receptor-like protein kinase family protein LENGTH=976
	S5_6383616	CG_CHR05:6383616-SNV	CG_Chr05	6383616	1.83e-06	5.73854	668.903	134.831	0.000311915	0.137028	Chr CG_Chr05	133	0.841772	G→A	0.0827068	0.917293	ClCG05G006400	exon	Unknown protein
	S10_534411	CG_CHR10:534411-SNV	CG_Chr10	534411	2.92e-06	5.53452	818.497	176.261	0.00135163	0.12213	Chr CG_Chr10	156	0.987342	A→C	0.0544872	0.945513	ClCG10G000460	exon	DNA-directed RNA polymerase
	S6_1506000	CG_CHR06:1506000-SNV	CG_Chr06	1506000	5.38e-06	5.26919	793.758	259.193	0.00675816	0.0570537	Chr CG_Chr06	155	0.981013	T→C	0.496774	0.503226	ClCG06G001450	exon	Pre-mRNA-processing factor 39
	S10_27545147	CG_CHR10:27545147-SNV	CG_Chr10	27545147	6.78e-06	5.16864	527.66	113.245	0.000935745	0.122858	Chr CG_Chr10	150	0.949367	C→T	0.166667	0.833333	ClCG10G013320	exon	GATA transcription factor
	S8_23932593	CG_CHR08:23932593-SNV	CG_Chr08	23932593	6.86e-06	5.16391	564.114	121.136	0.00114369	0.12274	Chr CG_Chr08	130	0.822785	T→C	0.119231	0.880769	ClCG08G011200	exon	Serine/threonine protein phosphatase 2A activator
	S6_6090864	CG_CHR06:6090864-SNV	CG_Chr06	6090864	1.52e-05	4.81878	675.291	151.154	0.00155958	0.11408	Chr CG_Chr06	141	0.892405	A→G	0.0567376	0.943262	ClCG06G005380	intron	Lipase
	S5_27691992	CG_CHR05:27691992-SNV	CG_Chr05	27691992	3.4e-05	4.46901	570.75	133.668	0.00176752	0.105247	Chr CG_Chr05	143	0.905063	C→G	0.101399	0.898601	ClCG05G015780	intron	Leucine-rich receptor-like protein kinase family protein LENGTH=976
	S10_22825693	CG_CHR10:22825693-SNV	CG_Chr10	22825693	4.23e-05	4.37388	687.855	163.191	0.00197546	0.102835	Chr CG_Chr10	115	0.727848	G→A	0.0913043	0.908696	ClCG10G010120	exon	alpha/beta-Hydrolases superfamily protein LENGTH=324
	S5_3345919	CG_CHR05:3345919-SNV	CG_Chr05	3345919	6.42e-05	4.19244	340.059	87.4841	0.00218341	0.0994475	Chr CG_Chr05	143	0.905063	T→A	0.293706	0.706294	ClCG05G003540	exon	Zinc finger family protein
	S2_34574812	CG_CHR02:34574812-SNV	CG_Chr02	34574812	0.000139953	3.85402	-759.863	203.085	0.00239135	0.0907154	Chr CG_Chr02	155	0.981013	T→C	0.490323	0.509677	ClCG02G019940	exon	Pentatricopeptide repeat-containing protein, putative
	S8_17989034	CG_CHR08:17989034-SNV	CG_Chr08	17989034	0.000146154	3.83519	473.719	166.879	0.011125	0.0902285	Chr CG_Chr08	140	0.886076	T→A	0.075	0.925	ClCG08G005850	intron	40S ribosomal protein S8
	S1_31729636	CG_CHR01:31729636-SNV	CG_Chr01	31729636	0.000336936	3.47245	407.375	111.097	0.00280724	0.0798225	Chr CG_Chr01	157	0.993671	C→A	0.117834	0.882166	ClCG01G017180	exon	Auxin-responsive GH3 family protein
	S11_4636578	CG_CHR11:4636578-SNV	CG_Chr11	4636578	0.000366366	3.43608	411.816	113.028	0.00301518	0.0788891	Chr CG_Chr11	121	0.765823	G→A	0.152893	0.847107	ClCG11G004350	intron	Glutamine--tRNA ligase
	S11_4636582	CG_CHR11:4636582-SNV	CG_Chr11	4636582	0.000366366	3.43608	411.816	113.028	0.00322312	0.0788891	Chr CG_Chr11	121	0.765823	G→A	0.152893	0.847107	ClCG11G004350	intron	Glutamine--tRNA ligase
	S11_4636583	CG_CHR11:4636583-SNV	CG_Chr11	4636583	0.000366366	3.43608	411.816	113.028	0.00343107	0.0788891	Chr CG_Chr11	121	0.765823	C→T	0.152893	0.847107	ClCG11G004350	intron	Glutamine--tRNA ligase
	S8_28748472	CG_CHR08:28748472-SNV	CG_Chr08	28748472	0.000448106	3.34862	168.154	164.315	0.323872	0.0109657	Chr CG_Chr08	156	0.987342	T→G	0.435897	0.564103	ClCG08G016390	exon	Family of unknown function (DUF566) LENGTH=659
	S10_3691711	CG_CHR10:3691711-SNV	CG_Chr10	3691711	0.000499505	3.30146	-449.795	150.047	0.0088376	0.0547985	Chr CG_Chr10	154	0.974684	G→C	0.415584	0.584416	ClCG10G002960	exon	Glycine-rich protein
	S6_13968526	CG_CHR06:13968526-SNV	CG_Chr06	13968526	0.000532958	3.27331	37.992	82.5654	0.663028	0.0776065	Chr CG_Chr06	148	0.936709	T→C	0.5	0.5	ClCG06G009040	intron	Cell division cycle, putative
	S6_13968528	CG_CHR06:13968528-SNV	CG_Chr06	13968528	0.000532958	3.27331	37.992	82.5654	0.663236	0.0776065	Chr CG_Chr06	148	0.936709	G→A	0.5	0.5	ClCG06G009040	intron	Cell division cycle, putative
	S4_27032997	CG_CHR04:27032997-SNV	CG_Chr04	27032997	0.000564444	3.24838	396.192	112.516	0.00363901	0.0740677	Chr CG_Chr04	147	0.93038	A→G	0.129252	0.870748	ClCG04G012090	exon	Pseudo response regulator
	S4_24758308	CG_CHR04:24758308-SNV	CG_Chr04	24758308	0.000598989	3.22258	221.809	97.7991	0.0323352	0.0743305	Chr CG_Chr04	136	0.860759	T→C	0.205882	0.794118	ClCG04G009780	intron	Protein kinase superfamily protein LENGTH=821
	S10_25321132	CG_CHR10:25321132-SNV	CG_Chr10	25321132	0.000672019	3.17262	493.903	142.296	0.00384695	0.0721201	Chr CG_Chr10	154	0.974684	G→T	0.0974026	0.902597	ClCG10G011580	exon	CUGBP Elav-like family member 1
	S2_28085040	CG_CHR02:28085040-SNV	CG_Chr02	28085040	0.000673067	3.17194	243.598	92.1572	0.0156997	0.0730129	Chr CG_Chr02	157	0.993671	C→T	0.372611	0.627389	ClCG02G013930	exon	Elongation defective 1 family protein
	S2_8052455	CG_CHR02:8052455-SNV	CG_Chr02	8052455	0.000680066	3.16745	867.452	250.166	0.0040549	0.0719872	Chr CG_Chr02	157	0.993671	C→T	0.0764331	0.923567	ClCG02G007070	intron	Myosin heavy chain-related protein
	S11_1088968	CG_CHR11:1088968-SNV-2	CG_Chr11	1088968	0.000883798	3.05365	295.444	87.1277	0.00426284	0.0690605	Chr CG_Chr11	125	0.791139	T→A	0.28	0.72	ClCG11G000820	intron	Tobamovirus multiplication 1 homolog
	S6_29048764	CG_CHR06:29048764-SNV	CG_Chr06	29048764	0.000886888	3.05213	419.993	123.895	0.00447078	0.0690215	Chr CG_Chr06	141	0.892405	G→T	0.120567	0.879433	ClCG06G015710	exon	Chaperone clpb, putative
	S4_22250056	CG_CHR04:22250056-SNV	CG_Chr04	22250056	0.000948544	3.02294	-275.256	184.52	0.149823	0.0709287	Chr CG_Chr04	155	0.981013	C→A	0.0548387	0.945161	ClCG04G007270	exon	mRNA-capping enzyme
	S1_30140573	CG_CHR01:30140573-SNV	CG_Chr01	30140573	0.000981738	3.008	-104.244	71.8148	0.158973	0.0705301	Chr CG_Chr01	115	0.727848	G→A	0.447826	0.552174	ClCG01G015840	exon	Unknown protein
Threonine	S5_5365174	CG_CHR05:5365174-SNV	CG_Chr05	5365174	0.00063903	3.19448	94.6918	27.1673	0.000311915	0.0726822	Chr CG_Chr05	157	0.993671	A→G	0.130573	0.869427	ClCG05G005480	intron	Endo-1,3-1,4-beta-d-glucanase, putative
	S10_37000383	CG_CHR10:37000383-SNV	CG_Chr10	37000383	0.000670405	3.17366	-127.905	36.8428	0.000519859	0.072147	Chr CG_Chr10	148	0.936709	C→T	0.118243	0.881757	ClCG10G022580	intron	TOM1-like protein 2
	S1_13388733	CG_CHR01:13388733-SNV	CG_Chr01	13388733	0.000869524	3.06072	91.0451	26.8116	0.000935745	0.0692424	Chr CG_Chr01	156	0.987342	C→T	0.192308	0.807692	ClCG01G009550	exon	60 kDa chaperonin
Glycine	S11_5403367	CG_CHR11:5403367-SNV	CG_Chr11	5403367	2.67e-07	6.57289	294.393	72.9289	0.000103972	0.0951287	Chr CG_Chr11	123	0.778481	C→A	0.219512	0.780488	ClCG11G005030	UTR3	DNA-directed RNA polymerase
	S10_37000383	CG_CHR10:37000383-SNV	CG_Chr10	37000383	6.3e-07	6.20079	-265.211	81.9232	0.00114369	0.0633319	Chr CG_Chr10	148	0.936709	C→T	0.118243	0.881757	ClCG10G022580	intron	TOM1-like protein 2
	S2_9832702	CG_CHR02:9832702-SNV	CG_Chr02	9832702	2.69e-05	4.5707	214.657	56.246	0.000311915	0.0858952	Chr CG_Chr02	142	0.898734	C→T	0.183099	0.816901	ClCG02G007990	exon	ABC transporter B family member 19
	S8_18898330	CG_CHR08:18898330-SNV	CG_Chr08	18898330	7.1e-05	4.14882	-387.095	141.946	0.00634227	0.0457828	Chr CG_Chr08	158	1	A→G	0.462025	0.537975	ClCG08G006440	exon	Acyl-[acyl-carrier-protein] desaturase
	S5_6828913	CG_CHR05:6828913-SNV	CG_Chr05	6828913	0.000121038	3.91708	164.925	57.8245	0.00447078	0.0498656	Chr CG_Chr05	136	0.860759	A→G	0.246324	0.753676	ClCG05G006760	intron	Beta 1, 3 galactosyltransferase
	S8_28434785	CG_CHR08:28434785-SNV	CG_Chr08	28434785	0.000129083	3.88913	-275.123	82.0702	0.000935745	0.0933732	Chr CG_Chr08	157	0.993671	G→T	0.414013	0.585987	ClCG08G016000	exon	abscisic acid responsive elements-binding factor 2 LENGTH=427
	S4_26850326	CG_CHR04:26850326-SNV	CG_Chr04	26850326	0.000283033	3.54816	175.83	63.6918	0.00571844	0.0843804	Chr CG_Chr04	113	0.71519	A→G	0.163717	0.836283	ClCG04G011860	exon	Transmembrane protein adipocyte-associated 1 homolog
	S9_22334818	CG_CHR09:22334818-SNV	CG_Chr09	22334818	0.000641397	3.19287	183.823	52.7555	0.000519859	0.0726409	Chr CG_Chr09	130	0.822785	T→G	0.334615	0.665385	ClCG09G013930	intron	Genomic DNA, chromosome 3, P1 clone: MYF24
	S5_24913777	CG_CHR05:24913777-SNV	CG_Chr05	24913777	0.000702514	3.15335	-400.601	115.845	0.000727802	0.0716246	Chr CG_Chr05	156	0.987342	T→A	0.458333	0.541667	ClCG05G014600	exon	Unknown protein
	S2_34483984	CG_CHR02:34483984-SNV	CG_Chr02	34483984	0.000826685	3.08266	-65.4288	50.9263	0.161884	0.0720551	Chr CG_Chr02	111	0.702532	G→A	0.265766	0.734234	ClCG02G019800	intron	Neutral ceramidase
Alanine	S11_26827363	CG_CHR11:26827363-SNV	CG_Chr11	26827363	1.57e-05	4.80336	1428.8	373.564	0.000103972	0.0862404	Chr CG_Chr11	137	0.867089	G→T	0.0547445	0.945255	ClCG11G013620	intron	Aspartate/tyrosine/aromatic aminotransferase
	S8_18984995	CG_CHR08:18984995-SNV	CG_Chr08	18984995	2.72e-05	4.56618	-885.601	249.793	0.000519859	0.0750101	Chr CG_Chr08	150	0.949367	G→T	0.153333	0.846667	ClCG08G006520	exon	Dof zinc finger protein
	S5_24913777	CG_CHR05:24913777-SNV	CG_Chr05	24913777	0.000552686	3.25752	-1137.38	408.828	0.00530256	0.0475592	Chr CG_Chr05	156	0.987342	T→A	0.458333	0.541667	ClCG05G014600	exon	Unknown protein
	S3_3554205	CG_CHR03:3554205-SNV-2	CG_Chr03	3554205	0.000759663	3.11938	890.984	335.313	0.00717405	0.0721003	Chr CG_Chr03	144	0.911392	G→T	0.0625	0.9375	ClCG03G003030	exon	Kinase family protein
	S4_26850326	CG_CHR04:26850326-SNV	CG_Chr04	26850326	0.000925625	3.03356	546.243	223.033	0.0123726	0.0698526	Chr CG_Chr04	113	0.71519	A→G	0.163717	0.836283	ClCG04G011860	exon	Transmembrane protein adipocyte-associated 1 homolog
GABA	S5_24913777	CG_CHR05:24913777-SNV	CG_Chr05	24913777	1.66e-10	9.77919	-1266.91	278.321	0.000103972	0.117917	Chr CG_Chr05	156	0.987342	T→A	0.458333	0.541667	ClCG05G014600	exon	Unknown protein
	S1_38357625	CG_CHR01:38357625-SNV	CG_Chr01	38357625	4.31e-09	8.36513	487.866	143.473	0.000935745	0.0694197	Chr CG_Chr01	157	0.993671	G→A	0.245223	0.754777	ClCG01G025290	intron	FATTY ACID HYDROXYLASE 1 family protein
	S3_30778607	CG_CHR03:30778607-SNV	CG_Chr03	30778607	1.68e-07	6.77574	499.155	158.549	0.00259929	0.0601024	Chr CG_Chr03	148	0.936709	T→G	0.344595	0.655405	ClCG03G015820	UTR3	Xaa-pro dipeptidase, putative
	S2_9832702	CG_CHR02:9832702-SNV	CG_Chr02	9832702	4.26e-06	5.37049	537.697	138.42	0.000519859	0.0127759	Chr CG_Chr02	142	0.898734	C→T	0.183099	0.816901	ClCG02G007990	exon	ABC transporter B family member 19
	S10_5919054	CG_CHR10:5919054-SNV-2	CG_Chr10	5919054	4.99e-06	5.3016	358.123	148.718	0.0169474	0.0125398	Chr CG_Chr10	125	0.791139	G→C	0.204	0.796	ClCG10G004680	exon	Unknown protein
	S3_24295588	CG_CHR03:24295588-SNV	CG_Chr03	24295588	4.04e-05	4.3934	675.523	273.748	0.0138282	0.0378017	Chr CG_Chr03	143	0.905063	A→C	0.0594406	0.940559	ClCG03G012130	exon	Aluminum-activated malate transporter
	S5_6406601	CG_CHR05:6406601-SNV-2	CG_Chr05	6406601	0.000139072	3.85676	1047.94	268.2	0.000311915	0.0896656	Chr CG_Chr05	155	0.981013	G→T	0.0580645	0.941935	ClCG05G006410	intron	Pentatricopeptide repeat-containing protein, putative
	S6_30265711	CG_CHR06:30265711-SNV	CG_Chr06	30265711	0.000535154	3.27152	-318.627	198.348	0.0922229	0.0163761	Chr CG_Chr06	128	0.810127	T→C	0.234375	0.765625	ClCG06G017080	intron	Homeobox transcription factor KN3
	S6_30265763	CG_CHR06:30265763-SNV	CG_Chr06	30265763	0.000535154	3.27152	-318.627	198.348	0.0924309	0.0163761	Chr CG_Chr06	128	0.810127	A→T	0.234375	0.765625	ClCG06G017080	intron	Homeobox transcription factor KN3
	S6_30490437	CG_CHR06:30490437-SNV	CG_Chr06	30490437	0.000614142	3.21173	-412.923	198.602	0.0344146	0.0446251	Chr CG_Chr06	137	0.867089	C→G	0.20073	0.79927	ClCG06G017290	exon	Histone deacetylase
	S11_1683782	CG_CHR11:1683782-SNV	CG_Chr11	1683782	0.000777263	3.10943	476.873	139.086	0.000727802	0.0704953	Chr CG_Chr11	112	0.708861	T→C	0.236607	0.763393	ClCG11G001440	exon	O-fucosyltransferase family protein LENGTH=652
	S10_6086489	CG_CHR10:6086489-SNV	CG_Chr10	6086489	0.000788847	3.10301	-182.033	192.782	0.301622	0.00571934	Chr CG_Chr10	149	0.943038	A→C	0.432886	0.567114	ClCG10G004930	exon	Cell division protein FtsZ
	S10_25205417	CG_CHR10:25205417-SNV	CG_Chr10	25205417	0.000880258	3.05539	-168.683	107.043	0.0978374	0.0157686	Chr CG_Chr10	133	0.841772	T→C	0.488722	0.511278	ClCG10G011520	exon	ATP-dependent RNA helicase, putative
	S3_1518758	CG_CHR03:1518758-SNV	CG_Chr03	1518758	0.000941713	3.02608	577.164	171.154	0.00114369	0.0683514	Chr CG_Chr03	135	0.85443	A→T	0.140741	0.859259	ClCG03G001550	UTR3	Unknown protein
Proline	S3_1518758	CG_CHR03:1518758-SNV	CG_Chr03	1518758	8.73e-09	8.05907	312.952	74.963	0.000311915	0.101077	Chr CG_Chr03	135	0.85443	A→T	0.140741	0.859259	ClCG03G001550	UTR3	Unknown protein
	S8_28434785	CG_CHR08:28434785-SNV	CG_Chr08	28434785	6.81e-08	7.16674	-407.678	87.5514	0.000103972	0.12272	Chr CG_Chr08	157	0.993671	G→T	0.414013	0.585987	ClCG08G016000	exon	abscisic acid responsive elements-binding factor 2 LENGTH=427
	S2_9832702	CG_CHR02:9832702-SNV	CG_Chr02	9832702	0.000156597	3.80522	239.407	61.7715	0.000727802	0.0883478	Chr CG_Chr02	142	0.898734	C→T	0.183099	0.816901	ClCG02G007990	exon	ABC transporter B family member 19
	S3_1511057	CG_CHR03:1511057-SNV	CG_Chr03	1511057	0.000194623	3.71081	52.5827	74.5337	0.40601	0.0870085	Chr CG_Chr03	154	0.974684	A→G	0.152597	0.847403	ClCG03G001530	exon	RING finger protein
	S9_7084058	CG_CHR09:7084058-SNV	CG_Chr09	7084058	0.000230903	3.63657	435.428	115.471	0.000935745	0.0840308	Chr CG_Chr09	146	0.924051	C→A	0.0616438	0.938356	ClCG09G007780	exon	Pre-mRNA splicing factor ATP-dependent RNA helicase-like protein
	S10_29132079	CG_CHR10:29132079-SNV	CG_Chr10	29132079	0.000245031	3.61078	-408.323	108.75	0.00114369	0.0833699	Chr CG_Chr10	155	0.981013	T→G	0.432258	0.567742	ClCG10G014720	exon	Thaumatin-like protein
	S7_30226049	CG_CHR07:30226049-SNV	CG_Chr07	30226049	0.00044028	3.35627	262.439	80.1353	0.00280724	0.0778072	Chr CG_Chr07	140	0.886076	C→T	0.146429	0.853571	ClCG07G013760	intron	Mediator of RNA polymerase II transcription subunit 9
	S8_25465256	CG_CHR08:25465256-SNV	CG_Chr08	25465256	0.000609651	3.21492	-395.1	112.916	0.00176752	0.0732076	Chr CG_Chr08	157	0.993671	G→T	0.442675	0.557325	ClCG08G012560	exon	Protein kinase
	S3_1518753	CG_CHR03:1518753-SNV	CG_Chr03	1518753	0.000931307	3.03091	200.543	59.4115	0.00218341	0.0684755	Chr CG_Chr03	135	0.85443	A→G	0.325926	0.674074	ClCG03G001550	UTR3	Unknown protein
	S10_28077032	CG_CHR10:28077032-SNV-2	CG_Chr10	28077032	0.00093825	3.02768	410.755	121.767	0.00239135	0.0683925	Chr CG_Chr10	156	0.987342	T→A	0.0641026	0.935897	ClCG10G013790	exon	Protein kinase
	S11_30413909	CG_CHR11:30413909-SNV	CG_Chr11	30413909	0.000967824	3.0142	-344.357	108.11	0.00426284	0.0689067	Chr CG_Chr11	157	0.993671	A→G	0.423567	0.576433	ClCG11G017130	intron	Myosin-like protein
	S2_1720055	CG_CHR02:1720055-SNV	CG_Chr02	1720055	0.000992906	3.00309	179.199	57.6363	0.00509461	0.0690543	Chr CG_Chr02	136	0.860759	T→C	0.283088	0.716912	ClCG02G001700	exon	Pentatricopeptide repeat-containing protein
L-Ornithine	S11_26827363	CG_CHR11:26827363-SNV	CG_Chr11	26827363	5.32e-06	5.2737	85.3232	21.7524	0.000103972	0.0902998	Chr CG_Chr11	137	0.867089	G→T	0.0547445	0.945255	ClCG11G013620	intron	Aspartate/tyrosine/aromatic aminotransferase
	S5_3345919	CG_CHR05:3345919-SNV	CG_Chr05	3345919	4.36e-05	4.36042	37.2913	11.2557	0.00218341	0.0661344	Chr CG_Chr05	143	0.905063	T→A	0.293706	0.706294	ClCG05G003540	exon	Zinc finger family protein
	S5_27691992	CG_CHR05:27691992-SNV	CG_Chr05	27691992	0.000249298	3.60328	51.0674	17.4933	0.00488667	0.0842213	Chr CG_Chr05	143	0.905063	C→G	0.101399	0.898601	ClCG05G015780	intron	Leucine-rich receptor-like protein kinase family protein LENGTH=976
	S6_30328516	CG_CHR06:30328516-SNV	CG_Chr06	30328516	0.000269184	3.56995	-57.837	17.2226	0.00176752	0.0833567	Chr CG_Chr06	152	0.962025	G→A	0.207237	0.792763	ClCG06G017130	exon	modifier of snc1 LENGTH=1427
	S6_30328531	CG_CHR06:30328531-SNV	CG_Chr06	30328531	0.000269184	3.56995	-57.837	17.2226	0.00197546	0.0833567	Chr CG_Chr06	152	0.962025	G→T	0.207237	0.792763	ClCG06G017130	exon	modifier of snc1 LENGTH=1427
	S5_27694597	CG_CHR05:27694597-SNV	CG_Chr05	27694597	0.000311489	3.50656	68.4189	18.5485	0.000311915	0.0806976	Chr CG_Chr05	144	0.911392	A→G	0.0902778	0.909722	ClCG05G015780	intron	Leucine-rich receptor-like protein kinase family protein LENGTH=976
	S8_23932593	CG_CHR08:23932593-SNV	CG_Chr08	23932593	0.000410224	3.38698	56.9826	15.7768	0.000519859	0.0776284	Chr CG_Chr08	130	0.822785	T→C	0.119231	0.880769	ClCG08G011200	exon	GMP synthase [glutamine-hydrolyzing]
	S8_18898330	CG_CHR08:18898330-SNV	CG_Chr08	18898330	0.000452672	3.34422	-101.788	28.4006	0.000727802	0.0765302	Chr CG_Chr08	158	1	A→G	0.462025	0.537975	ClCG08G006440	exon	Acyl-[acyl-carrier-protein] desaturase
	S6_28478593	CG_CHR06:28478593-SNV	CG_Chr06	28478593	0.000570798	3.24352	55.2804	15.7136	0.000935745	0.0739427	Chr CG_Chr06	116	0.734177	G→A	0.142241	0.857759	ClCG06G015070	exon	Oleosin, putative
	S5_24913777	CG_CHR05:24913777-SNV	CG_Chr05	24913777	0.000602835	3.2198	-71.4444	23.7471	0.0040549	0.0742582	Chr CG_Chr05	156	0.987342	T→A	0.458333	0.541667	ClCG05G014600	exon	Unknown protein
	S5_5365174	CG_CHR05:5365174-SNV	CG_Chr05	5365174	0.000826516	3.08275	41.7597	12.244	0.00114369	0.069809	Chr CG_Chr05	157	0.993671	A→G	0.130573	0.869427	ClCG05G005480	intron	Endo-1,3-1,4-beta-d-glucanase, putative
	S2_27350035	CG_CHR02:27350035-SNV	CG_Chr02	27350035	0.000880163	3.05544	-44.3385	13.0709	0.00135163	0.0691065	Chr CG_Chr02	150	0.949367	G→C	0.213333	0.786667	ClCG02G013430	exon	Geranylgeranyl diphosphate synthase
	S5_6383616	CG_CHR05:6383616-SNV	CG_Chr05	6383616	0.000889779	3.05072	60.2889	17.7898	0.00155958	0.0689851	Chr CG_Chr05	133	0.841772	G→A	0.0827068	0.917293	ClCG05G006400	exon	Unknown protein
Cystine	S3_1518758	CG_CHR03:1518758-SNV	CG_Chr03	1518758	4.96e-07	6.30467	2.28424	0.577303	0.000311915	0.0922795	Chr CG_Chr03	135	0.85443	A→T	0.140741	0.859259	ClCG03G001550	UTR3	Unknown protein
	S11_7365299	CG_CHR11:7365299-SNV	CG_Chr11	7365299	1.14e-06	5.94456	4.06211	0.801665	0.000103972	?	Cofactor	150	0.949367	C→T	0.0733333	0.926667	ClCG11G006720	exon	AT hook motif DNA-binding family protein LENGTH=354
	S3_7183629	CG_CHR03:7183629-SNV	CG_Chr03	7183629	2.52e-06	5.59943	-1.36691	0.426728	0.000935745	0.0624659	Chr CG_Chr03	154	0.974684	C→T	0.340909	0.659091	ClCG03G006480	exon	Auxin response factor 4
	S8_21705555	CG_CHR08:21705555-SNV	CG_Chr08	21705555	3.05e-05	4.51639	3.7326	0.978391	0.000519859	0.086349	Chr CG_Chr08	157	0.993671	G→A	0.0541401	0.94586	ClCG08G009120	UTR3	Protein FAM135B
	S10_4645314	CG_CHR10:4645314-SNV	CG_Chr10	4645314	5.49e-05	4.26063	-1.55277	0.695678	0.0179871	0.0313365	Chr CG_Chr10	143	0.905063	G→A	0.125874	0.874126	ClCG10G003710	exon	Ethylene-responsive transcription factor 1
	S1_9060256	CG_CHR01:9060256-SNV	CG_Chr01	9060256	0.000144512	3.8401	0.99266	0.41054	0.00966937	0.0365752	Chr CG_Chr01	148	0.936709	A→C	0.293919	0.706081	ClCG01G007910	exon	Ethylene-responsive transcription factor, putative
	S5_2608730	CG_CHR05:2608730-SNV	CG_Chr05	2608730	0.000942943	3.02551	2.092	0.764381	0.00363901	0.0709974	Chr CG_Chr05	157	0.993671	T→G	0.0923567	0.907643	ClCG05G002750	exon	Multidrug resistance protein ABC transporter family
	S8_21448430	CG_CHR08:21448430-SNV	CG_Chr08	21448430	0.000977383	3.00994	1.68821	0.652043	0.00571844	0.0705816	Chr CG_Chr08	156	0.987342	G→T	0.13141	0.86859	ClCG08G008910	intron	DNA-binding protein-like
Lysine	S2_9832702	CG_CHR02:9832702-SNV	CG_Chr02	9832702	2.70416e-05	4.56797	152.81	35.3197	0.000103972	0.107751	Chr CG_Chr02	142	0.898734	C→T	0.183099	0.816901	ClCG02G007990	exon	ABC transporter B family member 19
	S8_18898330	CG_CHR08:18898330-SNV	CG_Chr08	18898330	0.000398906	3.39913	-321.017	88.687	0.000311915	0.0779404	Chr CG_Chr08	158	1	A→G	0.462025	0.537975	ClCG08G006440	exon	Acyl-[acyl-carrier-protein] desaturase
	S5_6406601	CG_CHR05:6406601-SNV-2	CG_Chr05	6406601	0.000937451	3.02805	236.027	69.9643	0.000935745	0.0684021	Chr CG_Chr05	155	0.981013	G→T	0.0580645	0.941935	ClCG05G006410	intron	Pentatricopeptide repeat-containing protein, putative
Tyrosine	S11_5403367	CG_CHR11:5403367-SNV	CG_Chr11	5403367	5.1e-06	5.29224	114.187	29.4571	0.000103972	0.0883766	Chr CG_Chr11	123	0.778481	C→A	0.219512	0.780488	ClCG11G005030	UTR3	DNA-directed RNA polymerase
	S10_37000383	CG_CHR10:37000383-SNV	CG_Chr10	37000383	0.000513586	3.28939	-95.6408	33.2037	0.00488667	0.0508085	Chr CG_Chr10	148	0.936709	C→T	0.118243	0.881757	ClCG10G022580	intron	TOM1-like protein 2
	S11_3584374	CG_CHR11:3584374-SNV	CG_Chr11	3584374	0.000559225	3.25241	105.787	30.0201	0.000311915	0.0741714	Chr CG_Chr11	143	0.905063	C→A	0.143357	0.856643	ClCG11G003430	exon	Arogenate dehydrogenase
	S11_26827363	CG_CHR11:26827363-SNV	CG_Chr11	26827363	0.000654333	3.1842	150.122	43.5148	0.000519859	0.0737976	Chr CG_Chr11	137	0.867089	G→T	0.0547445	0.945255	ClCG11G013620	intron	Aspartate/tyrosine/aromatic aminotransferase
	S5_5365174	CG_CHR05:5365174-SNV	CG_Chr05	5365174	0.000766095	3.11572	83.178	24.23	0.000727802	0.0706569	Chr CG_Chr05	157	0.993671	A→G	0.130573	0.869427	ClCG05G005480	intron	Endo-1,3-1,4-beta-d-glucanase, putative
Methionine	S2_25069764	CG_CHR02:25069764-SNV	CG_Chr02	25069764	1.93e-08	7.71394	51.3837	14.2771	0.000103972	0.0771225	Chr CG_Chr02	152	0.962025	G→T	0.0625	0.9375	ClCG02G011880	exon	E3 ubiquitin-protein ligase UPL3
	S5_24913777	CG_CHR05:24913777-SNV	CG_Chr05	24913777	2.58e-06	5.58921	-51.4874	16.0612	0.00135163	0.0621777	Chr CG_Chr05	156	0.987342	T→A	0.458333	0.541667	ClCG05G014600	exon	Unknown protein
	S5_13391124	CG_CHR05:13391124-SNV	CG_Chr05	13391124	1.18e-05	4.92947	-28.9138	12.3145	0.0144521	0.0343452	Chr CG_Chr05	149	0.943038	T→C	0.0872483	0.912752	ClCG05G011340	exon	U-box domain-containing family protein
	S6_30733021	CG_CHR06:30733021-SNV	CG_Chr06	30733021	2.12e-05	4.67379	-19.1976	9.6997	0.0379497	0.0246493	Chr CG_Chr06	111	0.702532	C→T	0.207207	0.792793	ClCG06G017630	exon	Oxygen independent coproporphyrinogen III oxidase
	S3_30778607	CG_CHR03:30778607-SNV	CG_Chr03	30778607	0.000194016	3.71216	18.5254	9.03476	0.0327511	0.0264086	Chr CG_Chr03	148	0.936709	T→G	0.344595	0.655405	ClCG03G015820	UTR3	Xaa-pro dipeptidase, putative
	S9_4986546	CG_CHR09:4986546-SNV	CG_Chr09	4986546	0.000439643	3.3569	37.4984	10.4386	0.000311915	0.076856	Chr CG_Chr09	139	0.879747	G→T	0.0935252	0.906475	ClCG09G005750	exon	Cement protein 3B variant 1
	S5_9261382	CG_CHR05:9261382-SNV	CG_Chr05	9261382	0.000732599	3.13513	-15.5715	7.07534	0.0223539	0.0303021	Chr CG_Chr05	147	0.93038	A→G	0.329932	0.670068	ClCG05G008580	exon	Acidic endochitinase
	S11_5403367	CG_CHR11:5403367-SNV	CG_Chr11	5403367	0.000778717	3.10862	34.9694	10.2009	0.000519859	0.0704744	Chr CG_Chr11	123	0.778481	C→A	0.219512	0.780488	ClCG11G005030	UTR3	DNA-directed RNA polymerase
Valine	S2_9832702	CG_CHR02:9832702-SNV	CG_Chr02	9832702	6.79e-06	5.16837	159.413	35.7574	0.000103972	0.113654	Chr CG_Chr02	142	0.898734	C→T	0.183099	0.816901	ClCG02G007990	exon	ABC transporter B family member 19
	S10_37000383	CG_CHR10:37000383-SNV	CG_Chr10	37000383	3.23e-05	4.49053	-171.98	52.8903	0.000727802	0.107769	Chr CG_Chr10	148	0.936709	C→T	0.118243	0.881757	ClCG10G022580	intron	TOM1-like protein 2
	S1_35597947	CG_CHR01:35597947-SNV	CG_Chr01	35597947	0.0001635	3.78648	-89.3163	31.4823	0.00426284	0.0493641	Chr CG_Chr01	155	0.981013	G→A	0.419355	0.580645	ClCG01G021920	intron	Prephenate dehydratase, putative
	S4_26850326	CG_CHR04:26850326-SNV	CG_Chr04	26850326	0.000261035	3.5833	115.25	41.1156	0.00509461	0.0842315	Chr CG_Chr04	113	0.71519	A→G	0.163717	0.836283	ClCG04G011860	exon	Transmembrane protein adipocyte-associated 1 homolog
	S2_32538933	CG_CHR02:32538933-SNV	CG_Chr02	32538933	0.000350858	3.45487	78.1727	46.1024	0.0689333	0.0808776	Chr CG_Chr02	114	0.721519	G→T	0.162281	0.837719	ClCG02G017970	exon	Late embryogenesis abundant protein-like
	S8_28434785	CG_CHR08:28434785-SNV	CG_Chr08	28434785	0.00071189	3.14759	-172.045	53.1005	0.000935745	0.072839	Chr CG_Chr08	157	0.993671	G→T	0.414013	0.585987	ClCG08G016000	exon	abscisic acid responsive elements-binding factor 2 LENGTH=427
	S2_25069764	CG_CHR02:25069764-SNV	CG_Chr02	25069764	0.000938943	3.02736	226.352	67.1056	0.000519859	0.0683843	Chr CG_Chr02	152	0.962025	G→T	0.0625	0.9375	ClCG02G011880	exon	E3 ubiquitin-protein ligase UPL3
Isoleucine	S2_9832702	CG_CHR02:9832702-SNV	CG_Chr02	9832702	6.43e-09	8.19172	78.64	15.7782	0.000103972	?	Cofactor	142	0.898734	C→T	0.183099	0.816901	ClCG02G007990	exon	ABC transporter B family member 19
	S2_25069764	CG_CHR02:25069764-SNV	CG_Chr02	25069764	3.29e-07	6.48322	101.645	27.8846	0.000935745	0.07943	Chr CG_Chr02	152	0.962025	G→T	0.0625	0.9375	ClCG02G011880	exon	E3 ubiquitin-protein ligase UPL3
	S6_28218401	CG_CHR06:28218401-SNV	CG_Chr06	28218401	5.84e-05	4.2333	78.3164	24.4216	0.00239135	0.0625983	Chr CG_Chr06	123	0.778481	G→C	0.0772358	0.922764	ClCG06G014770	intron	Synaptotagmin, putative
	S9_20025441	CG_CHR09:20025441-SNV	CG_Chr09	20025441	0.000113886	3.94353	37.2559	17.119	0.0233936	0.0298371	Chr CG_Chr09	152	0.962025	C→T	0.328947	0.671053	ClCG09G013490	exon	Transcription cofactor, putative
	S3_29342958	CG_CHR03:29342958-SNV	CG_Chr03	29342958	0.000127911	3.89309	-33.9305	13.5664	0.0107091	0.0390338	Chr CG_Chr03	124	0.78481	C→T	0.294355	0.705645	ClCG03G014460	intron	Peptidyl-tRNA hydrolase, putative
	S11_30111239	CG_CHR11:30111239-SNV	CG_Chr11	30111239	0.00040378	3.39386	-20.6424	14.9498	0.132564	0.0122288	Chr CG_Chr11	149	0.943038	T→C	0.365772	0.634228	ClCG11G016800	UTR5	Aminotransferase
	S11_28343400	CG_CHR11:28343400-SNV	CG_Chr11	28343400	0.000612918	3.2126	-56.0512	16.0238	0.00114369	0.0736065	Chr CG_Chr11	155	0.981013	C→T	0.348387	0.651613	ClCG11G015000	intron	Tetratricopeptide repeat domain-containing protein
	S10_32548513	CG_CHR10:32548513-SNV	CG_Chr10	32548513	0.000745095	3.12779	-42.5212	28.6433	0.104284	0.0746941	Chr CG_Chr10	157	0.993671	C→T	0.210191	0.789809	ClCG10G017670	exon	Kinase family protein
	S9_5180068	CG_CHR09:5180068-SNV	CG_Chr09	5180068	0.000809306	3.09189	58.5828	17.1433	0.00135163	0.0704839	Chr CG_Chr09	157	0.993671	C→A	0.156051	0.843949	ClCG09G006040	UTR5	Dol-P-Man:Man(5)GlcNAc(2)-PP-Dol alpha-1,3-mannosyltransferase
	S1_35597947	CG_CHR01:35597947-SNV	CG_Chr01	35597947	0.000896266	3.04756	-44.023	12.9967	0.00155958	0.0693369	Chr CG_Chr01	155	0.981013	G→A	0.419355	0.580645	ClCG01G021920	intron	Prephenate dehydratase, putative
	S6_1130446	CG_CHR06:1130446-SNV	CG_Chr06	1130446	0.000938992	3.02734	41.2669	20.001	0.0298399	0.0719801	Chr CG_Chr06	127	0.803797	A→C	0.165354	0.834646	ClCG06G001130	exon	F-box family protein
Leucine	S2_9832702	CG_CHR02:9832702-SNV	CG_Chr02	9832702	3.24e-06	5.48978	94.3413	20.5022	0.000103972	0.120188	Chr CG_Chr02	142	0.898734	C→T	0.183099	0.816901	ClCG02G007990	exon	ABC transporter B family member 19
	S6_28218401	CG_CHR06:28218401-SNV	CG_Chr06	28218401	4.73e-05	4.325	129.693	33.2482	0.000311915	0.102222	Chr CG_Chr06	123	0.778481	G→C	0.0772358	0.922764	ClCG06G014770	intron	Synaptotagmin, putative
	S1_35597947	CG_CHR01:35597947-SNV	CG_Chr01	35597947	0.000241102	3.6178	-57.405	17.9903	0.00176752	0.0840706	Chr CG_Chr01	155	0.981013	G→A	0.419355	0.580645	ClCG01G021920	intron	Prephenate dehydratase, putative
	S2_38357162	CG_CHR02:38357162-SNV	CG_Chr02	38357162	0.000603748	3.21914	71.0779	22.8634	0.00322312	0.0742411	Chr CG_Chr02	155	0.981013	T→C	0.325806	0.674194	ClCG02G024030	exon	Glucan endo-1,3-beta-glucosidase
	S1_13388733	CG_CHR01:13388733-SNV	CG_Chr01	13388733	0.000701062	3.15424	75.5349	22.0315	0.000935745	0.0720972	Chr CG_Chr01	156	0.987342	C→T	0.192308	0.807692	ClCG01G009550	exon	60 kDa chaperonin
Phenylalanine	S4_24184737	CG_CHR04:24184737-SNV	CG_Chr04	24184737	0.00012204	3.9135	174.376	44.2363	0.000103972	0.0911151	Chr CG_Chr04	156	0.987342	G→T	0.128205	0.871795	ClCG04G009380	UTR3	5'-AMP-activated protein kinase-like protein
	S4_26143541	CG_CHR04:26143541-SNV	CG_Chr04	26143541	0.000217055	3.66343	240.419	63.4732	0.000519859	0.0847189	Chr CG_Chr04	153	0.968354	A→C	0.45098	0.54902	ClCG04G011160	UTR3	Unknown protein
	S4_23040435	CG_CHR04:23040435-SNV	CG_Chr04	23040435	0.000256387	3.5911	272.175	72.7297	0.000935745	0.0828656	Chr CG_Chr04	156	0.987342	A→C	0.0576923	0.942308	ClCG04G008130	UTR5	Exoribonuclease II
	S6_559408	CG_CHR06:559408-SNV	CG_Chr06	559408	0.000369444	3.43245	134.736	37.0036	0.00114369	0.0787959	Chr CG_Chr06	153	0.968354	T→A	0.176471	0.823529	ClCG06G000610	exon	SWIb domain-containing protein
Ethanolamine	S2_25069764	CG_CHR02:25069764-SNV	CG_Chr02	25069764	8.17e-05	4.0879	317.282	78.4011	0.000103972	0.095564	Chr CG_Chr02	152	0.962025	G→T	0.0625	0.9375	ClCG02G011880	exon	E3 ubiquitin-protein ligase UPL3
	S10_33112775	CG_CHR10:33112775-SNV	CG_Chr10	33112775	0.000161962	3.79059	-244.465	75.7809	0.00155958	0.0890744	Chr CG_Chr10	150	0.949367	C→A	0.07	0.93	ClCG10G018160	exon	F26K24.5 protein
	S2_9832702	CG_CHR02:9832702-SNV	CG_Chr02	9832702	0.000215405	3.66674	163.291	43.0871	0.000311915	0.0848038	Chr CG_Chr02	142	0.898734	C→T	0.183099	0.816901	ClCG02G007990	exon	ABC transporter B family member 19
	S7_32825838	CG_CHR07:32825838-SNV	CG_Chr07	32825838	0.000258203	3.58804	293.799	78.5487	0.000519859	0.082787	Chr CG_Chr07	155	0.981013	T→G	0.0741935	0.925806	ClCG07G016400	exon	Lipid transfer protein
	S6_6090856	CG_CHR06:6090856-SNV	CG_Chr06	6090856	0.000640487	3.19349	-138.303	61.9977	0.0236016	0.0735736	Chr CG_Chr06	141	0.892405	A→G	0.0992908	0.900709	ClCG06G005380	intron	Lipase
	S5_31734877	CG_CHR05:31734877-SNV	CG_Chr05	31734877	0.000902261	3.04467	-232.966	85.8144	0.00634227	0.0696999	Chr CG_Chr05	155	0.981013	A→C	0.0548387	0.945161	ClCG05G019480	exon	Pyridoxal phosphate (PLP)-dependent transferases superfamily protein
Hydroxylysine	S1_27083208	CG_CHR01:27083208-SNV	CG_Chr01	27083208	0.000453483	3.34344	10.142	2.83018	0.00135163	0.0765102	Chr CG_Chr01	149	0.943038	C→A	0.057047	0.942953	ClCG01G013660	intron	Class III homeobox-leucine zipper protein
	S2_7238440	CG_CHR02:7238440-SNV	CG_Chr02	7238440	0.000174176	3.75901	-5.40313	1.46256	0.00114369	0.087708	Chr CG_Chr02	138	0.873418	C→A	0.318841	0.681159	ClCG02G006360	exon	UDP-Glycosyltransferase superfamily protein LENGTH=490
	S2_32545560	CG_CHR02:32545560-SNV	CG_Chr02	32545560	7.54e-06	5.12276	-12.6398	2.72727	0.000103972	0.121711	Chr CG_Chr02	157	0.993671	G→A	0.11465	0.88535	ClCG02G017980	intron	Bromodomain-containing protein, putative
	S5_34280790	CG_CHR05:34280790-SNV	CG_Chr05	34280790	0.000492478	3.30761	-5.47604	1.53816	0.00155958	0.0755899	Chr CG_Chr05	145	0.917722	A→C	0.203448	0.796552	ClCG05G022330	exon	At1g22970/F19G10_8
	S6_7221669	CG_CHR06:7221669-SNV	CG_Chr06	7221669	0.000343909	3.46356	8.42805	3.4173	0.0211063	0.0800914	Chr CG_Chr06	139	0.879747	G→T	0.107914	0.892086	ClCG06G006290	UTR3	Folate/biopterin transporter family protein, expressed
	S6_26879100	CG_CHR06:26879100-SNV	CG_Chr06	26879100	0.000341936	3.46605	-6.271	2.31921	0.0119567	0.045045	Chr CG_Chr06	142	0.898734	A→C	0.119718	0.880282	ClCG06G013500	exon	Villin 4
	S7_21477218	CG_CHR07:21477218-SNV	CG_Chr07	21477218	0.000226258	3.6454	-4.07353	1.59653	0.0169474	0.0403075	Chr CG_Chr07	158	1	T→A	0.243671	0.756329	ClCG07G008060	exon	Haloacid dehalogenase-like hydrolase (HAD) superfamily protein LENGTH=373
	S9_32801746	CG_CHR09:32801746-SNV	CG_Chr09	32801746	0.000248954	3.60388	9.21225	2.45638	0.000935745	0.0831931	Chr CG_Chr09	156	0.987342	T→A	0.0865385	0.913462	ClCG09G016770	intron	Integrator complex subunit 11
	S10_26178869	CG_CHR10:26178869-SNV	CG_Chr10	26178869	0.000423208	3.37345	1.66472	1.35832	0.225307	0.00959752	Chr CG_Chr10	156	0.987342	G→A	0.410256	0.589744	ClCG10G012220	UTR3	WD-40 repeat family protein / notchless protein, putative LENGTH=473
	S10_29699532	CG_CHR10:29699532-SNV	CG_Chr10	29699532	0.000398479	3.39959	1.07102	2.22995	0.618528	0.00148603	Chr CG_Chr10	150	0.949367	A→G	0.11	0.89	ClCG10G015190	exon	Glycogen synthase family protein
	S11_134841	CG_CHR11:134841-SNV	CG_Chr11	134841	1.45e-06	5.83975	9.16572	2.72176	0.00218341	0.0772124	Chr CG_Chr11	146	0.924051	C→A	0.0684932	0.931507	ClCG11G000100	exon	Zinc finger-homeodomain protein 1
Alpha Aminoadipic Acid	S2_9832702	CG_CHR02:9832702-SNV	CG_Chr02	9832702	4.65e-08	7.33227	111.529	25.6192	0.000311915	0.108948	Chr CG_Chr02	142	0.898734	C→T	0.183099	0.816901	ClCG02G007990	exon	ABC transporter B family member 19
	S11_7365299	CG_CHR11:7365299-SNV	CG_Chr11	7365299	6.89e-08	7.16202	186.791	41.8052	0.000103972	0.114104	Chr CG_Chr11	150	0.949367	C→T	0.0733333	0.926667	ClCG11G006720	exon	AT hook motif DNA-binding family protein LENGTH=354
	S6_1791816	CG_CHR06:1791816-SNV	CG_Chr06	1791816	4.61e-07	6.33604	143.389	45.7798	0.00280724	0.059525	Chr CG_Chr06	155	0.981013	G→A	0.0677419	0.932258	ClCG06G001740	exon	Homeodomain-like superfamily protein LENGTH=314
	S8_17658671	CG_CHR08:17658671-SNV	CG_Chr08	17658671	2.13e-05	4.67168	140.04	40.5788	0.00155958	0.0713549	Chr CG_Chr08	157	0.993671	G→A	0.0700637	0.929936	ClCG08G005610	intron	LysM-domain GPI-anchored protein 1
	S11_30966285	CG_CHR11:30966285-SNV-2	CG_Chr11	30966285	3.54e-05	4.45082	60.7238	37.2998	0.0658141	0.0168117	Chr CG_Chr11	153	0.968354	G→T	0.127451	0.872549	ClCG11G017780	intron	Tyrosine aminotransferase, putative
	S9_5180068	CG_CHR09:5180068-SNV	CG_Chr09	5180068	5.49e-05	4.26007	85.8871	29.6182	0.00467873	0.0161388	Chr CG_Chr09	157	0.993671	C→A	0.156051	0.843949	ClCG09G006040	UTR5	Dol-P-Man:Man(5)GlcNAc(2)-PP-Dol alpha-1,3-mannosyltransferase
	S8_21705555	CG_CHR08:21705555-SNV	CG_Chr08	21705555	9.43e-05	4.02534	213.591	53.2716	0.000519859	0.0939695	Chr CG_Chr08	157	0.993671	G→A	0.0541401	0.94586	ClCG08G009120	UTR3	Protein FAM135B
	S5_6406601	CG_CHR05:6406601-SNV-2	CG_Chr05	6406601	9.52e-05	4.02114	200.732	50.0959	0.000727802	0.0938623	Chr CG_Chr05	155	0.981013	G→T	0.0580645	0.941935	ClCG05G006410	intron	Pentatricopeptide repeat-containing protein, putative
	S2_36169723	CG_CHR02:36169723-SNV	CG_Chr02	36169723	0.000113258	3.94593	89.9443	33.8824	0.00842171	0.0434869	Chr CG_Chr02	157	0.993671	C→A	0.136943	0.863057	ClCG02G021730	exon	Lysosomal Pro-X carboxypeptidase, putative
	S2_25069764	CG_CHR02:25069764-SNV	CG_Chr02	25069764	0.000356974	3.44736	174.044	47.6736	0.00114369	0.0791786	Chr CG_Chr02	152	0.962025	G→T	0.0625	0.9375	ClCG02G011880	exon	E3 ubiquitin-protein ligase UPL3
	S5_12794126	CG_CHR05:12794126-SNV	CG_Chr05	12794126	0.00045657	3.34049	74.8414	34.4929	0.0217301	0.029478	Chr CG_Chr05	155	0.981013	C→T	0.109677	0.890323	ClCG05G011020	UTR3	Fructokinase
	S8_19901487	CG_CHR08:19901487-SNV	CG_Chr08	19901487	0.000466975	3.33071	36.844	30.0575	0.150031	0.00960078	Chr CG_Chr08	154	0.974684	C→T	0.253247	0.746753	ClCG08G007440	exon	Pyruvate dehydrogenase E1 component alpha subunit
	S7_32825838	CG_CHR07:32825838-SNV	CG_Chr07	32825838	0.000553969	3.25651	167.815	47.5859	0.00135163	0.0742768	Chr CG_Chr07	155	0.981013	T→G	0.0741935	0.925806	ClCG07G016400	exon	Lipid transfer protein
	S5_5630362	CG_CHR05:5630362-SNV	CG_Chr05	5630362	0.000937127	3.0282	-146.907	43.5456	0.00176752	0.0684059	Chr CG_Chr05	155	0.981013	C→A	0.454839	0.545161	ClCG05G005740	exon	DNA helicase, putative
Kynurenine	S2_30824482	CG_CHR02:30824482-SNV	CG_Chr02	30824482	8.3e-05	4.08084	2.97162	1.41643	0.0271366	0.0276122	Chr CG_Chr02	157	0.993671	C→A	0.165605	0.834395	ClCG02G016350	UTR5	Cysteine synthase
	S2_33568431	CG_CHR02:33568431-SNV	CG_Chr02	33568431	3.86e-07	6.41324	-4.0044	1.12894	0.000727802	0.0750766	Chr CG_Chr02	150	0.949367	T→C	0.14	0.86	ClCG02G018810	intron	Protein strawberry notch
	S3_1518758	CG_CHR03:1518758-SNV	CG_Chr03	1518758	6.64e-06	5.17755	-4.1327	1.33439	0.00176752	0.0582763	Chr CG_Chr03	135	0.85443	A→T	0.140741	0.859259	ClCG03G001550	UTR3	Unknown protein
	S7_21477218	CG_CHR07:21477218-SNV	CG_Chr07	21477218	8.11e-05	4.09108	-3.00748	1.09165	0.00447078	0.0466811	Chr CG_Chr07	158	1	T→A	0.243671	0.756329	ClCG07G008060	exon	Haloacid dehalogenase-like hydrolase (HAD) superfamily protein LENGTH=373
	S9_38160785	CG_CHR09:38160785-SNV	CG_Chr09	38160785	0.000345228	3.46189	-5.54435	1.51482	0.000519859	0.0795516	Chr CG_Chr09	125	0.791139	G→T	0.14	0.86	ClCG09G021140	exon	receptor-like kinase 1 LENGTH=655
Tryptophan	S5_32798571	CG_CHR05:32798571-SNV	CG_Chr05	32798571	5.31272e-05	4.27468	165.154	39.7267	0.000103972	0.100317	Chr CG_Chr05	123	0.778481	G→T	0.0934959	0.906504	ClCG05G020760/ClCG05G020770	exon	HIT zinc finger family protein, expressed/Unknown protein
	S9_4790230	CG_CHR09:4790230-SNV	CG_Chr09	4790230	0.00020621	3.68569	-94.1364	24.7621	0.000519859	0.085289	Chr CG_Chr09	129	0.816456	C→T	0.422481	0.577519	ClCG09G005470	intron	Mitochondrial carrier protein, putative
	S9_4790231	CG_CHR09:4790231-SNV	CG_Chr09	4790231	0.00020621	3.68569	-94.1364	24.7621	0.000727802	0.085289	Chr CG_Chr09	129	0.816456	C→T	0.422481	0.577519	ClCG09G005470	intron	Mitochondrial carrier protein, putative
	S5_576767	CG_CHR05:576767-SNV	CG_Chr05	576767	0.000280718	3.55173	-232.387	62.5138	0.000935745	0.0818562	Chr CG_Chr05	157	0.993671	G→C	0.0605096	0.93949	ClCG05G000430	intron	Unknown protein
	S5_37772412	CG_CHR05:37772412-SNV	CG_Chr05	37772412	0.000283969	3.54673	180.759	48.667	0.00114369	0.0817279	Chr CG_Chr05	156	0.987342	T→A	0.0512821	0.948718	ClCG05G026520	intron	AP2-like ethylene-responsive transcription factor
	S10_29132086	CG_CHR10:29132086-SNV	CG_Chr10	29132086	0.000494774	3.30559	174.385	49.0011	0.00135163	0.075538	Chr CG_Chr10	155	0.981013	G→C	0.0709677	0.929032	ClCG10G014720	exon	Thaumatin-like protein
	S7_1747782	CG_CHR07:1747782-SNV	CG_Chr07	1747782	0.000579152	3.23721	-80.1113	22.7989	0.00155958	0.0737806	Chr CG_Chr07	128	0.810127	C→T	0.339844	0.660156	ClCG07G001620	UTR3	Zinc finger HIT domain-containing protein 3
	S10_33571327	CG_CHR10:33571327-SNV	CG_Chr10	33571327	0.000815113	3.08878	120.936	35.4163	0.00197546	0.0699642	Chr CG_Chr10	146	0.924051	A→G	0.143836	0.856164	ClCG10G018540	exon	ovate family protein 15 LENGTH=261
Argininosuccinic Acid	S5_27694597	CG_CHR05:27694597-SNV	CG_Chr05	27694597	3.96e-06	5.4018	41.0947	11.3184	0.000103972	0.0783826	Chr CG_Chr05	144	0.911392	A→G	0.0902778	0.909722	ClCG05G015780	intron	Leucine-rich receptor-like protein kinase family protein LENGTH=976
	S1_9156044	CG_CHR01:9156044-SNV	CG_Chr01	9156044	0.000263773	3.57877	-20.756	6.80775	0.00280724	0.0565787	Chr CG_Chr01	114	0.721519	G→T	0.359649	0.640351	ClCG01G008000	exon	Chromodomain-helicase-DNA-binding protein 1-like
	S11_3584374	CG_CHR11:3584374-SNV	CG_Chr11	3584374	0.000340462	3.46793	27.2646	9.35745	0.00384695	0.0519271	Chr CG_Chr11	143	0.905063	C→A	0.143357	0.856643	ClCG11G003430	exon	Arogenate dehydrogenase
	S7_1198640	CG_CHR07:1198640-SNV	CG_Chr07	1198640	0.000523844	3.2808	37.9075	10.7006	0.000311915	0.0749009	Chr CG_Chr07	138	0.873418	C→A	0.076087	0.923913	ClCG07G001110	exon	Protein of unknown function (DUF640) LENGTH=219
	S2_38357162	CG_CHR02:38357162-SNV	CG_Chr02	38357162	0.000566528	3.24678	26.6462	7.56964	0.000727802	0.0740266	Chr CG_Chr02	155	0.981013	T→C	0.325806	0.674194	ClCG02G024030	exon	Glucan endo-1,3-beta-glucosidase
	S5_27691992	CG_CHR05:27691992-SNV	CG_Chr05	27691992	0.000678191	3.16865	36.5874	10.5491	0.000935745	0.072018	Chr CG_Chr05	143	0.905063	C→G	0.101399	0.898601	ClCG05G015780	intron	Leucine-rich receptor-like protein kinase family protein LENGTH=976
	S3_32226027	CG_CHR03:32226027-SNV	CG_Chr03	32226027	0.000949832	3.02235	9.52946	7.11554	0.17041	0.070913	Chr CG_Chr03	157	0.993671	T→C	0.264331	0.735669	ClCG03G017030	exon	Zinc finger protein-like protein
