# Supplementary material for: Genome-wide association study and population structure analysis of seed-bound amino acids and total protein in watermelon
Source: PeerJ. 2021 Oct 19;9:e12343. doi: 10.7717/peerj.12343 (PMC8533027; doi:10.7717/peerj.12343)
Supplement: Supplemental Information 15 [file peerj-09-12343-s015.xlsx]

## Sheet: Sheet1
Table S5 SNP chromosomal positions and candidate genes significantly associated with total protein identified by GWAS.
	SNP ID	Marker	Chromosome	Position	P-Value (Initial Model)	-LOG10(P-Value)	Regression Beta	Beta Standard Error	FDR	Prop. Var. Explained	Manhattan Category	Actual Sample Size	Call Rate		Minor Allele D Frequency	Major Allele d Frequency	Gene Names	Gene Region (Combined)	Annotation
Total Protein	S3_4804455	CG_CHR03:4804455-SNV	CG_Chr03	4804455	5.23e-08	7.28186	16.7398	4.59307	0.876491	0.0798818	Chr CG_Chr03	153	0.980769	A→G	0.0555556	0.944444	ClCG03G004430	exon	Ankyrin repeat family protein
	S3_21924011	CG_CHR03:21924011-SNV	CG_Chr03	21924011	0.000527612	3.27769	-12.4783	3.52346	0.841541	0.0757639	Chr CG_Chr03	127	0.814103	C→T	0.200787	0.799213	ClCG03G011380	intron	Pentatricopeptide repeat-containing protein, putative
	S3_31339577	CG_CHR03:31339577-SNV	CG_Chr03	31339577	7.52116e-06	5.12372	8.16472	5.2546	0.968826	0.082204	Chr CG_Chr03	150	0.961538	C→G	0.0533333	0.946667	ClCG03G016270	exon	Late embryogenesis abundant protein D-34, putative
	S3_32939087	CG_CHR03:32939087-SNV	CG_Chr03	32939087	0.000610683	3.21418	9.05376	4.09728	0.96413	0.0770273	Chr CG_Chr03	155	0.99359	C→T	0.112903	0.887097	ClCG03G017780	exon	Pentatricopeptide repeat-containing family protein
	S6_122527	CG_CHR06:122527-SNV	CG_Chr06	122527	0.000522357	3.28203	-7.77679	2.19082	0.20829	0.0809799	Chr CG_Chr06	141	0.903846	A→C	0.258865	0.741135	ClCG06G000080	exon	Armadillo/beta-catenin repeat family protein
	S9_4985988	CG_CHR09:4985988-SNV-3	CG_Chr09	4985988	3.96437e-08	7.40183	-11.1922	3.56552	1	0.0715974	Chr CG_Chr09	123	0.788462	G→T	0.0650407	0.934959	ClCG09G005750	exon	Cement protein 3B variant 1
	S9_12726871	CG_CHR09:12726871-SNV	CG_Chr09	12726871	0.000121978	3.91372	6.16592	1.56074	0.0583662	0.0984036	Chr CG_Chr09	146	0.935897	A→G	0.359589	0.640411	ClCG09G011960	intron	Mitochondrial carrier protein
	S10_8919441	CG_CHR10:8919441-SNV	CG_Chr10	8919441	0.000193097	3.71422	8.64295	2.25867	0.0839972	0.00560898	Chr CG_Chr10	142	0.910256	G→A	0.214789	0.785211	ClCG10G006390	exon	Calcium-binding EF-hand family protein LENGTH=130
	S10_32631623	CG_CHR10:32631623-SNV	CG_Chr10	32631623	0.000432634	3.36388	16.632	5.9603	0.9464	0.0810665	Chr CG_Chr10	142	0.910256	T→C	0.18662	0.81338	ClCG10G017710	exon	zinc finger protein 8 LENGTH=257
	S11_3563224	CG_CHR11:3563224-SNV	CG_Chr11	3563224	7.04412e-05	4.15217	7.10608	2.76248	0.881439	0.0808067	Chr CG_Chr11	131	0.839744	T→A	0.194656	0.805344	ClCG11G003390	exon	EamA-like transporter family LENGTH=394
	S11_4361810	CG_CHR11:4361810-SNV	CG_Chr11	4361810	4.78615e-06	5.32001	-6.83495	3.13735	0.985517	0.0718512	Chr CG_Chr11	153	0.980769	A→G	0.130719	0.869281	ClCG11G004120	exon	SUMO-activating enzyme subunit 2
