# Supplementary material for: Genome-wide association study and population structure analysis of seed-bound amino acids and total protein in watermelon
Source: PeerJ. 2021 Oct 19;9:e12343. doi: 10.7717/peerj.12343 (PMC8533027; doi:10.7717/peerj.12343)
Supplement: Supplemental Information 16 [file peerj-09-12343-s016.xlsx]

## Sheet: Percent protein Raw Data
Accession	Rep 1	Rep 2	Rep3
W-126	9.74696	9.74696	10.4129
W-127	10.1631	10.3296	10.6626
W-129	12.8267	11.6614	13.5758
W-137	9.41402	8.99784	8.58165
W-138	9.66373	9.33078	10.3296
W-139	8.08224	7.83253	8.99784
W-140	9.24754	9.8302	10.2464
W-141	11.2452	11.162	10.7458
W-142	9.58049	9.91343	9.74696
W-143	8.83136	9.41402	9.16431
W-144	10.2464	10.4961	10.9123
W-145	7.41635	7.999	8.16547
W-146	9.74696	9.74696	9.49725
W-147	13.5758	12.8267	13.9088
W-149	10.6626	12.3273	11.8279
W-150	12.1608	13.2429	12.9932
W-151	12.0776	11.4949	11.4117
W-157	12.9099	12.7435	12.9099
W-158	13.3261	13.4926	15.407
W-159	11.5782	11.4949	11.4117
W-160	12.9099	12.0776	13.0764
W-164	9.8302	9.58049	10.6626
W-176	12.4938	12.3273	12.4938
W-177	9.66373	9.66373	9.8302
W-178	11.5782	12.244	12.244
W-179	9.58049	9.33078	9.99667
W-180	10.5793	11.6614	11.5782
W-181	11.162	10.829	11.0787
W-182	9.33078	10.2464	11.0787
W-183	10.9955	11.6614	12.244
W-184	9.91343	10.3296	10.9955
W-185	9.33078	9.91343	10.5793
W-186	10.5793	11.3285	11.6614
W-187	14.325	15.0741	14.6579
W-188	14.0752	14.7411	14.8244
W-189	12.244	11.9111	12.7435
W-190	17.4047	16.5723	17.3215
W-192	11.6614	12.1608	12.9099
W-193	13.992	13.6591	14.5747
W-194	14.5747	14.325	14.7411
W-195	11.162	11.4117	11.5782
W-196	10.9955	10.9123	10.7458
W-197	13.8255	13.9088	14.7411
W-198	11.0787	10.9123	11.9943
W-199	11.4949	11.7446	13.4926
W-200	8.41518	8.58165	9.08107
W-201	12.0776	12.4105	12.6602
W-202	7.24988	7.00017	7.33311
W-203	10.829	10.9123	10.7458
W-204	13.9088	13.4094	14.4914
W-237	11.5782	11.3285	11.4117
W-238	12.4938	13.4094	11.9943
W-239	8.41518	9.08107	9.16431
W-240	7.0834	10.1631	9.8302
W-241	9.49725	9.66373	9.49725
W-242	12.3273	11.6614	12.9099
W-243	13.4094	12.4105	12.9932
W-244	8.99784	9.24754	9.58049
W-245	10.829	11.3285	11.0787
W-246	9.33078	9.41402	9.41402
W-247	9.74696	9.24754	9.74696
W-248	9.49725	9.49725	9.58049
W-249	9.49725	9.8302	10.5793
W-250	11.9111	11.6614	10.9955
W-251	11.3285	11.6614	12.0776
W-252	11.6614	12.1608	12.4938
W-253	9.91343	9.33078	10.3296
W-254	14.5747	14.0752	14.4082
W-255	10.9955	10.9123	10.4129
W-256	11.0787	11.2452	11.4949
W-257	10.4129	9.58049	10.2464
W-258	15.4903	15.6567	15.4903
W-259	10.2464	10.5793	12.4105
W-260	9.08107	8.99784	8.08224
W-261	12.577	12.577	13.2429
W-262	12.4938	13.2429	12.8267
W-263	11.4949	11.9943	11.5782
W-264	9.66373	10.1631	9.33078
W-265	9.49725	9.33078	10.5793
W-266	11.5782	11.4117	11.4117
W-267	11.5782	11.4117	11.162
W-268	10.5793	10.7458	10.1631
W-269	10.9123	10.6626	10.7458
W-270	0.507741	1.17363	1.42334
W-271	10.4129	10.0799	10.7458
W-272	18.3203	18.4868	17.6544
W-273	14.7411	13.9088	15.4903
W-274	10.4961	11.0787	11.2452
W-275	16.4059	16.0729	17.0717
W-276	9.41402	9.58049	8.9146
W-277	7.00017	7.00017	7.66606
W-278	18.0706	18.9029	18.3203
W-279	12.0776	12.1608	12.0776
W-280	9.41402	9.33078	9.8302
W-281	8.33195	8.49842	8.74813
W-282	8.24871	8.99784	9.08107
W-283	10.2464	10.2464	10.0799
W-284	8.08224	8.24871	8.08224
W-285	9.74696	9.24754	10.4129
W-286	9.8302	10.5793	10.9955
W-287	10.3296	11.0787	11.4117
W-288	7.66606	7.58282	7.91576
W-289	7.58282	7.16664	8.16547
W-290	7.74929	9.08107	8.49842
W-291	10.3296	10.1631	10.4961
W-292	11.0787	10.5793	10.7458
W-293	9.41402	9.16431	9.74696
W-294	13.2429	12.6602	13.5758
W-295	9.49725	8.99784	9.16431
W-296	9.74696	9.99667	10.0799
W-297	9.24754	9.41402	9.74696
W-298	9.66373	10.4961	9.91343
W-299	13.2429	12.7435	11.9943
W-300	8.9146	9.16431	10.0799
W-301	19.4024	18.9862	20.1515
W-302	10.4961	12.577	12.4105
W-303	8.99784	9.8302	9.8302
W-304	12.8267	12.0776	12.9932
W-305	8.99784	9.24754	9.16431
W-306	9.24754	9.49725	9.74696
W-307	10.4129	10.1631	10.7458
W-308	10.4961	10.6626	10.829
W-309	8.74813	8.99784	9.49725
W-310	14.2417	13.6591	14.7411
W-311	8.83136	8.74813	9.24754
W-312	13.4094	13.6591	13.992
W-313	8.16547	9.24754	9.58049
W-314	9.49725	9.66373	9.33078
W-315	14.2417	13.4094	13.5758
W-316	10.5793	10.2464	11.4117
W-317	9.33078	9.41402	10.4961
W-318	10.0799	10.0799	10.3296
W-319	10.4961	9.58049	10.3296
W-320	15.8232	14.9908	16.2394
W-321	9.24754	8.83136	10.3296
W-322	12.9099	13.992	13.9088
W-323	7.58282	7.74929	7.91576
W-324	9.16431	9.24754	9.49725
W-325	11.8279	11.162	12.4105
W-326	10.4129	9.16431	10.7458
W-327	10.4961	10.6626	11.2452
W-328	11.6614	11.4117	11.4949
W-329	9.49725	8.58165	9.41402
W-330	11.4117	11.9111	11.7446
W-331	13.0764	13.2429	14.2417
W-332	9.41402	8.74813	10.2464
W-333	7.74929	7.999	8.66489
W-334	10.9955	11.5782	12.244
W-335	8.9146	8.24871	9.41402
W-336	10.9955	8.99784	9.24754
W-337	9.41402	9.41402	9.33078
W-338	9.91343	9.8302	11.162
W-339	9.49725	9.33078	9.08107
W-340	10.7458	10.6626	11.6614
W-341	11.0787	10.4129	11.4949
W-342	10.6626	11.4949	10.829
W-343	10.9123	11.6614	11.5782
W-344	12.6602	13.0764	13.8255
W-345	9.99667	10.2464	10.7458
W-346	10.0799	9.99667	11.2452
W-347	12.1608	12.244	12.8267
W-348	9.33078	11.6614	11.9111
W-349	8.83136	9.58049	9.08107
W-350	13.6591	13.9088	14.0752
W-351	12.8267	12.9099	13.7423
W-352	9.58049	11.0787	11.6614
W-353	13.8255	14.1585	14.5747
W-354	12.3273	13.2429	12.9099
W-355	8.99784	9.16431	9.49725
W-356	11.2452	11.5782	12.244
W-357	10.4129	11.4117	12.1608
W-358	11.7446	12.8267	13.2429
W-359	12.4938	13.6591	13.0764
W-360	11.3285	11.3285	11.4949
W-361	10.5793	10.3296	10.4961
W-362	12.4105	12.577	13.1596
W-363	10.829	11.162	11.8279
W-364	11.7446	12.4105	13.3261
W-365	10.5793	11.0787	11.8279
W-366	10.9123	10.4961	11.5782
W-367	8.9146	9.74696	9.8302
W-368	13.1596	12.7435	14.2417
W-369	13.4926	13.992	13.6591
W-370	12.6602	13.4094	13.4094
W-371	13.4926	13.3261	14.2417
W-372	12.6602	13.2429	13.4094
W-373	11.4949	11.5782	11.8279
W-374	12.1608	12.244	12.9099
W-375	10.4961	10.9123	10.7458
W-376	11.4117	12.244	13.3261
W-377	9.8302	9.99667	10.4961
W-378	9.91343	9.24754	10.3296
W-379	11.5782	13.3261	14.5747
W-380	13.3261	13.2429	13.8255
W-381	8.58165	7.58282	8.74813
W-382	8.66489	8.83136	8.33195
W-383	9.8302	9.08107	9.16431
W-384	10.3296	10.5793	10.9955
W-385	10.1631	10.4961	11.0787
W-386	10.9955	10.9955	10.9123
W-387	7.83253	7.16664	8.24871
W-388	10.9955	11.162	11.4949
W-389	10.4129	10.9123	11.4949
W-390	11.5782	10.9955	11.9943
W-391	7.16664	8.41518	8.16547
W-392	12.4105	14.0752	13.992
W-393	7.58282	7.74929	7.999
W-394	10.5793	10.7458	10.829
W-395	10.4961	10.1631	10.2464
W-396	12.0776	12.9932	13.3261
W-397	9.99667	10.3296	11.2452
